# Supplementary material
Source: publisher figshare collection journal article supplement (https://rs.figshare.com/ndownloader/files/14203337)
Supplement: Supplementary file 1 [file 14203337]

## Sheet: Supp Table 1
Characteristics of samples included in the MINERvA cohort. * = primary characteristics used to match cases and controls. ** = secondary characteristics used to match cases and controls as closely as possible.
Characteristic	Unit/Category	ASD	Controls	P-value
Sex* (%)	male	52	49.8	0.933
Birth year* (%)	1998	31.8	30.6	0.991
	1999	28.3	29
	2000	7	6.78
	2001	13.7	14.2
	2002	19.2	19.4
Gestational age** (mean (SD))	weeks	39.6 (1.82)	39.6 (1.72)	0.96
Urbanicity** (%)	1: Capital	18.1	17	0.879
	2: Suburb of the capital	14.9	13.4
	3: Municipalities having a town with more than 100,000 inhabitants	8.27	8.68
	4: Municipalities having a town with between 10,000 and 100,000 inhabitants	27.3	29.2
	5: Other municipalities in Denmark (largest town has less than 10,000 inhabitants)	31.3	31.7
Time to sampling (Mean (SD))	days	6.01 (3.15)	6.15 (3.33)	0.46
Maternal age - Mean (SD)	years	29.2 (4.94)	29.7 (4.57)	0.07
Paternal age - Mean (SD)	years	32.1 (6.04)	31.9 (5.40)	0.476
Maternal smoking during pregnancy (%)	Smoke at any time	29	21.2	0.00256
	Non-smoker	71	78.8
Maternal smoking amount during pregnancy (%)	5 or less cigarettes per day	6.46	7.25	0.00573
	6-10 cigarettes per day	11.2	7.59
	11-20 cigarettes per day	9.6	5.06
	21 or more cigarettes per day	1.05	1.18
Birth weight - Mean (SD)	grams	3512 (581)	3541 (542)	0.355

## Sheet: Supp Table 2
Eighteen birth weight associated DMPs were identified at a threshold of P < 1x10-7. Genomic locations are based on hg19.
ProbeID	EWAS of birth weight (g)		EWAS of birth weight (g) X ASD	Chr	Pos	Gene Annotation		ARIES EWAS of birth weight
	P-value	Regression coefficient	P-value			UCSC RefGene Name	UCSC RefGene Group	t-statistic	P-value
cg17850088	2.52521e-12	1.88332e-05	0.268509	chr1	150119278			NA	NA
cg20076442	1.18059e-10	-1.95944e-05	0.359079	chr8	72745197			-5.89	6.01e-09
cg19744173	1.86669e-10	-1.41166e-05	0.518825	chr2	112913178	FBLN7;FBLN7	Body;Body	NA	NA
cg12539124	2.82764e-09	-1.75227e-05	0.0446249	chr6	21948636	FLJ22536	Body	NA	NA
cg06870470	2.97438e-09	-1.67779e-05	0.99894	chr19	11315767	DOCK6	Body	-5.58	3.39e-08
cg04214459	3.557e-09	-1.44717e-05	0.503431	chr1	198637612	PTPRC;PTPRC;PTPRC;PTPRC	Body;Body;Body;Body	NA	NA
cg12868738	4.27027e-09	1.65744e-05	0.471054	chr7	148946070	ZNF212	Body	NA	NA
cg05937055	4.66461e-09	-1.20037e-05	0.205299	chr1	181128764			NA	NA
cg16165575	8.95176e-09	-1.6727e-05	0.980115	chr1	68824389			NA	NA
cg03162410	1.05613e-08	1.03355e-05	0.284105	chr19	14671422	TECR	Body	NA	NA
cg13066703	2.50281e-08	-1.11115e-05	0.232807	chr1	211526705	TRAF5;TRAF5;TRAF5	Body;Body;Body	NA	NA
cg12562461	3.10344e-08	9.75998e-06	0.812586	chr17	62778131	LOC146880;LOC146880	TSS1500;TSS200	NA	NA
cg10829227	4.86457e-08	1.38813e-05	0.943846	chr19	47200595	PRKD2;PRKD2;PRKD2;PRKD2	Body;Body;Body;Body	NA	NA
cg20068209	5.18633e-08	-1.37344e-05	0.330333	chr6	75988568	TMEM30A;TMEM30A	Body;Body	NA	NA
cg12723026	6.05393e-08	1.96123e-05	0.0722367	chr1	110764594	KCNC4;KCNC4;KCNC4	Body;Body;Body	NA	NA
cg07103722	7.4771e-08	-8.13515e-06	0.912714	chr6	31370532	MICA	TSS1500	NA	NA
cg24674703	7.58351e-08	-1.30175e-05	0.0622714	chr11	60869960	CD5;CD5	5'UTR;1stExon	NA	NA
cg04411893	9.87611e-08	-8.40976e-06	0.809449	chr3	185300709			NA	NA

## Sheet: Supp Table 3
4,299 gestational age associated DMPs were identified at a threshold of P < 1x10-7. Genomic locations are based on hg19.
ProbeID	EWAS of gestational age (weeks)		EWAS of gestational age (weeks) X ASD	Chr	Pos	Gene Annotation		ARIES EWAS of gestational age (weeks)
	P-value	Regression coefficient	P-value			UCSC RefGene Name	UCSC RefGene Group	t-statistic	P-value
cg11932158	2.34569e-57	-0.0195682	0.539944	chr3	155422129	PLCH1	TSS200	NA	NA
cg02001279	5.85567e-52	-0.0185655	0.860262	chr19	940967	ARID3A	Body	NA	NA
cg18623216	5.17625e-49	-0.0162207	0.660576	chr3	155421970	PLCH1;PLCH1	5'UTR;1stExon	NA	NA
cg04685228	4.89887e-48	-0.0147661	0.0594782	chr5	172462626			-8.94	3.2e-18
cg18598117	5.07948e-47	-0.0207536	0.42733	chr19	941126	ARID3A	Body	NA	NA
cg08817867	6.81838e-46	-0.0119297	0.666144	chr17	19656554			NA	NA
cg16103712	7.26986e-46	-0.0182475	0.382267	chr8	99023869	MATN2;MATN2	Body;Body	NA	NA
cg20334115	5.86559e-44	-0.0181551	0.368151	chr1	226107899	PYCR2	3'UTR	NA	NA
cg02430430	8.65336e-43	-0.0103829	0.827466	chr15	74532450	CCDC33	Body	NA	NA
cg12713583	1.29255e-42	-0.0199936	0.691144	chr19	940724	ARID3A	Body	-7.55	1.3e-13
cg23541926	8.10698e-42	-0.0179344	0.201542	chr3	155422092	PLCH1	TSS200	NA	NA
cg08943494	1.04429e-41	-0.0230759	0.134556	chr11	36422615	PRR5L;PRR5L;PRR5L;PRR5L;PRR5L	5'UTR;5'UTR;1stExon;5'UTR;Body	NA	NA
cg04347477	1.75809e-41	-0.0209429	0.415874	chr12	125002007	NCOR2;NCOR2	5'UTR;5'UTR	NA	NA
cg20068209	2.00248e-41	-0.0119591	0.885223	chr6	75988568	TMEM30A;TMEM30A	Body;Body	-5.7	1.8e-08
cg01154283	6.93379e-40	-0.0102895	0.657152	chr2	36603543	CRIM1	Body	-8.12	2e-15
cg01394781	1.35716e-37	-0.01267	0.538827	chr16	16214213	ABCC1;ABCC1;ABCC1;ABCC1;ABCC1	Body;Body;Body;Body;Body	-6.27	6.1e-10
cg07738730	2.99548e-37	0.0131455	0.215087	chr17	47077165	IGF2BP1;IGF2BP1	Body;Body	NA	NA
cg26690511	5.63657e-37	-0.0166279	0.657693	chr3	155422103	PLCH1	TSS200	NA	NA
cg26077811	3.22628e-36	0.0101502	0.949842	chr11	119232263	USP2;USP2	Body;Body	5.87	6.7e-09
cg13066703	3.68375e-36	-0.00874282	0.0465715	chr1	211526705	TRAF5;TRAF5;TRAF5	Body;Body;Body	NA	NA
cg17133774	6.14154e-36	-0.0131718	0.035411	chr1	6198667	CHD5	Body	NA	NA
cg08726900	1.58394e-34	-0.0133788	0.0954881	chr16	89550474	ANKRD11	5'UTR	-7.16	2e-12
cg00889363	1.65297e-34	0.0089954	0.111256	chr2	206255841	PARD3B;PARD3B;PARD3B	Body;Body;Body	5.74	1.4e-08
cg04730825	2.31056e-34	-0.010584	0.11022	chr16	16116191	ABCC1;ABCC1;ABCC1;ABCC1;ABCC1	Body;Body;Body;Body;Body	NA	NA
cg27295118	4.63837e-34	-0.0171007	0.0227025	chr14	22902226			-6.84	1.6e-11
cg13924996	5.11463e-34	-0.011878	0.356146	chr11	67053829	ADRBK1	3'UTR	-7.87	1.3e-14
cg16356456	5.80237e-34	-0.012052	0.467398	chr7	73720870	CLIP2;CLIP2	5'UTR;5'UTR	NA	NA
cg23062810	1.34915e-33	-0.011976	0.966283	chr7	73720808	CLIP2;CLIP2	5'UTR;5'UTR	NA	NA
cg13492133	2.06404e-33	0.0101934	0.333289	chr1	183516266	SMG7;SMG7;SMG7	Body;Body;Body	NA	NA
cg05294455	3.69792e-33	0.00955271	0.767122	chr17	45286609	MYL4;MYL4	5'UTR;TSS200	5.71	1.6e-08
cg05969150	3.97195e-33	-0.0111781	0.779864	chr16	72882495	ZFHX3;ZFHX3	Body;Body	NA	NA
cg07835443	2.22024e-32	-0.0155	0.809764	chr16	89734986	C16orf55	Body	NA	NA
cg27518892	4.92327e-32	-0.00961815	0.983456	chr16	57566936	CCDC102A	5'UTR	NA	NA
cg04276536	2.28016e-31	-0.00737758	0.473326	chr16	57567813	CCDC102A	5'UTR	NA	NA
cg10020892	1.1681e-30	-0.00869972	0.790793	chr1	147016901	BCL9	5'UTR	-6.37	3.4e-10
cg18183624	1.96045e-30	0.0147094	0.334309	chr17	47076904	IGF2BP1;IGF2BP1	Body;Body	6.67	5.1e-11
cg21155834	4.15411e-30	-0.00554376	4.1056e-05	chr2	149282209			-5.77	1.2e-08
cg11360522	4.39935e-30	-0.00997667	0.310729	chr13	113379828	ATP11A;ATP11A	Body;Body	NA	NA
cg04521626	7.31146e-30	-0.0105388	0.659251	chr17	4714200	PLD2	Body	NA	NA
cg23482898	1.64687e-29	-0.00737397	0.0209882	chr3	12858887	CAND2;CAND2	Body;Body	NA	NA
cg12970171	1.76554e-29	-0.0080251	0.742188	chr5	6766613			NA	NA
cg04213841	1.85104e-29	0.017289	0.682646	chr13	49792685			NA	NA
cg05283597	3.57148e-29	-0.0132974	0.0417796	chr3	52812410	ITIH1;ITIH1	TSS200;Body	NA	NA
cg02017450	5.94752e-29	-0.0144893	0.0296332	chr10	10631670			-5.52	4.8e-08
cg11882607	6.64472e-29	-0.00898297	0.108389	chr3	12858926	CAND2;CAND2	Body;Body	-5.41	8.6e-08
cg00220721	7.50967e-29	-0.0149932	0.168759	chr11	36422443	PRR5L;PRR5L;PRR5L;PRR5L	5'UTR;5'UTR;TSS200;Body	NA	NA
cg19913563	1.96907e-28	-0.0112623	0.453163	chr6	30720261			-5.78	1.1e-08
cg05077231	2.11377e-28	0.0108259	0.267937	chr13	49793054	MLNR	TSS1500	NA	NA
cg22117805	2.55021e-28	-0.018257	0.0391325	chr11	36422455	PRR5L;PRR5L;PRR5L;PRR5L	5'UTR;5'UTR;TSS200;Body	-8.62	4.3e-17
cg04494800	6.41649e-28	-0.00943611	0.154731	chr6	149775853	ZC3H12D	Body	-6.88	1.3e-11
cg06870470	6.92671e-28	-0.010689	0.738441	chr19	11315767	DOCK6	Body	NA	NA
cg04272820	1.48166e-27	-0.00832994	0.157142	chr17	38228538	THRA;THRA	5'UTR;5'UTR	NA	NA
cg21926626	1.81229e-27	-0.0124444	0.416313	chr8	143382226	TSNARE1	Body	NA	NA
cg24024661	3.67636e-27	-0.0119148	0.739445	chr19	1074425	HMHA1	Body	-7.05	4.2e-12
cg16725984	3.84638e-27	-0.0180387	0.304641	chr16	89735184	C16orf55	Body	NA	NA
cg11873462	1.71401e-26	-0.0138077	0.013251	chr8	144611940	ZC3H3	Body	-6.51	1.4e-10
cg02571874	1.90688e-26	-0.00840429	0.188245	chr3	12799985	TMEM40	5'UTR	NA	NA
cg11854981	1.92297e-26	-0.0103183	0.298145	chr6	42219847	TRERF1	Body	-6.9	1.1e-11
cg24296397	3.7542e-26	-0.0106254	0.321647	chr3	49692537	BSN	Body	NA	NA
cg22000727	7.44932e-26	0.00744101	0.252019	chr6	3459199			NA	NA
cg03930153	8.04714e-26	-0.0129553	0.530376	chr3	176868896	TBL1XR1	5'UTR	-5.39	9.8e-08
cg06396119	9.69951e-26	0.0133717	0.340265	chr13	49792767			NA	NA
cg05581878	1.66075e-25	-0.00814312	0.612118	chr3	159886981			-5.41	8.7e-08
cg09915396	1.84681e-25	-0.00788494	0.724226	chr17	2907895	RAP1GAP2;RAP1GAP2	Body;Body	NA	NA
cg10397819	2.53355e-25	0.00611841	0.582926	chr14	75447512			NA	NA
cg07810039	3.22537e-25	-0.0106421	0.499122	chr1	218524558	TGFB2;TGFB2	Body;Body	-6.7	4.2e-11
cg20076442	3.23318e-25	-0.0108432	0.575941	chr8	72745197			NA	NA
cg27652459	3.46568e-25	-0.0079361	0.203117	chr11	46709238	ARHGAP1	Body	NA	NA
cg08576185	4.04576e-25	-0.0120971	0.515456	chr16	2055684	ZNF598	Body	NA	NA
cg04902474	4.08088e-25	-0.0074113	0.845224	chr1	33233473	KIAA1522	Body	-6.19	1e-09
cg23009780	4.42393e-25	0.0082896	0.737558	chr2	96774492			NA	NA
cg21374307	6.01202e-25	-0.00979866	0.732558	chr3	159547539	SCHIP1	Body	-6.12	1.5e-09
cg06472341	7.75951e-25	-0.00639145	0.561526	chr11	1073641	MUC2	TSS1500	NA	NA
cg27471246	9.25851e-25	-0.00770223	0.847896	chr21	39776434	ERG;ERG;ERG;ERG	Body;Body;Body;Body	NA	NA
cg23889047	1.02334e-24	-0.0103035	0.853742	chr1	7705756	CAMTA1	Body	NA	NA
cg26027170	1.03282e-24	-0.00639471	0.0297857	chr17	37394705			-6.59	8.6e-11
cg02637282	1.27746e-24	-0.010134	0.133587	chr12	98768240			NA	NA
cg03047995	1.54583e-24	-0.00915307	0.320453	chr14	24601588	FITM1	Body	NA	NA
cg03619256	2.85628e-24	-0.00680436	0.137331	chr7	105515219	ATXN7L1;ATXN7L1	Body;Body	NA	NA
cg10535320	4.5095e-24	-0.00636571	0.885141	chr17	61908869	PSMC5	Body	NA	NA
cg27448161	4.58964e-24	-0.00605689	0.818163	chr12	53472792	SPRYD3	Body	-8.2	1.1e-15
cg13283635	6.81383e-24	-0.00947229	0.245907	chr20	61450653	COL9A3	Body	-6.42	2.4e-10
cg05820066	7.10847e-24	-0.00754841	0.347247	chr16	75145843	LDHD;LDHD	3'UTR;3'UTR	-6.46	2e-10
cg07338715	1.00139e-23	-0.00845869	0.0158188	chr2	109649281			NA	NA
cg25362050	1.34537e-23	-0.00570791	0.731111	chr17	38470900	RARA	5'UTR	NA	NA
cg18897025	1.50436e-23	-0.0101684	0.456714	chr5	110413671	TSLP;TSLP	3'UTR;3'UTR	NA	NA
cg25363679	1.99144e-23	0.00914629	0.104666	chr12	71031202	PTPRB;PTPRB	5'UTR;1stExon	NA	NA
cg15908709	2.50186e-23	0.00860881	0.698896	chr17	46676215	LOC404266;LOC404266;LOC404266;LOC404266;HOXB6;LOC404266	Body;Body;Body;Body;5'UTR;Body	NA	NA
cg11934771	2.75612e-23	-0.00699624	0.239166	chr6	31021796	HCG22	TSS200	NA	NA
cg18608055	3.12827e-23	-0.00992448	0.396992	chr19	1130866	SBNO2;SBNO2	Body;Body	-7.24	1.1e-12
cg19439123	4.68178e-23	-0.0108228	0.930519	chr17	17687621	RAI1	5'UTR	NA	NA
cg00481600	4.71896e-23	-0.00740531	0.932275	chr15	65503829	CILP;CILP	5'UTR;1stExon	-7.73	3.7e-14
cg01229865	5.11929e-23	-0.0112575	0.355577	chr13	113528751	ATP11A;ATP11A	Body;Body	-6.54	1.1e-10
cg03940776	5.73043e-23	-0.00684699	0.227108	chr6	158490013	SYNJ2	Body	-6.77	2.7e-11
cg13100137	7.02583e-23	-0.00717958	0.323135	chr1	37937945			NA	NA
cg15030415	8.01986e-23	-0.00885154	0.197237	chr17	2908068	RAP1GAP2;RAP1GAP2	Body;Body	NA	NA
cg01194073	1.48438e-22	0.00467824	0.0803491	chr14	101175302			NA	NA
cg04632887	1.55689e-22	-0.0116793	0.790636	chr20	3065559	AVP	TSS200	NA	NA
cg23385718	1.73488e-22	0.00686429	0.866438	chr7	18127029			NA	NA
cg03485667	1.96974e-22	-0.00775686	0.20336	chr16	75143200	ZNRF1	3'UTR	-5.45	7e-08
cg15013617	2.08832e-22	-0.00989008	0.343834	chr20	2795378	C20orf141	TSS1500	NA	NA
cg20258698	2.49523e-22	-0.0111483	0.777717	chr7	47556811	TNS3	5'UTR	NA	NA
cg15659420	2.60737e-22	-0.0105531	0.596087	chr11	20034979	NAV2;NAV2;NAV2	Body;Body;Body	NA	NA
cg27184903	3.58903e-22	0.00752617	0.732544	chr15	29285727	APBA2;APBA2	5'UTR;5'UTR	NA	NA
cg12036735	3.97538e-22	-0.00870072	0.3221	chr8	20169916			NA	NA
cg22828383	5.16919e-22	-0.0126436	0.13168	chr12	125002191	NCOR2;NCOR2	5'UTR;5'UTR	NA	NA
cg03048432	5.62622e-22	-0.00856167	0.5543	chr14	51290751	NIN;NIN;NIN;NIN	5'UTR;5'UTR;TSS1500;5'UTR	-6.55	1.1e-10
cg00989249	6.00505e-22	-0.0088509	0.703422	chr5	177548398	N4BP3	Body	NA	NA
cg13036381	6.0149e-22	0.0154524	0.155617	chr3	159942495	LOC401097	TSS1500	NA	NA
cg00086710	6.93675e-22	-0.00995177	0.870116	chr4	89204074	PPM1K	5'UTR	NA	NA
cg13447080	7.48273e-22	-0.00662114	0.332788	chr8	131054408			NA	NA
cg08610901	7.64633e-22	-0.0107793	0.269864	chr7	3186766			NA	NA
cg24166457	9.75157e-22	-0.0101634	0.347043	chr19	45590882	GEMIN7;GEMIN7;GEMIN7	5'UTR;5'UTR;5'UTR	NA	NA
cg01185345	1.04687e-21	-0.00678788	0.139744	chr13	99218287	STK24	Body	NA	NA
cg07398517	1.09148e-21	-0.00747268	0.365934	chr3	30327579			NA	NA
cg16834726	1.12895e-21	-0.00865613	0.36077	chr12	57937408	DCTN2	Body	-7.41	3.6e-13
cg08915038	1.24885e-21	-0.00725227	0.979047	chr1	16562923	C1orf89	Body	NA	NA
cg10713589	1.56748e-21	-0.0118091	0.463857	chr4	119989952			-5.44	7.5e-08
cg12064202	1.74792e-21	0.00777995	0.368703	chr6	31038842			NA	NA
cg02571436	1.91974e-21	-0.0073902	0.220036	chr10	77468337			-5.87	6.6e-09
cg14997707	2.11055e-21	0.0083547	0.520475	chr7	93853120			NA	NA
cg15690760	2.16826e-21	-0.0110988	0.230399	chr5	6729662	POLS	5'UTR	NA	NA
cg22867816	3.05519e-21	-0.00941524	0.313831	chr4	16081205	PROM1;PROM1	5'UTR;5'UTR	NA	NA
cg08654091	3.24268e-21	0.00999874	0.831477	chr1	227015418			5.89	6e-09
cg02753354	3.25779e-21	-0.00716955	0.200218	chr19	1074727	HMHA1	Body	NA	NA
cg02137956	3.2898e-21	-0.00906025	0.763318	chr7	157092982			NA	NA
cg20294319	3.35677e-21	-0.00708734	0.47165	chr13	47253842	LRCH1;LRCH1;LRCH1	Body;Body;Body	NA	NA
cg19103429	3.60234e-21	-0.00894621	0.953168	chr7	92460784	CDK6;CDK6	Body;Body	NA	NA
cg19233405	3.83518e-21	-0.00767817	0.201603	chr1	154988721	ZBTB7B	Body	NA	NA
cg26269677	4.54874e-21	-0.00893983	0.428555	chr5	76251688	CRHBP	Body	NA	NA
cg12629515	4.7504e-21	0.0136586	0.19113	chr6	27859811	HIST1H3J;HIST1H2BO	TSS1500;TSS1500	NA	NA
cg19075787	5.49939e-21	-0.00920261	0.194657	chr2	105372087			NA	NA
cg08731696	5.87331e-21	0.0123897	0.548933	chr1	59280489			NA	NA
cg14527110	6.42462e-21	-0.00566798	0.997889	chr5	131561292	P4HA2;P4HA2;P4HA2;P4HA2;P4HA2	5'UTR;5'UTR;5'UTR;5'UTR;5'UTR	NA	NA
cg03295554	6.70128e-21	-0.0106544	0.574955	chr11	128395450	ETS1	Body	NA	NA
cg18681014	7.02158e-21	-0.00941784	0.216872	chr14	105660876			-6.09	1.9e-09
cg07136133	7.04075e-21	-0.0136302	0.207822	chr11	36422377	PRR5L;PRR5L;PRR5L;PRR5L	5'UTR;5'UTR;TSS200;Body	-7.8	2.2e-14
cg08217545	9.37379e-21	-0.0098433	0.322356	chr19	3388013	NFIC;NFIC	Body;Body	NA	NA
cg00739778	1.01466e-20	-0.0098424	0.429701	chr17	2908023	RAP1GAP2;RAP1GAP2	Body;Body	NA	NA
cg00382138	1.26668e-20	-0.00960826	0.845609	chr4	110723299	CFI;CFI	1stExon;5'UTR	NA	NA
cg02951357	1.43729e-20	0.00675917	0.622044	chr1	59280619			NA	NA
cg20593826	2.11339e-20	0.011698	0.297297	chr1	59280370			NA	NA
cg07144984	2.44753e-20	-0.00970656	0.478451	chr3	114864747	ZBTB20	5'UTR	NA	NA
cg09982224	2.594e-20	-0.00796824	0.935579	chr11	67775972	ALDH3B1	TSS200	NA	NA
cg04313735	3.0126e-20	0.00650019	0.716846	chr11	73357194	PLEKHB1;PLEKHB1;PLEKHB1;PLEKHB1	TSS200;TSS200;TSS1500;TSS1500	NA	NA
cg06897661	3.49359e-20	-0.00764963	0.700083	chr16	50322074	ADCY7;ADCY7	5'UTR;1stExon	NA	NA
cg19169154	3.86269e-20	-0.00524911	0.588672	chr17	19287978	MFAP4	Body	NA	NA
cg10239319	4.43582e-20	-0.00925256	0.26143	chr4	6073656	JAKMIP1;JAKMIP1	Body;Body	-7.06	3.8e-12
cg20156985	4.91117e-20	0.00571391	0.756982	chr1	33694609			NA	NA
cg07638500	4.93549e-20	0.00749939	0.913773	chr3	123371420	MYLK;MYLK;MYLK;MYLK	Body;Body;Body;Body	NA	NA
cg14387452	6.16859e-20	-0.00556815	0.803852	chr9	20512334	MLLT3	Body	NA	NA
cg19744173	8.40602e-20	-0.00688914	0.0623463	chr2	112913178	FBLN7;FBLN7	Body;Body	NA	NA
cg17178761	8.44524e-20	-0.00758903	0.0693596	chr17	55682851	MSI2;MSI2	Body;Body	-5.75	1.3e-08
cg07985890	8.48831e-20	-0.0156795	0.332343	chr11	65190999	NEAT1	Body	NA	NA
cg16536918	8.71304e-20	-0.00996173	0.605839	chr20	3065403	AVP	TSS200	-5.75	1.4e-08
cg07480762	9.4774e-20	-0.0123849	0.439266	chr3	155422145	PLCH1	TSS200	NA	NA
cg10728351	1.09129e-19	-0.0112985	0.112888	chr4	122628020			NA	NA
cg10343364	1.12961e-19	-0.00717775	0.30171	chr16	3559568	CLUAP1;CLUAP1	Body;TSS1500	NA	NA
cg22820108	1.25068e-19	-0.00761339	0.493586	chr12	125003218	NCOR2;NCOR2	5'UTR;5'UTR	NA	NA
cg07749613	1.54146e-19	-0.00431341	0.332803	chr2	97073539			NA	NA
cg26024874	1.75058e-19	0.00665383	0.967568	chr18	54541128	WDR7;WDR7	Body;Body	NA	NA
cg03074244	1.99746e-19	0.00704593	0.203031	chr11	118213414	CD3D;CD3D;CD3D;CD3D	5'UTR;5'UTR;1stExon;1stExon	NA	NA
cg14214856	2.02418e-19	-0.00765937	0.0107599	chr10	36965362			NA	NA
cg12999267	2.43244e-19	-0.00545459	0.0521833	chr12	94376970			NA	NA
cg15967278	2.54944e-19	-0.00834535	0.335779	chr8	29886272			NA	NA
cg10068437	2.56822e-19	0.00605	0.78851	chr7	18126994			NA	NA
cg05660874	2.66808e-19	-0.00699105	0.504523	chr19	2332485	SPPL2B;SPPL2B	Body;Body	NA	NA
cg24914185	2.90328e-19	-0.00576344	0.603181	chr2	200663789			-6.17	1.1e-09
cg01076459	3.0542e-19	-0.00705436	0.258217	chr17	2908230	RAP1GAP2;RAP1GAP2	Body;Body	NA	NA
cg07408552	3.43125e-19	-0.00617058	0.105869	chr17	40611995	ATP6V0A1;ATP6V0A1;ATP6V0A1	5'UTR;5'UTR;5'UTR	NA	NA
cg19136673	4.27425e-19	-0.00546208	0.850465	chr6	32813337	PSMB8;TAP1	TSS1500;3'UTR	NA	NA
cg24261333	4.52933e-19	0.00689273	0.307531	chr11	73357019	PLEKHB1;PLEKHB1	TSS1500;TSS1500	NA	NA
cg06245338	4.83232e-19	-0.00663339	0.549196	chr17	74410839	UBE2O	Body	NA	NA
cg06832008	5.16759e-19	0.00377477	0.231576	chr6	105401339			NA	NA
cg26049998	5.41892e-19	-0.00594378	0.202233	chr17	65602730	PITPNC1;PITPNC1	Body;Body	NA	NA
cg09233395	5.91295e-19	-0.00917163	0.0135851	chr8	116678582	TRPS1	5'UTR	NA	NA
cg23169111	6.70817e-19	-0.00626673	0.909834	chr20	3065582	AVP	TSS1500	-6.24	7.3e-10
cg10493186	7.80684e-19	-0.00969322	0.10992	chr1	3134756	PRDM16;PRDM16	Body;Body	-5.74	1.4e-08
cg25426302	8.7973e-19	0.0139644	0.991058	chr6	32120826	PPT2;PRRT1;PPT2	TSS1500;TSS1500;TSS1500	NA	NA
cg22761205	8.80298e-19	-0.00720532	0.677358	chr11	457256	PTDSS2	Body	NA	NA
cg20229014	8.93018e-19	-0.00462795	0.394877	chr8	134529378	ST3GAL1;ST3GAL1	5'UTR;5'UTR	NA	NA
cg01429256	1.04242e-18	-0.00617301	0.383351	chr17	17687834	RAI1	5'UTR	NA	NA
cg06518251	1.11922e-18	-0.00589263	0.575051	chr11	67776030	ALDH3B1	TSS200	NA	NA
cg09888330	1.16653e-18	0.00531667	0.402012	chr1	156786010	SH2D2A;NTRK1;SH2D2A;SH2D2A;SH2D2A;SH2D2A	Body;Body;TSS200;Body;Body;Body	NA	NA
cg04549583	1.36944e-18	-0.00370024	0.00375446	chr2	12146219			NA	NA
cg17313709	1.52081e-18	-0.0102169	0.178084	chr14	22902298			NA	NA
cg19723805	1.6143e-18	-0.00800408	0.209075	chr5	33147539			-5.83	8.4e-09
cg14377059	1.79762e-18	-0.0070455	0.289306	chr1	59183881			NA	NA
cg09121543	1.82344e-18	-0.00765471	0.166625	chr17	61774794	LIMD2	3'UTR	NA	NA
cg10549018	1.83231e-18	-0.00505468	0.475671	chr10	98176740	TLL2	Body	NA	NA
cg21228424	1.83743e-18	0.0111512	0.398438	chr6	42678314	PRPH2	Body	NA	NA
cg24279744	2.14218e-18	0.00655505	0.416414	chr3	10408402	ATP2B2;ATP2B2	Body;Body	NA	NA
cg22786748	2.21971e-18	0.00806348	0.786629	chr6	31034042			NA	NA
cg01930719	2.34272e-18	-0.0069297	0.354576	chr16	67575562	FAM65A	Body	NA	NA
cg27106909	2.38389e-18	-0.00628707	0.765407	chr16	30106897	YPEL3;YPEL3;YPEL3	1stExon;5'UTR;5'UTR	-5.48	5.9e-08
cg02254407	2.5397e-18	0.00891073	0.934736	chr11	73357159	PLEKHB1;PLEKHB1;PLEKHB1;PLEKHB1	TSS200;TSS200;TSS1500;TSS1500	NA	NA
cg01324550	2.9885e-18	0.00700743	0.880647	chr17	46676099	LOC404266;LOC404266;LOC404266;LOC404266;HOXB6;LOC404266	Body;Body;Body;Body;5'UTR;Body	NA	NA
cg07807026	3.07348e-18	-0.00691455	0.993623	chr12	2041581			NA	NA
cg23235671	3.63568e-18	0.00706589	0.112458	chr2	128617901			NA	NA
cg01894038	3.68076e-18	-0.00572279	0.598781	chr11	77741873			NA	NA
cg10714639	3.73125e-18	-0.0112053	0.894632	chr19	1075104	HMHA1	Body	NA	NA
cg09091752	3.98412e-18	-0.00489288	0.700497	chr15	41080358	DNAJC17	Body	-5.48	5.7e-08
cg17924072	4.01003e-18	-0.0075383	0.101585	chr19	1075067	HMHA1	Body	NA	NA
cg24746726	4.40482e-18	-0.00853834	0.820763	chr4	70726093	SULT1E1	TSS1500	NA	NA
cg00522276	4.67722e-18	-0.00816548	0.334914	chr8	67452722			NA	NA
cg17837526	4.83695e-18	-0.00558169	0.809491	chr5	172410489	ATP6V0E1	TSS1500	NA	NA
cg21842274	4.92735e-18	-0.009078	0.773249	chr5	76248637	CRHBP	TSS200	-5.51	5.1e-08
cg14905320	5.00642e-18	0.00580422	0.512977	chr4	79339096	FRAS1;FRAS1	Body;Body	NA	NA
cg21081878	5.05387e-18	-0.00998092	0.530346	chr21	38334730	HLCS	5'UTR	NA	NA
cg27140633	5.16911e-18	0.00802177	0.553318	chr11	63685905			NA	NA
cg17149103	5.48089e-18	0.00901716	0.0287119	chr1	147789480			NA	NA
cg12342675	5.99619e-18	-0.00834504	0.955828	chr10	60411127	BICC1	Body	NA	NA
cg22539182	6.17415e-18	-0.00725887	0.283509	chr10	850393			NA	NA
cg19576697	6.28152e-18	-0.00631737	0.561337	chr5	176837920	F12	TSS1500	NA	NA
cg26607031	6.82569e-18	-0.00938866	0.921313	chr1	9602701	SLC25A33	Body	NA	NA
cg15403198	6.93183e-18	0.00566137	0.859067	chr6	41410759			NA	NA
cg04999352	7.55077e-18	-0.00673771	0.880964	chr11	63304614	RARRES3	Body	NA	NA
cg27281690	7.81634e-18	-0.0059532	0.393829	chr2	7171963	RNF144A	Body	NA	NA
cg26926221	7.81681e-18	-0.00816219	0.125719	chr6	144698834	UTRN	Body	NA	NA
cg07651048	8.0532e-18	0.00530365	0.665779	chr12	49735444			NA	NA
cg25702652	8.0805e-18	0.00678798	0.889073	chr2	164204628			NA	NA
cg22784595	8.56505e-18	0.00785952	0.348437	chr10	7455714			NA	NA
cg15961007	8.57236e-18	-0.00640316	0.139146	chr6	153023279	MYCT1	Body	-5.59	3.1e-08
cg26224354	8.73708e-18	-0.00870279	0.41118	chr7	1096374	C7orf50;C7orf50;GPR146;C7orf50	Body;Body;TSS1500;Body	NA	NA
cg16151538	8.83299e-18	-0.00549881	0.8271	chr20	33676388	TRPC4AP;TRPC4AP	Body;Body	-5.76	1.2e-08
cg23005885	9.44173e-18	0.0101144	0.0683325	chr15	90543450	ZNF710	TSS1500	NA	NA
cg02992639	1.17549e-17	0.00761663	0.784417	chr1	155098827			NA	NA
cg16545105	1.18042e-17	-0.00786372	0.78483	chr5	76248749	CRHBP;CRHBP	1stExon;5'UTR	NA	NA
cg20889322	1.26324e-17	-0.00683744	0.15893	chr11	65196622			NA	NA
cg18951352	1.32246e-17	-0.00678687	0.0532543	chr6	149806077	ZC3H12D;ZC3H12D	5'UTR;1stExon	NA	NA
cg09168805	1.3242e-17	0.00820513	0.492328	chr1	94514548	ABCA4	Body	NA	NA
cg10357314	1.5269e-17	-0.0114955	0.0501463	chr11	94886261			NA	NA
cg25953130	1.54893e-17	-0.00988579	0.352577	chr10	63753550	ARID5B	Body	NA	NA
cg26203136	1.64944e-17	0.00967358	0.347507	chr7	739057	PRKAR1B;PRKAR1B;PRKAR1B;PRKAR1B;PRKAR1B;PRKAR1B	Body;Body;Body;Body;Body;Body	NA	NA
cg20782117	1.65812e-17	-0.00712499	0.311586	chr7	95865631	SLC25A13;SLC25A13;SLC25A13	Body;Body;Body	NA	NA
cg02152631	1.73194e-17	0.00523434	0.641432	chr8	29133647			NA	NA
cg21932231	1.93635e-17	-0.00827542	0.228093	chr2	36668864	CRIM1	Body	NA	NA
cg12587615	2.13378e-17	0.0123848	0.615989	chr19	11472397	LPPR2;LPPR2	Body;Body	NA	NA
cg09772299	2.21452e-17	0.00498252	0.37659	chr2	136783103			NA	NA
cg27110277	2.38851e-17	0.00740732	0.944383	chr8	16860121	FGF20	TSS1500	NA	NA
cg00186909	2.57104e-17	-0.00717729	0.552671	chr12	93129288	PLEKHG7	TSS1500	NA	NA
cg18875496	2.57825e-17	-0.00865485	0.694408	chr17	55338456	MSI2;MSI2	Body;Body	NA	NA
cg09653641	2.59004e-17	-0.0082673	0.459865	chr7	92455499	CDK6;CDK6	Body;Body	NA	NA
cg14289429	2.89482e-17	-0.00649706	0.216985	chr9	134139878	FAM78A	Body	NA	NA
cg26916780	3.12468e-17	-0.0063291	0.336113	chr15	64889554	ZNF609	Body	NA	NA
cg23839159	3.41829e-17	-0.007293	0.704348	chr1	43281794	CCDC23;ERMAP	Body;TSS1500	NA	NA
cg07749597	3.52335e-17	-0.00531131	0.881566	chr5	42840698			NA	NA
cg23754918	3.75711e-17	0.0102686	0.698339	chr7	2653733	IQCE;IQCE	3'UTR;3'UTR	NA	NA
cg02493846	3.92755e-17	-0.00658935	0.853525	chr1	151809534	LOC100132111	TSS1500	NA	NA
cg26724018	4.19493e-17	-0.00734692	0.661189	chr11	5716255	TRIM22	5'UTR	NA	NA
cg12063847	4.25251e-17	-0.00589682	0.483349	chr6	158184542			NA	NA
cg03271893	4.47604e-17	-0.00586652	0.54964	chr10	102760970	LZTS2	5'UTR	NA	NA
cg11376341	4.81091e-17	0.0101009	0.823673	chr10	21796152			NA	NA
cg02654940	4.88395e-17	0.00524478	0.780559	chr6	34206400	HMGA1;HMGA1;HMGA1;HMGA1;HMGA1;HMGA1	5'UTR;5'UTR;5'UTR;5'UTR;5'UTR;TSS200	NA	NA
cg19483007	4.91731e-17	0.00722196	0.114887	chr3	149327651	WWTR1;WWTR1;WWTR1	Body;Body;Body	NA	NA
cg16174106	5.08195e-17	-0.00856297	0.397728	chr1	210503830	HHAT;HHAT;HHAT;HHAT;HHAT;HHAT	5'UTR;5'UTR;5'UTR;5'UTR;5'UTR;Body	NA	NA
cg23355492	5.22947e-17	0.00706758	0.136101	chr17	45933593	SP6	TSS1500	NA	NA
cg02294302	5.38388e-17	0.00563924	0.532717	chr1	47906276	FOXD2;FOXD2	3'UTR;1stExon	NA	NA
cg10324998	5.50868e-17	0.00542196	0.888056	chr1	92338262	TGFBR3	5'UTR	NA	NA
cg07447742	5.65432e-17	0.00840454	0.211181	chr13	49793170	MLNR	TSS1500	NA	NA
cg20603222	5.72242e-17	-0.00838695	0.443847	chr7	1096387	C7orf50;C7orf50;GPR146;C7orf50	Body;Body;TSS1500;Body	NA	NA
cg09411730	5.82312e-17	-0.0169168	0.369866	chr11	65190946	NEAT1	Body	NA	NA
cg04878826	5.98933e-17	-0.00567202	0.812211	chr1	117398001			NA	NA
cg06379435	6.35116e-17	-0.00780451	0.384258	chr19	3344273			NA	NA
cg12063580	7.21037e-17	-0.00567865	0.273966	chr14	105783627	PACS2;PACS2	Body;Body	NA	NA
cg01368219	7.69728e-17	0.00739182	0.18211	chr3	54999791	CACNA2D3	Body	NA	NA
cg00093643	8.37207e-17	-0.00935223	0.146849	chr15	44579510	CASC4;CASC4	TSS1500;TSS1500	NA	NA
cg04859117	8.43436e-17	0.00457459	0.923862	chr11	2011341	LOC100133545	TSS200	NA	NA
cg20600850	8.65255e-17	-0.0048328	0.790039	chr12	6712515	CHD4	Body	NA	NA
cg18556420	8.68546e-17	-0.00681268	0.311471	chr10	864596	LARP4B	Body	NA	NA
cg14107488	8.8266e-17	-0.00896012	0.953661	chr4	7033722	TBC1D14;TBC1D14;TBC1D14	3'UTR;3'UTR;3'UTR	NA	NA
cg20112500	9.00295e-17	-0.00600329	0.890686	chr6	31021744	HCG22	TSS1500	NA	NA
cg00166343	1.04187e-16	-0.00558005	0.985381	chr17	29150100	CRLF3	Body	-7.11	2.8e-12
cg10723746	1.04907e-16	-0.00811361	0.256416	chr19	2332499	SPPL2B;SPPL2B	Body;Body	NA	NA
cg09476997	1.05281e-16	0.0150053	0.709904	chr16	2087932	SLC9A3R2;SLC9A3R2	Body;Body	NA	NA
cg23948843	1.1081e-16	0.00674857	0.525809	chr2	164204752			NA	NA
cg00232092	1.12249e-16	-0.00693091	0.698361	chr7	5518887	FBXL18	3'UTR	NA	NA
cg10623219	1.18764e-16	0.00898209	0.825688	chr12	52242807			NA	NA
cg26740249	1.20659e-16	-0.00915011	0.99261	chr17	76036514	TNRC6C;TNRC6C	5'UTR;5'UTR	NA	NA
cg22846826	1.32543e-16	-0.00389755	0.939172	chr7	4723927	FOXK1	Body	NA	NA
cg26871347	1.33705e-16	-0.00756893	0.842596	chr17	55371727	MSI2;MSI2	Body;Body	NA	NA
cg01921773	1.35303e-16	-0.00786674	0.118947	chr16	75661691	KARS;KARS	3'UTR;3'UTR	NA	NA
cg04037585	1.48559e-16	0.00805536	0.00381162	chr16	56231292	GNAO1;GNAO1	Body;Body	NA	NA
cg17738521	1.5094e-16	-0.00706699	0.499072	chr6	143224179	HIVEP2	5'UTR	NA	NA
cg05211189	1.56676e-16	-0.0100885	0.873221	chr16	2055403	ZNF598	Body	NA	NA
cg21333338	1.58956e-16	-0.00573833	0.292386	chr17	2808456	RAP1GAP2;RAP1GAP2	Body;Body	NA	NA
cg07813031	1.6377e-16	-0.0102255	0.808113	chr1	61298421			-6.25	7e-10
cg17113856	1.64331e-16	0.0102995	0.387798	chr6	32120895	PPT2;PRRT1;PPT2	TSS1500;TSS1500;TSS1500	NA	NA
cg11945297	1.77842e-16	0.00689594	0.612596	chr8	102514634	GRHL2	Body	NA	NA
cg27485596	1.8015e-16	-0.0103064	0.0923431	chr13	111829530	ARHGEF7;ARHGEF7;ARHGEF7;ARHGEF7	Body;5'UTR;Body;Body	NA	NA
cg10422709	2.08142e-16	0.00636173	0.800997	chr15	53083978			NA	NA
cg07145783	2.10894e-16	-0.00683859	0.219185	chr1	160855077	ITLN1	TSS200	NA	NA
cg17477052	2.15263e-16	-0.0140563	0.0396726	chr10	71596731	COL13A1;COL13A1;COL13A1;COL13A1;COL13A1;COL13A1;COL13A1;COL13A1;COL13A1;COL13A1;COL13A1;COL13A1;COL13A1;COL13A1;COL13A1;COL13A1;COL13A1;COL13A1;COL13A1;COL13A1	Body;Body;Body;Body;Body;Body;Body;Body;Body;Body;Body;Body;Body;Body;Body;Body;Body;Body;Body;Body	NA	NA
cg15462501	2.51776e-16	-0.0105516	0.570787	chr22	40437196			NA	NA
cg24247537	2.56965e-16	-0.00922554	0.806857	chr11	457278	PTDSS2	Body	NA	NA
cg13390284	2.7839e-16	-0.00580392	0.46666	chr1	65531864			NA	NA
cg25551168	2.84289e-16	-0.00758047	0.119487	chr20	3065343	AVP;AVP	5'UTR;1stExon	-5.71	1.7e-08
cg07090356	3.28612e-16	-0.00726851	0.248681	chr18	23668764	SS18;SS18	Body;Body	NA	NA
cg25642234	3.4459e-16	0.00662997	0.421356	chr12	14721092	PLBD1	TSS1500	NA	NA
cg08645860	3.62094e-16	-0.00737009	0.0229953	chr16	85969301			-7.01	5.4e-12
cg26385222	3.71739e-16	0.00640456	0.0813159	chr7	150497077	TMEM176B;TMEM176B;TMEM176A;TMEM176B;TMEM176B;TMEM176B	TSS1500;5'UTR;TSS1500;5'UTR;5'UTR;5'UTR	NA	NA
cg07013104	3.74813e-16	0.00569305	0.289743	chr11	73357095	PLEKHB1;PLEKHB1;PLEKHB1;PLEKHB1	TSS200;TSS200;TSS1500;TSS1500	NA	NA
cg05500734	3.80267e-16	0.00584028	0.639053	chr7	73437649			NA	NA
cg25850808	3.88287e-16	-0.00653616	0.111239	chr6	74405048	CD109;CD109;CD109	TSS1500;TSS1500;TSS1500	NA	NA
cg18082788	3.92605e-16	-0.00769097	0.558344	chr6	149806339	ZC3H12D	TSS200	NA	NA
cg12758082	4.14371e-16	-0.00485343	0.712189	chr13	113407769	ATP11A;ATP11A	Body;Body	NA	NA
cg19873297	4.23801e-16	0.0102056	0.756987	chr5	171616388	STK10	TSS1500	NA	NA
cg22877452	4.38828e-16	0.013829	0.539086	chr1	61517876			NA	NA
cg12697139	4.53195e-16	-0.00805811	0.712201	chr1	209571889			-6.53	1.2e-10
cg01133215	5.0186e-16	-0.00516817	0.317247	chr6	45399681	RUNX2;RUNX2;RUNX2	Body;Body;Body	NA	NA
cg13672800	5.07559e-16	-0.00608506	0.268231	chr20	2795194	C20orf141	TSS1500	NA	NA
cg23378033	5.08616e-16	-0.00716521	0.51462	chr12	65672031	MSRB3;MSRB3	TSS1500;TSS1500	-5.69	1.9e-08
cg00634542	5.36233e-16	0.00716895	0.323803	chr2	219254588	SLC11A1	Body	NA	NA
cg11093760	5.46178e-16	-0.00509228	0.436674	chr15	65503807	CILP;CILP	5'UTR;1stExon	NA	NA
cg27293155	6.0483e-16	0.00759432	0.816478	chr2	38044012			NA	NA
cg11386011	6.09742e-16	0.00802015	0.354787	chr6	32121156	PPT2;PPT2;PRRT1	TSS200;TSS1500;TSS1500	NA	NA
cg11327857	6.20417e-16	0.0051978	0.743875	chr4	123747558	FGF2	TSS1500	NA	NA
cg14171369	6.28182e-16	0.00747821	0.145055	chr14	75447688			NA	NA
cg18816534	7.51194e-16	0.00738387	0.115255	chr5	158385443	EBF1	Body	NA	NA
cg16684817	7.55284e-16	-0.00882616	0.536529	chr1	28202173	C1orf38;C1orf38;C1orf38	Body;Body;Body	NA	NA
cg10975897	7.61264e-16	-0.00788228	0.508059	chr6	15504844	JARID2	Body	NA	NA
cg19295068	7.73605e-16	-0.0100873	0.841605	chr19	48206119	GLTSCR1	3'UTR	NA	NA
cg08305575	7.84879e-16	-0.00740932	0.215087	chr5	158018481			NA	NA
cg24633390	8.07678e-16	-0.00541427	0.232879	chr1	173159746	TNFSF4	Body	NA	NA
cg11387340	8.22191e-16	-0.00658623	0.0693408	chr6	166970727	RPS6KA2;RPS6KA2	Body;Body	NA	NA
cg02956248	8.34451e-16	0.0159371	0.802376	chr6	32120901	PPT2;PRRT1;PPT2	TSS1500;TSS1500;TSS1500	NA	NA
cg24159436	8.66344e-16	-0.00842965	0.346642	chr3	16974681	PLCL2;PLCL2;PLCL2	1stExon;Body;5'UTR	-6.01	3e-09
cg08369079	8.86393e-16	-0.0102562	0.137184	chr6	106551623	PRDM1;PRDM1	Body;Body	NA	NA
cg13305823	8.88118e-16	-0.0061739	0.540358	chr6	29454557	MAS1L	1stExon	NA	NA
cg14154456	9.55922e-16	-0.0101599	0.600774	chr6	82946781	IBTK	Body	NA	NA
cg13641317	9.72186e-16	-0.00626219	0.263238	chr3	127255552			NA	NA
cg26776957	1.02021e-15	0.00729599	0.381954	chr11	73357183	PLEKHB1;PLEKHB1;PLEKHB1;PLEKHB1	TSS200;TSS200;TSS1500;TSS1500	NA	NA
cg23291039	1.02947e-15	0.00556025	0.501154	chr4	25808901	SEL1L3	Body	NA	NA
cg05648303	1.0671e-15	-0.00966431	0.642015	chr4	141264393	SCOC;SCOC;SCOC;SCOC;SCOC	5'UTR;TSS1500;TSS1500;TSS1500;TSS1500	NA	NA
cg23523668	1.08509e-15	-0.00725182	0.613791	chr11	65194989			NA	NA
cg20072118	1.14959e-15	-0.00799634	0.85923	chr12	52653637			NA	NA
cg05059607	1.16826e-15	-0.00954311	0.145922	chr17	65488100	PITPNC1;PITPNC1	Body;Body	NA	NA
cg10426370	1.17729e-15	0.0064165	0.122829	chr5	54282459	ESM1;ESM1	TSS1500;TSS1500	NA	NA
cg22218709	1.2857e-15	-0.00345431	0.995742	chr7	4723740	FOXK1	Body	NA	NA
cg26677004	1.34767e-15	0.00615893	0.854337	chr1	179787968			NA	NA
cg08282819	1.718e-15	-0.0081797	0.839122	chr16	27437900	IL21R;IL21R;IL21R	TSS1500;5'UTR;5'UTR	NA	NA
cg24176731	1.77815e-15	0.00745477	0.746261	chr11	73357164	PLEKHB1;PLEKHB1;PLEKHB1;PLEKHB1	TSS200;TSS200;TSS1500;TSS1500	NA	NA
cg09170311	1.7817e-15	0.0050157	0.438823	chr11	111385778	C11orf88;C11orf88	Body;Body	NA	NA
cg20327845	1.79083e-15	-0.0124959	0.533185	chr10	3138418	PFKP	Body	NA	NA
cg19049607	1.79701e-15	-0.00623662	0.0246742	chr12	12764333	CREBL2	TSS1500	NA	NA
cg16519217	1.80314e-15	0.00741431	0.28842	chr6	31038713			NA	NA
cg11118235	1.85051e-15	-0.00459368	0.312135	chr3	50284010	GNAI2;GNAI2	TSS1500;Body	NA	NA
cg13380995	1.89243e-15	0.00476439	0.219367	chr6	37670128			NA	NA
cg01143454	1.95561e-15	-0.00786095	0.0556755	chr20	2795601	C20orf141;LOC100288797	TSS200;TSS1500	-5.43	7.8e-08
cg14258501	1.96792e-15	-0.00758459	0.920175	chr6	31680228	LY6G6E;LY6G6E	Body;Body	NA	NA
cg17239103	2.01609e-15	0.00615266	0.185495	chr1	159870074	CCDC19	TSS200	NA	NA
cg18402166	2.01704e-15	0.00599238	0.00904206	chr17	62778279	LOC146880;LOC146880	TSS1500;TSS200	NA	NA
cg09570614	2.07845e-15	0.00551795	0.324515	chr2	112124380			NA	NA
cg16597079	2.16158e-15	-0.00559116	0.702611	chr6	42385637	TRERF1	5'UTR	NA	NA
cg05249026	2.24333e-15	-0.00639259	0.544435	chr16	11031524	DEXI	3'UTR	NA	NA
cg21132686	2.24788e-15	-0.00638904	0.890231	chr20	22795774			NA	NA
cg16705546	2.27789e-15	-0.0070707	0.510564	chr16	85936666	IRF8	Body	NA	NA
cg26841068	2.45525e-15	0.00417949	0.573875	chr1	203456691	PRELP;PRELP	3'UTR;3'UTR	NA	NA
cg18038207	2.47627e-15	-0.00367156	0.524038	chr12	80581062			NA	NA
cg16890093	2.52394e-15	-0.00468785	0.120732	chr6	32813084	PSMB8;PSMB8;TAP1	TSS1500;TSS1500;3'UTR	NA	NA
cg03640051	2.56535e-15	-0.00735054	0.0731561	chr4	42657689	ATP8A1;ATP8A1	Body;Body	NA	NA
cg24420089	2.58317e-15	-0.00757929	0.915912	chr11	457304	PTDSS2	Body	NA	NA
cg18998543	2.72545e-15	-0.00481566	0.433196	chr7	2769865	GNA12	3'UTR	NA	NA
cg00066663	2.9075e-15	-0.00328994	0.699809	chr17	7792674	CHD3;CHD3;CHD3	Body;Body;Body	NA	NA
cg12155547	2.9091e-15	-0.0069355	0.933654	chr11	65194965			NA	NA
cg22400703	3.12234e-15	0.00822553	0.935907	chr2	68545995	CNRIP1;CNRIP1	Body;Body	NA	NA
cg20345915	3.14473e-15	0.00736595	0.826818	chr10	121296042	RGS10;RGS10;RGS10	5'UTR;Body;1stExon	NA	NA
cg10153349	3.21727e-15	0.00700051	0.584697	chr11	13983893	SPON1	TSS200	NA	NA
cg27210390	3.32162e-15	0.00726715	0.104112	chr17	52978583	TOM1L1	Body	NA	NA
cg20052079	3.40703e-15	-0.00824538	0.102752	chr6	15504923	JARID2	Body	NA	NA
cg09479286	3.74914e-15	-0.00842223	0.285678	chr2	169659182	NOSTRIN;NOSTRIN;NOSTRIN;NOSTRIN;NOSTRIN	5'UTR;1stExon;1stExon;1stExon;Body	NA	NA
cg02747950	3.83353e-15	-0.00606334	0.532739	chr15	63526883	RAB8B	Body	-5.79	1e-08
cg09907542	3.88953e-15	-0.00777026	0.817415	chr4	7033761	TBC1D14;TBC1D14;TBC1D14	3'UTR;3'UTR;3'UTR	NA	NA
cg04451175	3.96163e-15	0.0072862	0.583742	chr8	16860088	FGF20	TSS1500	NA	NA
cg06043908	4.29647e-15	-0.00533096	0.274942	chr8	49467831			NA	NA
cg03492827	4.3603e-15	0.00537074	0.435324	chr7	72838601			NA	NA
cg00785980	4.44466e-15	0.00501456	0.318884	chr13	32984237	N4BP2L1;N4BP2L1	Body;Body	NA	NA
cg15478483	4.77628e-15	0.0091686	0.615273	chr6	111936529			NA	NA
cg16107105	5.00888e-15	0.00633309	0.414523	chr7	150646704	KCNH2;KCNH2;KCNH2	Body;Body;3'UTR	NA	NA
cg12774946	5.08447e-15	0.00657011	0.781782	chr6	129966801	ARHGAP18	Body	NA	NA
cg12810800	5.11949e-15	0.00686665	0.81985	chr2	159788345			NA	NA
cg07770777	5.15565e-15	-0.010709	0.408248	chr13	113528375	ATP11A;ATP11A	Body;Body	NA	NA
cg16277071	5.48736e-15	0.00571693	0.384195	chr17	75537317			NA	NA
cg14553895	5.63954e-15	-0.00746764	0.738068	chr3	178899170	PIK3CA	5'UTR	NA	NA
cg00257775	5.67038e-15	-0.00914089	0.235728	chr6	37904681	ZFAND3	Body	NA	NA
cg15123573	5.77603e-15	0.0070305	0.242776	chr5	176827082			NA	NA
cg13561409	6.47318e-15	-0.0059746	0.0955162	chr19	3677220	PIP5K1C	Body	NA	NA
cg25020550	6.65886e-15	-0.00656447	0.480529	chr8	134028958	TG	Body	NA	NA
cg10505630	7.07101e-15	-0.00504905	0.917424	chr5	151051214	SPARC	Body	NA	NA
cg20798249	7.25012e-15	0.00704262	0.981557	chr13	49793107	MLNR	TSS1500	NA	NA
cg22730004	7.68344e-15	-0.00701691	0.910345	chr1	158656718	SPTA1	TSS1500	NA	NA
cg14434062	8.22942e-15	-0.00556242	0.944341	chr15	70767419			-5.8	1e-08
cg19607845	8.49026e-15	-0.00687644	0.690864	chr6	52934457	FBXO9;FBXO9;FBXO9	Body;5'UTR;TSS1500	NA	NA
cg20441135	8.92514e-15	0.00701782	0.986712	chr10	93999132	CPEB3	Body	NA	NA
cg17796323	9.12228e-15	-0.00991479	0.916309	chr5	177547973	N4BP3	Body	NA	NA
cg02345399	9.24293e-15	-0.00523308	0.834492	chr11	65195039			NA	NA
cg23304605	9.54884e-15	-0.00655723	0.60364	chr14	91866373	CCDC88C	Body	NA	NA
cg14830371	9.76285e-15	-0.00783544	0.616277	chr8	25991602			NA	NA
cg09718582	1.02759e-14	0.00897261	0.126831	chr2	240751196			NA	NA
cg13464573	1.0796e-14	-0.00547656	0.146263	chr2	7172097	RNF144A	Body	NA	NA
cg22797644	1.16186e-14	0.00435518	0.0270593	chr6	34206491	HMGA1;HMGA1;HMGA1;HMGA1;HMGA1;HMGA1	5'UTR;5'UTR;5'UTR;5'UTR;5'UTR;TSS200	NA	NA
cg12001120	1.20718e-14	0.00848625	0.734651	chr2	219751342	WNT10A	Body	NA	NA
cg12646820	1.24038e-14	0.00712129	0.573043	chr6	13924406	RNF182;RNF182;RNF182;RNF182	TSS1500;TSS1500;TSS1500;TSS1500	NA	NA
cg24087613	1.25799e-14	0.00469362	0.991557	chr4	129112470	LARP1B	Body	NA	NA
cg05135156	1.36815e-14	0.00582854	0.360366	chr1	184355420	C1orf21	TSS1500	NA	NA
cg08813888	1.37412e-14	-0.00685102	0.83954	chr2	662396			-5.64	2.5e-08
cg09007354	1.42499e-14	0.00583221	0.927873	chr1	54100163	GLIS1	5'UTR	NA	NA
cg05433642	1.43636e-14	-0.00715507	0.56082	chr13	97873992	MBNL2;MBNL2	TSS1500;TSS1500	NA	NA
cg14620184	1.5508e-14	0.00498268	0.243507	chr2	29941470	ALK	Body	NA	NA
cg01578442	1.57958e-14	0.00692609	0.957134	chr5	124223911			NA	NA
cg06275642	1.62588e-14	0.00526496	0.988021	chr2	68546038	CNRIP1;CNRIP1	Body;Body	NA	NA
cg05900530	1.67714e-14	-0.00811938	0.704196	chr3	167371353	WDR49	TSS200	NA	NA
cg18778196	1.68e-14	-0.00609209	0.512835	chr15	67054877	SMAD6;SMAD6;SMAD6	Body;Body;Body	NA	NA
cg06495038	1.7275e-14	-0.006308	0.361199	chr5	76247647	CRHBP	TSS1500	NA	NA
cg25841625	1.77613e-14	-0.00629072	0.604323	chr4	77119588	SCARB2	Body	NA	NA
cg25618424	1.81287e-14	-0.00826295	0.775214	chr1	2989307	PRDM16;PRDM16	Body;Body	NA	NA
cg15954235	1.82297e-14	-0.00537922	0.958461	chr6	34514887	SPDEF	5'UTR	NA	NA
cg25157472	1.8505e-14	-0.00630113	0.84081	chr3	12996362	IQSEC1;IQSEC1	Body;Body	NA	NA
cg08412913	1.95894e-14	-0.00709127	0.767205	chr16	85429522			-5.74	1.4e-08
cg10481072	1.96778e-14	-0.00625611	0.708992	chr7	92459517	CDK6;CDK6	Body;Body	NA	NA
cg26383193	2.03079e-14	-0.0063914	0.627902	chr4	47488375	ATP10D	5'UTR	NA	NA
cg00782811	2.04484e-14	0.00520357	0.609937	chr6	46293734	RCAN2	TSS1500	NA	NA
cg24455405	2.19998e-14	0.00219098	0.779319	chr6	33172353	HSD17B8	TSS200	NA	NA
cg19190699	2.2559e-14	0.00565493	0.974536	chr15	101514156	LRRK1	Body	NA	NA
cg24378227	2.28518e-14	0.00541767	0.436737	chr6	1396771			NA	NA
cg16936289	2.29921e-14	-0.00651806	0.531506	chr17	29148918	CRLF3	Body	NA	NA
cg18959309	2.35142e-14	0.00489162	0.685796	chr1	220864248	C1orf115	Body	NA	NA
cg23230929	2.39861e-14	0.00526631	0.785189	chr2	87883547			NA	NA
cg21408360	2.46866e-14	0.00566303	0.182319	chr1	203493477			NA	NA
cg09333580	2.58159e-14	-0.00491794	0.832593	chr20	31606541	BPIL1	Body	NA	NA
cg25009965	2.59877e-14	-0.00684331	0.653492	chr11	114031120	ZBTB16;ZBTB16	Body;Body	-5.4	8.9e-08
cg04160501	2.66371e-14	-0.00631756	0.13416	chr7	4723667	FOXK1	Body	NA	NA
cg27262054	2.66445e-14	0.0065871	0.385932	chr16	73067525	ZFHX3;ZFHX3	5'UTR;5'UTR	NA	NA
cg00546897	2.7833e-14	-0.00562222	0.776902	chr21	45232232	LOC284837	Body	NA	NA
cg23436584	3.04295e-14	0.00531712	0.0259555	chr12	98833359			NA	NA
cg16089416	3.13388e-14	0.00172239	0.344797	chr5	126114228	LMNB1	Body	NA	NA
cg06454226	3.15344e-14	0.00572434	0.0289623	chr18	2572965	NDC80;METTL4	5'UTR;TSS1500	NA	NA
cg17969560	3.24913e-14	-0.00566657	0.123762	chr11	65324768	LTBP3;LTBP3;LTBP3	Body;5'UTR;Body	NA	NA
cg07298299	3.27281e-14	0.00689547	0.304391	chr11	45943237	GYLTL1B;GYLTL1B	1stExon;5'UTR	NA	NA
cg17680767	3.31879e-14	-0.00545116	0.879563	chr5	73623208			NA	NA
cg05298628	3.41207e-14	-0.00498166	0.280893	chr12	123379569	VPS37B	Body	-5.79	1e-08
cg08435674	3.49554e-14	0.0075641	0.710304	chr6	36308494			NA	NA
cg01287088	4.03431e-14	0.00918639	0.857842	chr5	176827392	PFN3	1stExon	NA	NA
cg14556762	4.07704e-14	-0.00741206	0.343575	chr1	170532470			NA	NA
cg03281561	4.26335e-14	0.00985172	0.917838	chr3	159942181	LOC401097	TSS1500	NA	NA
cg15489693	4.3048e-14	0.00560154	0.344752	chr4	10498037	CLNK	Body	NA	NA
cg08503681	4.3337e-14	0.00622736	0.58395	chr5	145895884	GPR151	TSS1500	NA	NA
cg13034073	4.38247e-14	-0.00703877	0.127632	chr7	2769681	GNA12	3'UTR	NA	NA
cg01111041	4.72652e-14	0.00833581	0.801442	chr6	32121055	PPT2;PRRT1;PPT2	TSS1500;TSS1500;TSS1500	NA	NA
cg01798157	4.74288e-14	-0.00789999	0.86305	chr1	203276595	BTG2	3'UTR	NA	NA
cg09152259	4.81515e-14	-0.00594717	0.749233	chr2	128156114			NA	NA
cg10501360	5.04313e-14	-0.00499374	0.0714862	chr10	49671665	ARHGAP22	Body	-5.46	6.7e-08
cg17980119	5.15282e-14	0.006358	0.937337	chr2	219472607	PLCD4	TSS200	NA	NA
cg21574271	5.18566e-14	-0.00678415	0.269119	chr4	96051461	BMPR1B	Body	NA	NA
cg14427590	5.35035e-14	0.00471567	0.855924	chr17	60695089			5.48	5.8e-08
cg06540458	5.61788e-14	0.00666417	0.310062	chr1	226951747			NA	NA
cg08937102	5.6869e-14	-0.00474977	0.783546	chr1	1690389	NADK	Body	NA	NA
cg18745416	6.00856e-14	-0.00711998	0.342684	chr6	152011399	ESR1	TSS1500	NA	NA
cg13347910	6.61534e-14	0.0120911	0.562725	chr6	10555853	GCNT2;GCNT2	TSS200;Body	NA	NA
cg00575529	6.80962e-14	0.00142356	0.328348	chr6	30685080	MDC1;MDC1	1stExon;5'UTR	NA	NA
cg25219643	7.02401e-14	0.00561928	0.191698	chr11	86106473	CCDC81;CCDC81	Body;Body	NA	NA
cg25344672	7.13282e-14	0.00585868	0.383813	chr9	135285207	C9orf171	TSS1500	NA	NA
cg07276534	7.27334e-14	0.00360092	0.778542	chr3	193534580			NA	NA
cg20103692	7.52719e-14	-0.00598905	0.334815	chr6	29454672	MAS1L	1stExon	NA	NA
cg11512608	7.54747e-14	0.00674102	0.736329	chr11	73357276	PLEKHB1;PLEKHB1;PLEKHB1;PLEKHB1;PLEKHB1;PLEKHB1	5'UTR;1stExon;5'UTR;TSS1500;TSS1500;1stExon	NA	NA
cg17610169	7.62027e-14	0.00597118	0.657452	chr11	10750973			NA	NA
cg22608507	7.88536e-14	-0.00614838	0.00862349	chr12	123379308	VPS37B	Body	NA	NA
cg00512459	7.91417e-14	0.0048083	0.547258	chr15	88266173			NA	NA
cg24340029	8.12823e-14	0.00166488	0.757794	chr9	136039283	GBGT1;GBGT1	5'UTR;1stExon	NA	NA
cg05287480	8.49419e-14	0.00634893	0.956177	chr7	27176127			NA	NA
cg25112877	8.70519e-14	0.00448981	0.520867	chr2	159702723			NA	NA
cg19035792	9.06736e-14	-0.00372059	0.843351	chr22	38382245			NA	NA
cg08041350	9.10795e-14	0.00731485	0.0306186	chr17	25819112	KSR1	5'UTR	NA	NA
cg18503234	9.17144e-14	-0.00582877	0.958149	chr11	68847839	TPCN2	Body	NA	NA
cg08026631	9.40166e-14	0.00142453	0.898353	chr1	151372335	PSMB4	Body	NA	NA
cg04749507	9.53128e-14	0.00596447	0.751318	chr6	32120203	PPT2;PRRT1;PPT2	TSS1500;TSS1500;TSS1500	NA	NA
cg26728709	1.03375e-13	-0.0073977	0.0773266	chr4	114823338	ARSJ	3'UTR	NA	NA
cg25137841	1.03973e-13	0.00537622	0.264678	chr22	31536585	PLA2G3	TSS200	NA	NA
cg03390636	1.05422e-13	-0.00823966	0.682463	chr15	80843452	ARNT2	Body	NA	NA
cg14419435	1.06277e-13	-0.00579038	0.242926	chr17	48906982			NA	NA
cg05526498	1.06447e-13	-0.00527493	0.441132	chr17	49012893			NA	NA
cg27508620	1.07583e-13	0.00874784	0.22917	chr7	21209725			NA	NA
cg00781658	1.11245e-13	-0.00630261	0.344462	chr19	41805850	HNRNPUL1;HNRNPUL1	Body;Body	NA	NA
cg03747456	1.13951e-13	-0.00654946	0.659717	chr12	52586127	KRT80;KRT80	TSS1500;TSS1500	NA	NA
cg08326019	1.16989e-13	0.0134583	0.945152	chr19	11472261	LPPR2;LPPR2	Body;Body	NA	NA
cg20752878	1.1723e-13	0.00766768	0.217928	chr17	7080538	ASGR1	Body	NA	NA
cg12192749	1.19026e-13	-0.00540406	0.107561	chr7	17029795			NA	NA
cg10714509	1.20199e-13	-0.00866815	0.714295	chr1	234680511			NA	NA
cg13622265	1.24595e-13	0.00963552	0.876369	chr9	124584474	TTLL11	3'UTR	NA	NA
cg26262157	1.2588e-13	-0.00686633	0.640668	chr10	6214079	PFKFB3	Body	NA	NA
cg26396492	1.2706e-13	0.00598734	0.0980606	chr20	19915762	RIN2	Body	NA	NA
cg09022230	1.28258e-13	-0.00629633	0.864547	chr7	5457225	TNRC18	Body	NA	NA
cg24916358	1.30692e-13	-0.00680002	0.584818	chr10	126315761	FAM53B	Body	NA	NA
cg04920452	1.30888e-13	0.00618105	0.056705	chr17	76227681	LOC283999	Body	NA	NA
cg03249011	1.31159e-13	-0.00684766	0.909129	chr11	65195995			NA	NA
cg08457421	1.33624e-13	0.00558267	0.680061	chr22	31536431	PLA2G3;PLA2G3	5'UTR;1stExon	NA	NA
cg23007087	1.34273e-13	-0.00612584	0.236402	chr15	90380258	AP3S2;AP3S2	Body;Body	NA	NA
cg10250177	1.34345e-13	-0.00595707	0.637437	chr1	32739752	LCK;LCK;LCK	5'UTR;1stExon;5'UTR	NA	NA
cg10489463	1.364e-13	-0.00697565	0.660563	chr2	33546572	LTBP1;LTBP1;LTBP1;LTBP1;LTBP1	Body;Body;Body;Body;Body	NA	NA
cg23587050	1.40454e-13	0.0015791	0.542302	chr11	110301128	FDX1	Body	NA	NA
cg05626664	1.4076e-13	0.00575715	0.601556	chr1	208394231	PLXNA2	5'UTR	NA	NA
cg08070725	1.44146e-13	0.00573092	0.895913	chr13	39991764	LHFP	Body	NA	NA
cg02392124	1.48215e-13	-0.00700624	0.974909	chr10	28876249	WAC;WAC;WAC	Body;Body;Body	NA	NA
cg02439077	1.50093e-13	0.00595559	0.358177	chr10	72202215	NODAL	TSS1500	NA	NA
cg15527674	1.50839e-13	0.00600162	0.801493	chr11	61248474	C11orf66;C11orf66	TSS200;TSS200	NA	NA
cg04997045	1.53368e-13	-0.00893221	0.885101	chr4	1240068	CTBP1;CTBP1	Body;5'UTR	NA	NA
cg12813802	1.55546e-13	-0.00349712	0.308357	chr8	97316933	PTDSS1	Body	NA	NA
cg12024104	1.56953e-13	-0.00609608	0.573883	chr12	6662581	IFFO1;IFFO1	Body;Body	NA	NA
cg09761503	1.70257e-13	0.00405488	0.953657	chr7	142659349	KEL;KEL	1stExon;5'UTR	NA	NA
cg01787084	1.70821e-13	-0.00912588	0.675327	chr16	87371097	FBXO31;FBXO31	Body;Body	-5.94	4.3e-09
cg13733403	1.72455e-13	0.00492149	0.971264	chr19	6528291			NA	NA
cg06652329	1.75962e-13	-0.00564543	0.434011	chr12	102874566	IGF1;IGF1;IGF1	TSS200;TSS200;TSS200	NA	NA
cg07047815	1.77419e-13	-0.00468509	0.0701546	chr11	1909656	LSP1;LSP1;LSP1;LSP1	3'UTR;3'UTR;3'UTR;3'UTR	NA	NA
cg18520238	1.77691e-13	-0.0106785	0.610697	chr11	36422557	PRR5L;PRR5L;PRR5L;PRR5L;PRR5L	5'UTR;5'UTR;1stExon;5'UTR;Body	-6.18	1.1e-09
cg17501395	1.79018e-13	-0.00588117	0.271697	chr6	149806331	ZC3H12D	TSS200	NA	NA
cg13102294	1.81382e-13	0.00604728	0.956546	chr6	32121393	PPT2;PPT2;PPT2	TSS1500;1stExon;5'UTR	NA	NA
cg02525826	1.81586e-13	0.00490976	0.289965	chr4	55091178			NA	NA
cg21124375	1.89883e-13	0.00548817	0.541525	chr2	232765392			NA	NA
cg20924136	1.91439e-13	-0.00490448	0.628117	chr2	230808359	FBXO36	Body	NA	NA
cg10695490	1.9253e-13	0.00573284	0.428491	chr19	49659299	HRC	TSS1500	NA	NA
cg07063912	1.9658e-13	-0.00631233	0.493936	chr2	238598832	LRRFIP1	Body	NA	NA
cg00351443	2.00805e-13	0.00554145	0.216242	chr10	105252720	NEURL	TSS1500	NA	NA
cg10689689	2.02341e-13	-0.00468282	0.213662	chr11	63677197	MARK2;MARK2;MARK2;MARK2;MARK2	3'UTR;3'UTR;3'UTR;3'UTR;3'UTR	NA	NA
cg09229492	2.05685e-13	-0.00534636	0.760147	chr16	50626578	NKD1	Body	-5.43	7.7e-08
cg13078421	2.1491e-13	-0.00764928	0.0416986	chr19	2624622	GNG7	5'UTR	NA	NA
cg15442737	2.1515e-13	-0.00871345	0.0823348	chr8	141370229	TRAPPC9;TRAPPC9	Body;Body	NA	NA
cg27315157	2.17709e-13	-0.00484645	0.887681	chr1	79086197	IFI44L;IFI44L	5'UTR;1stExon	NA	NA
cg11540997	2.17893e-13	0.00368341	0.46132	chr15	45407818	DUOX2;DUOXA2	TSS1500;Body	NA	NA
cg08670658	2.2205e-13	-0.00631131	0.647799	chr11	67052992	ADRBK1	3'UTR	NA	NA
cg18728264	2.24352e-13	0.00560892	0.189046	chr11	118766491	CXCR5;CXCR5;CXCR5	1stExon;3'UTR;3'UTR	NA	NA
cg18214661	2.25326e-13	-0.00697913	0.222001	chr8	17471997	PDGFRL	Body	NA	NA
cg03654783	2.27856e-13	0.00486418	0.312162	chr1	156634034			NA	NA
cg08899667	2.29272e-13	-0.00463123	0.226618	chr6	31761055	VARS	Body	NA	NA
cg14292619	2.30913e-13	-0.00823764	0.721324	chr12	75784617	GLIPR1L2	TSS1500	NA	NA
cg08531140	2.33197e-13	0.00584122	0.393061	chr11	67143062	LOC100130987;CLCF1	Body;TSS1500	NA	NA
cg17571207	2.37944e-13	0.00620261	0.988688	chr22	33257641	SYN3;SYN3;TIMP3;SYN3	Body;Body;3'UTR;Body	NA	NA
cg00153101	2.38635e-13	-0.00644604	0.123653	chr1	2431753	PLCH2	Body	NA	NA
cg12585943	2.44286e-13	0.00522718	0.434645	chr6	32121368	PPT2;PPT2;PPT2	TSS1500;1stExon;5'UTR	NA	NA
cg15028899	2.46376e-13	0.00529737	0.494814	chr11	120275443	ARHGEF12	Body	NA	NA
cg13428066	2.59236e-13	-0.00573756	0.941927	chr11	2677768	KCNQ1;KCNQ1OT1;KCNQ1	Body;Body;Body	NA	NA
cg18436214	2.62468e-13	-0.0074091	0.942416	chr10	77268489			NA	NA
cg07069759	2.63157e-13	0.0070832	0.882753	chr10	47134171	LOC728643	TSS1500	NA	NA
cg17489312	2.63622e-13	-0.00698531	0.209254	chr1	9376039	SPSB1	5'UTR	NA	NA
cg08110488	2.65106e-13	-0.00975192	0.992625	chr1	82136224			NA	NA
cg20306574	2.75684e-13	-0.00606364	0.434114	chr14	24601499	FITM1	Body	NA	NA
cg24924577	2.78376e-13	-0.00618496	0.450159	chr15	90735148	SEMA4B	5'UTR	NA	NA
cg12497007	2.83773e-13	0.00153788	0.418819	chr16	29828301	C16orf53	1stExon	NA	NA
cg01832549	2.88514e-13	-0.00682393	0.828497	chr1	19774989	CAPZB	Body	NA	NA
cg24401487	3.04961e-13	-0.00649593	0.517001	chr1	230416880	GALNT2	3'UTR	NA	NA
cg11426726	3.11671e-13	-0.00743967	0.770114	chr15	63845726	USP3	Body	NA	NA
cg03904291	3.11837e-13	0.00552832	0.278537	chr11	119019361	ABCG4;ABCG4	TSS1500;TSS1500	NA	NA
cg02888917	3.14791e-13	0.00191258	0.655341	chr6	32940425	BRD2;BRD2	5'UTR;5'UTR	NA	NA
cg27239243	3.20048e-13	-0.00445076	0.0142241	chr2	101945867			NA	NA
cg26433582	3.23992e-13	-0.00756525	0.82495	chr11	68848232	TPCN2	Body	NA	NA
cg10949576	3.45634e-13	0.00551318	0.740355	chr11	61248556	C11orf66;C11orf66	TSS200;TSS200	NA	NA
cg23238677	3.53689e-13	0.00573736	0.679182	chr2	170157334	LRP2	Body	NA	NA
cg24257309	3.61715e-13	-0.00683784	0.253073	chr20	3065423	AVP	TSS200	-5.61	2.9e-08
cg14353958	3.63402e-13	0.00538222	0.0585446	chr9	71947038	FAM189A2;FAM189A2	5'UTR;5'UTR	NA	NA
cg13309628	3.72719e-13	0.00166298	0.806922	chr20	3801056	C20orf29	TSS200	NA	NA
cg23414595	3.88892e-13	-0.00627468	0.27521	chr22	30129607	ZMAT5;ZMAT5	Body;Body	-5.57	3.5e-08
cg12214451	3.90751e-13	0.00487196	0.438895	chr4	114900175	ARSJ;ARSJ	1stExon;5'UTR	NA	NA
cg27381979	3.93809e-13	0.00465443	0.169973	chr3	13537787	HDAC11;HDAC11	Body;Body	NA	NA
cg04845871	4.02632e-13	-0.00501382	0.734759	chr1	207996319			NA	NA
cg00834923	4.16391e-13	-0.0061561	0.506694	chr16	85393998			NA	NA
cg10824354	4.2242e-13	0.00438588	0.0875484	chr17	47049956			NA	NA
cg23208717	4.22588e-13	0.00617447	0.62392	chr7	150082688	ZNF775	5'UTR	NA	NA
cg11236515	4.34274e-13	-0.0042657	0.807862	chr2	74213762			NA	NA
cg12170787	4.64698e-13	-0.00565115	0.822266	chr19	1130965	SBNO2;SBNO2	Body;Body	NA	NA
cg19442415	4.70006e-13	-0.00550369	0.808314	chr11	116567334			NA	NA
cg12622182	4.70378e-13	0.0041552	0.899753	chr1	38513641	POU3F1	TSS1500	NA	NA
cg04802801	4.73749e-13	0.00147001	0.640056	chr6	30034711	PPP1R11	TSS1500	NA	NA
cg25567674	4.78027e-13	0.00435832	0.145169	chr3	123751655			NA	NA
cg12577010	4.97254e-13	-0.00592365	0.353577	chr7	134832544	TMEM140	TSS1500	NA	NA
cg13027183	5.051e-13	-0.00780534	0.466938	chr6	15504872	JARID2	Body	NA	NA
cg23061725	5.05386e-13	-0.00849824	0.358246	chr2	202126379	CASP8;CASP8;CASP8;CASP8;CASP8;CASP8	5'UTR;Body;5'UTR;5'UTR;5'UTR;5'UTR	NA	NA
cg01187562	5.14584e-13	0.00153447	0.353863	chr11	76382128	LRRC32;LRRC32	TSS1500;TSS1500	NA	NA
cg02154252	5.32249e-13	0.00455736	0.422608	chr1	79472532	ELTD1	TSS200	NA	NA
cg19401033	5.36801e-13	0.00783855	0.76961	chr3	107148372			NA	NA
cg03663556	5.42881e-13	-0.00562098	0.393896	chr7	50900556			NA	NA
cg04499029	5.51914e-13	0.00174872	0.901208	chr19	13210356	LYL1	Body	NA	NA
cg06108383	5.54911e-13	0.0084218	0.882663	chr6	32120899	PPT2;PRRT1;PPT2	TSS1500;TSS1500;TSS1500	NA	NA
cg26096752	5.55282e-13	-0.0088202	0.497242	chr5	66530611			NA	NA
cg23674602	5.57748e-13	-0.00415087	0.568987	chr10	74023752			NA	NA
cg09940188	5.65464e-13	-0.0103084	0.274318	chr17	1686671	SMYD4	Body	NA	NA
cg04505252	5.74889e-13	0.00511706	0.0186755	chr6	15244745			NA	NA
cg08783253	5.75226e-13	-0.0059007	0.809848	chr17	40996565	AOC2;AOC2	TSS200;TSS200	-5.43	7.6e-08
cg27480377	5.9816e-13	0.00149972	0.837022	chr3	197518634	LRCH3	Body	NA	NA
cg13932501	6.22961e-13	-0.00582337	0.0679108	chr9	94060853	AUH	Body	NA	NA
cg17826530	6.27007e-13	0.0079134	0.608808	chr1	59280290			NA	NA
cg15161667	6.38564e-13	0.00538924	0.347654	chr11	46940613	LRP4	TSS1500	NA	NA
cg21800906	6.54468e-13	0.00174445	0.872149	chr11	32914818	QSER1;QSER1	5'UTR;1stExon	NA	NA
cg00587472	7.0143e-13	-0.00748427	0.409307	chr2	6952860			NA	NA
cg01538731	7.28227e-13	-0.0121383	0.225076	chr16	87757018	KLHDC4	Body	NA	NA
cg19925872	7.50379e-13	0.00675316	0.409957	chr15	90543392	ZNF710	TSS1500	NA	NA
cg09560590	7.6812e-13	-0.00473151	0.691268	chr5	143191663	HMHB1	TSS200	NA	NA
cg18870258	8.08623e-13	-0.00548517	0.368984	chr20	9460935	PLCB4;PLCB4	3'UTR;3'UTR	NA	NA
cg13784312	8.0966e-13	-0.00682986	0.835112	chr9	134609065	RAPGEF1	Body	NA	NA
cg05413199	8.20162e-13	0.00798401	0.510788	chr16	67430454	ZDHHC1	Body	NA	NA
cg23511285	8.20342e-13	-0.00542999	0.562931	chr19	48205761	GLTSCR1	3'UTR	NA	NA
cg01289541	8.30212e-13	0.00482556	0.392004	chr3	170282058	SLC7A14	5'UTR	NA	NA
cg07243147	8.31196e-13	-0.00540912	0.383133	chr7	150744274	ACCN3;ACCN3;ABCB8;ACCN3	TSS1500;TSS1500;3'UTR;TSS1500	NA	NA
cg10406027	8.38333e-13	-0.00508237	0.770322	chr16	11876912	ZC3H7A	TSS1500	NA	NA
cg12550731	8.48073e-13	0.00620434	0.50309	chr1	184355219	C1orf21	TSS1500	NA	NA
cg21788755	8.75944e-13	-0.00423725	0.873078	chr3	48508391	TREX1;TREX1	Body;1stExon	NA	NA
cg06029700	9.09723e-13	-0.00930213	0.107287	chr12	6473311	SCNN1A;SCNN1A;SCNN1A	Body;Body;Body	NA	NA
cg18865207	9.692e-13	0.00416893	0.0502666	chr1	160765919	LY9;LY9	TSS200;TSS200	NA	NA
cg02186444	9.75103e-13	-0.00526856	0.811676	chr17	73120977	ARMC7	Body	NA	NA
cg16306870	9.91467e-13	-0.0102364	0.172778	chr3	194868790	C3orf21	Body	NA	NA
cg15920975	1.01404e-12	-0.00613956	0.163198	chr11	65194933			NA	NA
cg05339037	1.02474e-12	-0.00418085	0.225185	chr19	13951168			NA	NA
cg09626867	1.02856e-12	-0.00770274	0.309917	chr3	45053351	EXOSC7	Body	NA	NA
cg05830220	1.03369e-12	-0.00967147	0.10227	chr16	87757033	KLHDC4	Body	NA	NA
cg04225775	1.03791e-12	-0.00530656	0.220568	chr5	143191771	HMHB1;HMHB1	1stExon;5'UTR	NA	NA
cg14656043	1.0501e-12	-0.00678941	0.0615915	chr10	35419996	CREM;CREM;CREM;CREM;CREM;CREM	5'UTR;5'UTR;5'UTR;5'UTR;5'UTR;5'UTR	-6.32	4.5e-10
cg25414605	1.06468e-12	-0.00462145	0.718396	chr11	67182672	ATPGD1;ATPGD1	TSS1500;TSS1500	NA	NA
cg13638867	1.08114e-12	0.00649838	0.15987	chr11	2241568			NA	NA
cg07732037	1.1175e-12	-0.00731224	0.806818	chr12	123707827	MPHOSPH9	TSS1500	NA	NA
cg07106169	1.12663e-12	-0.00492704	0.224056	chr2	95740362			NA	NA
cg11132223	1.13521e-12	-0.00626128	0.193905	chr1	169696560	SELE	Body	NA	NA
cg03485674	1.15131e-12	-0.00451004	0.925185	chr16	50347895	ADCY7	Body	NA	NA
cg24776736	1.15863e-12	-0.00567426	0.577188	chr12	66356357	HMGA2	Body	NA	NA
cg09255851	1.20202e-12	-0.00728092	0.29291	chr16	24555610	RBBP6;RBBP6;RBBP6	Body;Body;Body	NA	NA
cg12194745	1.20916e-12	0.00686956	0.956266	chr17	79423649	BAHCC1	Body	NA	NA
cg10428805	1.22894e-12	0.00149054	0.471038	chr19	12035959	ZNF700;ZNF700	5'UTR;1stExon	NA	NA
cg24166100	1.25e-12	0.0051075	0.176243	chr2	218886643			NA	NA
cg09722609	1.25379e-12	-0.00485474	0.168688	chr5	149887422	NDST1	TSS1500	NA	NA
cg21626540	1.26316e-12	0.0055851	0.146518	chr2	10720198	NOL10	Body	NA	NA
cg01847614	1.26492e-12	0.00137193	0.123892	chr6	43027266	KLC4;KLC4;KLC4;MRPL2;KLC4	TSS1500;TSS200;TSS200;TSS200;TSS1500	NA	NA
cg23754392	1.27185e-12	0.00344784	0.435443	chr10	22611454	BMI1	5'UTR	NA	NA
cg08872703	1.27844e-12	0.00479381	0.0179755	chr1	109849854	MYBPHL	TSS200	NA	NA
cg11591485	1.28394e-12	0.00505658	0.425322	chr3	124839640	SLC12A8	Body	NA	NA
cg27640064	1.28957e-12	-0.00479874	0.700182	chr7	4752983	FOXK1	Body	NA	NA
cg12741184	1.32389e-12	0.00685796	0.894308	chr17	1397079	MYO1C	TSS1500	NA	NA
cg13675859	1.33826e-12	-0.00613194	0.974678	chr6	47002973	GPR110;GPR110	5'UTR;5'UTR	-7.72	3.9e-14
cg23359665	1.34134e-12	0.0125154	0.837665	chr6	32120907	PPT2;PRRT1;PPT2	TSS1500;TSS1500;TSS1500	NA	NA
cg17714703	1.36862e-12	-0.00512815	0.329841	chr19	4912221	UHRF1;UHRF1	Body;Body	NA	NA
cg04052934	1.38726e-12	0.0049983	0.374512	chr6	147179017			NA	NA
cg23580000	1.42708e-12	-0.00725203	0.761125	chr16	50322156	ADCY7	1stExon	NA	NA
cg00499707	1.45927e-12	0.00459618	0.630521	chr20	34679665			6.05	2.3e-09
cg17692230	1.46208e-12	-0.00709865	0.550938	chr4	103360578			NA	NA
cg11399195	1.49255e-12	0.00575454	0.109937	chr1	10364025	KIF1B;KIF1B	Body;Body	NA	NA
cg00424169	1.49923e-12	0.00789803	0.749069	chr13	31506837	C13orf26;C13orf26	1stExon;5'UTR	NA	NA
cg09678939	1.50669e-12	-0.00671438	0.0207709	chr6	149806081	ZC3H12D;ZC3H12D	5'UTR;1stExon	NA	NA
cg10016208	1.51927e-12	0.00160829	0.591389	chr19	19143972	SFRS14;ARMC6;SFRS14	5'UTR;TSS1500;5'UTR	NA	NA
cg15053190	1.52712e-12	0.00443236	0.938034	chr22	18893313	DGCR6	TSS1500	NA	NA
cg22374525	1.54506e-12	0.00496801	0.749901	chr1	116370764			NA	NA
cg05404233	1.5673e-12	0.00592937	0.535977	chr16	11490439			NA	NA
cg00721016	1.56942e-12	0.00448355	0.318809	chr11	76745087	B3GNT6	TSS1500	NA	NA
cg03602233	1.60102e-12	-0.00488237	0.213381	chr16	75144040	ZNRF1	3'UTR	NA	NA
cg04384912	1.6233e-12	-0.00492023	0.035748	chr15	80325923			NA	NA
cg08994060	1.69317e-12	-0.00672715	0.797716	chr10	6214026	PFKFB3	Body	NA	NA
cg16874095	1.71024e-12	0.00534451	0.726456	chr14	34529121			NA	NA
cg22422264	1.71026e-12	-0.00752502	0.419471	chr15	50792856	USP50;USP8;USP8;USP8	3'UTR;3'UTR;3'UTR;3'UTR	NA	NA
cg23890469	1.72775e-12	0.00425841	0.252084	chr10	88715317	MMRN2	Body	NA	NA
cg23100720	1.75299e-12	0.00653868	0.166365	chr6	155770386	NOX3	Body	NA	NA
cg06272045	1.75675e-12	0.00867171	0.976708	chr15	99979059			NA	NA
cg20503117	1.77084e-12	0.00153384	0.578518	chr3	5164013	ARL8B;ARL8B	1stExon;5'UTR	NA	NA
cg11067714	1.77106e-12	0.00557286	0.224788	chr5	139492230	PURA	TSS1500	NA	NA
cg27585939	1.77202e-12	-0.00802286	0.384404	chr11	108983607			NA	NA
cg01723892	1.77268e-12	-0.00520675	0.240677	chr1	233004866			NA	NA
cg20314438	1.78305e-12	0.00166266	0.338146	chr6	126661369	C6orf173;C6orf173	5'UTR;1stExon	NA	NA
cg19478223	1.79474e-12	-0.00754344	0.132903	chr4	141264602	SCOC;SCOC;SCOC;SCOC;SCOC;SCOC;SCOC	5'UTR;TSS200;5'UTR;1stExon;1stExon;TSS200;5'UTR	NA	NA
cg02573176	1.81094e-12	-0.00667663	0.869192	chr8	82607505	SLC10A5	TSS1500	NA	NA
cg00448875	1.84983e-12	-0.00440376	0.0592388	chr3	133611626	RAB6B	Body	NA	NA
cg10708898	1.88474e-12	0.00462499	0.280704	chr1	35309303			NA	NA
cg00099427	1.89378e-12	0.00642552	0.450854	chr1	159870134	CCDC19	TSS1500	NA	NA
cg19856897	1.91266e-12	-0.0041626	0.0854587	chr7	142495846			NA	NA
cg01799671	1.91702e-12	-0.0101558	0.231387	chr16	81560752	CMIP;CMIP	Body;Body	-5.52	4.6e-08
cg09143713	1.94185e-12	-0.00686391	0.933525	chr20	9141615	PLCB4;PLCB4	5'UTR;5'UTR	NA	NA
cg23513600	1.97536e-12	0.00603979	0.50357	chr3	171171401	TNIK;TNIK;TNIK;TNIK;TNIK;TNIK;TNIK;TNIK;TNIK	Body;Body;Body;Body;Body;Body;Body;Body;Body	NA	NA
cg26503877	1.98422e-12	-0.00641339	0.124244	chr11	128391429	ETS1;ETS1;ETS1	Body;Body;Body	NA	NA
cg05943996	1.98486e-12	0.00170779	0.474978	chr14	42075975	LRFN5	TSS1500	NA	NA
cg18064714	2.03026e-12	0.00220389	0.497284	chr7	20824556	SP8;SP8	Body;Body	NA	NA
cg00293940	2.04875e-12	-0.00490826	0.495589	chr12	60044871			NA	NA
cg07788865	2.09123e-12	-0.00470098	0.574687	chr10	30101042			NA	NA
cg26828842	2.09825e-12	0.00621848	0.707336	chr18	67952086			NA	NA
cg00034559	2.11865e-12	0.00544954	0.699349	chr2	39892124	TMEM178;TMEM178	TSS1500;TSS1500	NA	NA
cg24453118	2.19715e-12	-0.00829944	0.39159	chr13	47229927	LRCH1;LRCH1;LRCH1	Body;Body;Body	-5.5	5.4e-08
cg06768010	2.20145e-12	0.00475798	0.293835	chr2	74729502	LOC151534;LBX2	TSS1500;Body	NA	NA
cg00257455	2.21345e-12	-0.00427575	0.707347	chr1	65530538			NA	NA
cg05515099	2.2186e-12	-0.00670395	0.367631	chr3	69482656			NA	NA
cg01556246	2.2776e-12	0.00320697	0.429464	chr8	8204802	PRAGMIN	Body	NA	NA
cg04411893	2.27841e-12	-0.0037587	0.707489	chr3	185300709			-5.84	7.8e-09
cg19087119	2.29029e-12	0.00141567	0.648492	chr11	3400323	ZNF195;ZNF195;ZNF195;ZNF195;ZNF195;ZNF195	1stExon;5'UTR;5'UTR;5'UTR;1stExon;1stExon	NA	NA
cg20328456	2.30938e-12	0.00818572	0.29789	chr6	32121113	PPT2;PPT2;PRRT1	TSS200;TSS1500;TSS1500	NA	NA
cg00582562	2.31333e-12	0.00886326	0.536919	chr17	46388465	SKAP1;SKAP1	Body;Body	NA	NA
cg19628934	2.39037e-12	0.0070919	0.736313	chr14	77499391			NA	NA
cg23730027	2.44281e-12	-0.00779576	0.489617	chr3	57995180	FLNB;FLNB;FLNB;FLNB	Body;Body;Body;Body	NA	NA
cg27019717	2.50648e-12	-0.00568629	0.526061	chr14	52351055	GNG2	5'UTR	NA	NA
cg02466798	2.55141e-12	-0.00547929	0.736225	chr19	941571	ARID3A	Body	NA	NA
cg07196577	2.63279e-12	0.00515187	0.745708	chr1	109850486	MYBPHL	TSS1500	NA	NA
cg06164260	2.63829e-12	-0.00464856	0.77372	chr3	187454439	BCL6;BCL6	5'UTR;TSS200	NA	NA
cg13993853	2.66165e-12	0.00169791	0.570457	chr13	21277342	IL17D	TSS200	NA	NA
cg24119717	2.69596e-12	0.00548145	0.910879	chr5	139488731			NA	NA
cg05241536	2.73888e-12	0.00366487	0.429122	chr10	121298236	RGS10	Body	NA	NA
cg01572884	2.7705e-12	0.00416585	0.851964	chr1	110610266	ALX3	Body	NA	NA
cg00442282	2.84689e-12	-0.00366904	0.613305	chr17	38471064	RARA	5'UTR	NA	NA
cg21166916	2.89031e-12	0.00342942	0.214783	chr22	42316481			NA	NA
cg07719604	2.9812e-12	-0.00519646	0.657765	chr16	67232460	ELMO3;E2F4	TSS1500;3'UTR	NA	NA
cg26815802	3.01615e-12	0.0016776	0.787647	chr7	44613874	DDX56;DDX56	1stExon;5'UTR	NA	NA
cg24956866	3.02516e-12	0.00511363	0.455461	chr7	134464129	CALD1;CALD1;CALD1	TSS200;TSS200;TSS200	NA	NA
cg13536265	3.04985e-12	0.00384554	0.579962	chr14	24836539	NFATC4;NFATC4	Body;TSS1500	NA	NA
cg16426670	3.0546e-12	0.0077984	0.74054	chr20	2675996	EBF4	Body	NA	NA
cg09580592	3.07883e-12	0.0084814	0.753023	chr17	907643	ABR;ABR;ABR	3'UTR;3'UTR;3'UTR	NA	NA
cg15428620	3.08984e-12	-0.00427911	0.449514	chr10	102792835	SFXN3	Body	NA	NA
cg03297901	3.13534e-12	-0.00617572	0.913524	chr17	76117767	TMC6;TMC6	Body;Body	NA	NA
cg11828203	3.17001e-12	0.00427522	0.562772	chr7	31014714	GHRHR;GHRHR	Body;Body	NA	NA
cg07951519	3.19201e-12	0.00170691	0.559252	chr17	4607306	PELP1	1stExon	NA	NA
cg11455018	3.22444e-12	0.00136474	0.680518	chr16	30709778	SRCAP	TSS1500	NA	NA
cg03479289	3.24883e-12	-0.00582373	0.502147	chr11	33563377	C11orf41	TSS1500	NA	NA
cg18854666	3.26736e-12	-0.00429665	0.730138	chr2	219247055	SLC11A1;SLC11A1	1stExon;5'UTR	NA	NA
cg13873632	3.29924e-12	0.00502152	0.0465094	chr4	16853974	LDB2;LDB2	Body;Body	NA	NA
cg03366285	3.37482e-12	0.00387433	0.832142	chr15	83474726	FSD2;FSD2	5'UTR;1stExon	NA	NA
cg26069068	3.42056e-12	0.00575629	0.735056	chr8	125741265	MTSS1	TSS1500	NA	NA
cg09238801	3.45499e-12	-0.00570573	0.559494	chr14	74179101	PNMA1;PNMA1	1stExon;3'UTR	NA	NA
cg17163527	3.45877e-12	-0.00765404	0.232161	chr1	3447348	MEGF6	Body	NA	NA
cg23548163	3.47848e-12	0.0154448	0.868943	chr19	46807119	HIF3A;HIF3A;HIF3A	5'UTR;Body;Body	NA	NA
cg02872623	3.53214e-12	0.00169997	0.688752	chr3	185304179	SENP2;SENP2	1stExon;5'UTR	NA	NA
cg07693037	3.58895e-12	0.00157013	0.597213	chr3	128216748			NA	NA
cg06498520	3.59157e-12	-0.0055083	0.841921	chr4	186990006	TLR3	TSS1500	NA	NA
cg25960090	3.60998e-12	0.00595393	0.62023	chr5	127277370			NA	NA
cg08080174	3.69948e-12	0.00564957	0.282605	chr16	72992580	ZFHX3;ZFHX3	Body;5'UTR	NA	NA
cg15016701	3.76014e-12	-0.00597272	0.382826	chr12	63211683	PPM1H	Body	NA	NA
cg20053885	3.76335e-12	0.00705383	0.729439	chr12	101988604	MYBPC1;MYBPC1;MYBPC1;MYBPC1	TSS200;TSS200;TSS200;TSS200	NA	NA
cg18028767	3.79112e-12	-0.00530046	0.938306	chr11	859873	TSPAN4;TSPAN4;TSPAN4;TSPAN4;TSPAN4;TSPAN4;TSPAN4	5'UTR;Body;Body;Body;Body;Body;Body	NA	NA
cg08122899	3.88105e-12	0.00397698	0.383413	chr3	49499574			NA	NA
cg02946294	3.88185e-12	0.00453622	0.74129	chr11	17034844	PLEKHA7	Body	NA	NA
cg18855140	3.96963e-12	0.00145272	0.637959	chr11	114271182	C11orf71;RBM7	TSS200;TSS1500	NA	NA
cg16198723	4.06768e-12	0.00690249	0.575597	chr3	112359557	CCDC80;CCDC80;CCDC80	5'UTR;1stExon;5'UTR	NA	NA
cg11321035	4.10618e-12	-0.00370553	0.203389	chr19	13944814			NA	NA
cg01168584	4.18114e-12	-0.00620645	0.53739	chr18	2903245	EMILIN2	Body	NA	NA
cg03337084	4.26127e-12	0.00419872	0.258103	chr6	31646061	LY6G5C	Body	NA	NA
cg19672145	4.30804e-12	0.00449062	0.597455	chr2	65571891	SPRED2;SPRED2	Body;Body	NA	NA
cg09554443	4.309e-12	-0.00546241	0.152974	chr1	167487762	CD247;CD247;CD247;CD247	1stExon;5'UTR;1stExon;5'UTR	NA	NA
cg27005487	4.32324e-12	0.0057776	0.0126243	chr17	59484388	TBX2	Body	NA	NA
cg07357157	4.33603e-12	-0.00621732	0.395834	chr1	10690588	PEX14	3'UTR	NA	NA
cg21968765	4.46544e-12	0.00670414	0.664335	chr3	100712345	ABI3BP	TSS200	NA	NA
cg11727252	4.51872e-12	0.00452534	0.552155	chr3	51752143	GRM2;GRM2	3'UTR;3'UTR	NA	NA
cg01258789	4.80607e-12	0.00637178	0.691345	chr1	197237257	CRB1	TSS200	NA	NA
cg24020157	4.83774e-12	-0.00759323	0.865677	chr10	43697521	RASGEF1A	Body	NA	NA
cg17779658	4.95366e-12	-0.00588535	0.194512	chr8	29606753	C8orf75	TSS1500	NA	NA
cg00539049	4.96979e-12	0.00389985	0.527429	chr2	149933534	LYPD6B	5'UTR	NA	NA
cg25426560	5.00969e-12	0.00143741	0.995581	chr6	30640776	DHX16;DHX16;DHX16;DHX16	1stExon;1stExon;5'UTR;5'UTR	NA	NA
cg07728579	5.04656e-12	0.00565823	0.934444	chr15	83475013	FSD2	TSS1500	NA	NA
cg11436362	5.07539e-12	-0.00708884	0.621318	chr11	67053929	ADRBK1	3'UTR	-6.03	2.6e-09
cg03652525	5.13577e-12	0.00478523	0.650041	chr3	72149324			NA	NA
cg01999701	5.18048e-12	0.00601114	0.600907	chr3	184456165			NA	NA
cg21301224	5.20317e-12	-0.00586182	0.177709	chr8	56813677	LYN;LYN	5'UTR;5'UTR	NA	NA
cg03732020	5.2969e-12	-0.00714305	0.919272	chr11	47282968	NR1H3;NR1H3;NR1H3	Body;Body;Body	NA	NA
cg07430820	5.48115e-12	-0.00337943	0.960844	chr17	7792191	CHD3;CHD3;CHD3;CHD3;CHD3	Body;1stExon;5'UTR;1stExon;5'UTR	NA	NA
cg04592976	5.52062e-12	0.00142508	0.903117	chr16	89984572	MC1R;MC1R	5'UTR;1stExon	NA	NA
cg11254532	5.58345e-12	0.00620967	0.401068	chr1	61520399			NA	NA
cg22284058	5.64945e-12	0.00601562	0.644165	chr8	142237359	SLC45A4	Body	NA	NA
cg06457011	5.67872e-12	-0.00691996	0.860469	chr20	39767490	PLCG1;PLCG1	Body;Body	NA	NA
cg13136655	5.70292e-12	-0.00546663	0.00410883	chr6	149806131	ZC3H12D;ZC3H12D	5'UTR;1stExon	NA	NA
cg15239263	5.7887e-12	0.00148586	0.764099	chr16	31086047	ZNF668;ZNF646	TSS1500;5'UTR	NA	NA
cg14479136	5.79118e-12	-0.00469718	0.0745768	chr9	139222701	GPSM1;GPSM1;LOC26102	Body;Body;TSS1500	NA	NA
cg23739746	5.8106e-12	-0.00637937	0.726655	chr13	114905867			NA	NA
cg08276042	6.01935e-12	-0.00520101	0.419447	chr16	2740348	KCTD5	Body	NA	NA
cg06687489	6.13554e-12	-0.00630186	0.0374579	chr15	52587077	MYO5C	Body	NA	NA
cg17896927	6.14155e-12	-0.00921235	0.178098	chr15	93617030	RGMA;RGMA;RGMA;RGMA;RGMA;RGMA;RGMA	1stExon;Body;5'UTR;TSS200;TSS200;TSS1500;5'UTR	NA	NA
cg07941983	6.22779e-12	-0.00471104	0.701828	chr4	36245138	ARAP2	5'UTR	NA	NA
cg06804344	6.26086e-12	0.00676824	0.666428	chr3	128778699	GP9	TSS1500	NA	NA
cg14605021	6.31312e-12	0.00297038	0.71063	chr8	16859754	FGF20	TSS200	NA	NA
cg24683623	6.34774e-12	0.00608777	0.39334	chr4	123747447	FGF2	TSS1500	NA	NA
cg04945216	6.38041e-12	-0.0100377	0.0482618	chr7	3186788			NA	NA
cg20337305	6.52673e-12	0.00164811	0.638098	chr14	58711896	PSMA3;PSMA3	Body;Body	NA	NA
cg21404980	6.7057e-12	-0.00722763	0.455502	chr8	144599027	ZC3H3	Body	NA	NA
cg00873517	6.73335e-12	-0.00719663	0.271649	chr8	136511832	KHDRBS3	Body	NA	NA
cg14276580	6.96853e-12	-0.00565884	0.524619	chr13	40527020			NA	NA
cg08633665	7.19277e-12	0.00363065	0.560481	chr8	128972829	MIR1205;PVT1	TSS200;Body	NA	NA
cg11268834	7.24182e-12	-0.00549771	0.325374	chr2	224824500	MRPL44	Body	NA	NA
cg10304534	7.29396e-12	0.00712754	0.153047	chr13	95844361	ABCC4;ABCC4	Body;Body	NA	NA
cg25143652	7.30899e-12	-0.00523987	0.35001	chr20	62168670	PTK6;PTK6	1stExon;5'UTR	NA	NA
cg20914572	7.32719e-12	0.00434797	0.754756	chr6	32119874	PRRT1;PPT2	TSS200;TSS1500	NA	NA
cg02789485	7.34686e-12	-0.00588483	0.27114	chr12	75783428	GLIPR1L2	TSS1500	NA	NA
cg03928384	7.56099e-12	-0.00574944	0.0625729	chr3	46395191	CCR2;CCR2	TSS200;TSS200	NA	NA
cg22778014	7.67505e-12	0.00416794	0.618466	chr4	109811985	COL25A1;COL25A1	Body;Body	NA	NA
cg12345526	7.81818e-12	-0.00671211	0.746257	chr2	173159062			NA	NA
cg18030453	8.18521e-12	0.0045202	0.848482	chr3	45506216	LARS2	Body	NA	NA
cg20787693	8.20823e-12	0.00161648	0.671433	chr1	26147374	FAM54B;FAM54B;FAM54B;FAM54B;LOC646471;FAM54B	1stExon;5'UTR;5'UTR;5'UTR;Body;5'UTR	NA	NA
cg02205445	8.22669e-12	0.00364366	0.227839	chr2	144648543			NA	NA
cg21581504	8.34092e-12	0.00627925	0.174203	chr2	68545960	CNRIP1;CNRIP1	Body;Body	NA	NA
cg01498832	8.48218e-12	-0.00625914	0.627812	chr17	78682934	RPTOR;RPTOR	Body;Body	NA	NA
cg07276621	8.49924e-12	0.00606887	0.574398	chr11	10750870			NA	NA
cg25171348	8.51988e-12	0.0048371	0.858565	chr7	28448200	CREB5	5'UTR	NA	NA
cg06759518	8.57484e-12	0.00535905	0.51427	chr3	72496799	RYBP	TSS1500	NA	NA
cg01394847	8.57613e-12	0.00706993	0.715726	chr16	73101069			NA	NA
cg07181376	8.66829e-12	0.00152274	0.16308	chr16	58035192	C16orf57;ZNF319	TSS200;TSS1500	NA	NA
cg04466886	8.86207e-12	-0.0039666	0.687191	chr16	66521191			NA	NA
cg01939479	8.93974e-12	0.00137989	0.721366	chr15	31195982	MTMR15;MTMR15;MTMR15;MTMR15	TSS200;TSS200;TSS200;TSS200	NA	NA
cg20033652	8.96335e-12	-0.00539237	0.248254	chr14	51290662	NIN;NIN;NIN;NIN	5'UTR;5'UTR;TSS1500;5'UTR	NA	NA
cg21109038	8.98739e-12	0.0082938	0.0709841	chr15	90543610	ZNF710	TSS1500	NA	NA
cg25288155	9.02101e-12	0.00579816	0.0990496	chr11	73357396	PLEKHB1;PLEKHB1;PLEKHB1;PLEKHB1;PLEKHB1;PLEKHB1	5'UTR;1stExon;5'UTR;TSS1500;TSS1500;1stExon	NA	NA
cg04004830	9.22136e-12	-0.00482888	0.666402	chr2	192711243	SDPR	1stExon	NA	NA
cg07351143	9.3684e-12	0.00386713	0.389221	chr10	22623910			NA	NA
cg19884546	9.40629e-12	0.00147679	0.882446	chr22	38082237	NOL12	TSS200	NA	NA
cg17986992	9.4571e-12	0.00921003	0.311016	chr1	159825761	VSIG8;C1orf204	Body;TSS1500	NA	NA
cg02228160	9.62861e-12	-0.00478404	0.251455	chr5	143192067	HMHB1	Body	NA	NA
cg13139542	9.65278e-12	0.00538914	0.811673	chr2	8242815			NA	NA
cg14775286	9.65933e-12	0.00527444	0.886838	chr3	137833494	DZIP1L;DZIP1L	5'UTR;TSS1500	NA	NA
cg04188920	9.76908e-12	-0.00743359	0.174233	chr10	3138534	PFKP	Body	NA	NA
cg19258882	9.82981e-12	0.00380461	0.829849	chr12	56472805	ERBB3;ERBB3	TSS1500;TSS1500	NA	NA
cg05409945	9.87606e-12	0.00553306	0.185752	chr12	52604025	LOC283404	TSS1500	NA	NA
cg05793930	9.9527e-12	0.004932	0.202546	chr1	110204227	GSTM4;GSTM4;GSTM4	Body;3'UTR;Body	NA	NA
cg24873093	1.01082e-11	-0.00488796	0.164662	chr1	45991060			NA	NA
cg08439728	1.01221e-11	0.00380228	0.304399	chr6	31097073	PSORS1C1	5'UTR	NA	NA
cg05014727	1.01483e-11	-0.00765186	0.867536	chr10	6214016	PFKFB3	Body	NA	NA
cg22321327	1.02208e-11	-0.00515493	0.472993	chr11	47639458	MTCH2	3'UTR	NA	NA
cg01121022	1.03717e-11	0.00391963	0.496495	chr14	104338788			NA	NA
cg16940801	1.04404e-11	0.00165292	0.655817	chr15	72523516	PKM2;PKM2;PKM2;PKM2;PKM2;PKM2	1stExon;5'UTR;5'UTR;1stExon;1stExon;5'UTR	NA	NA
cg21376799	1.05487e-11	0.0068733	0.372682	chr6	30094960			NA	NA
cg03750061	1.06103e-11	-0.00465422	0.90742	chr10	119131167	PDZD8	Body	NA	NA
cg20512303	1.0762e-11	0.00504558	0.300821	chr5	131592959	PDLIM4;PDLIM4	TSS1500;TSS1500	NA	NA
cg22907189	1.10664e-11	-0.00394574	0.0547213	chr5	172430563	ATP6V0E1	Body	NA	NA
cg22530449	1.10841e-11	-0.00727355	0.731006	chr3	184560962	VPS8;VPS8	Body;Body	NA	NA
cg13587908	1.13354e-11	-0.00414368	0.730591	chr9	139616233	FAM69B	Body	NA	NA
cg24247370	1.15256e-11	-0.00407022	0.0505374	chr13	99142703	STK24;STK24	Body;Body	NA	NA
cg21577233	1.15988e-11	0.00149876	0.541932	chr1	201507860			NA	NA
cg04257388	1.16124e-11	0.00546797	0.399049	chr10	16741464	RSU1;RSU1	Body;Body	NA	NA
cg04463638	1.1739e-11	0.00733576	0.207037	chr22	19512712	CLDN5;CLDN5;CLDN5;CLDN5	1stExon;1stExon;5'UTR;5'UTR	5.82	8.9e-09
cg06250734	1.17417e-11	0.00138714	0.834136	chr16	46723432	ORC6L;VPS35	TSS200;TSS1500	NA	NA
cg02194129	1.18813e-11	-0.00620195	0.0807661	chr14	104171313	XRCC3;XRCC3;XRCC3	Body;Body;Body	NA	NA
cg14246703	1.19773e-11	0.0059708	0.610153	chr9	138869077			NA	NA
cg22928599	1.2097e-11	0.00405495	0.949226	chr19	46999403	PNMAL2	TSS1500	NA	NA
cg11039241	1.22951e-11	-0.00736392	0.550946	chr17	186214	RPH3AL	5'UTR	NA	NA
cg21922731	1.24434e-11	0.00305143	0.723326	chr12	57157130	HSD17B6;HSD17B6	5'UTR;1stExon	NA	NA
cg20843286	1.24892e-11	0.00139679	0.876798	chr10	102045959	BLOC1S2;BLOC1S2;BLOC1S2	Body;5'UTR;1stExon	NA	NA
cg14732969	1.26511e-11	0.00644616	0.130433	chr3	97542158			NA	NA
cg16675054	1.27208e-11	0.00568316	0.122833	chr5	171616574	STK10	TSS1500	NA	NA
cg04345034	1.27924e-11	-0.0049118	0.705471	chr15	70797389			NA	NA
cg15085899	1.28367e-11	-0.0123498	0.957397	chr12	125003064	NCOR2;NCOR2	5'UTR;5'UTR	NA	NA
cg25050026	1.28975e-11	0.00378625	0.64542	chr3	158519410	MFSD1;MFSD1	TSS1500;TSS1500	NA	NA
cg00962029	1.2918e-11	0.00133156	0.416292	chr16	4475691	DNAJA3;DNAJA3	TSS200;TSS200	NA	NA
cg07361491	1.33606e-11	0.00144754	0.977958	chr18	19749535	GATA6;GATA6	5'UTR;1stExon	NA	NA
cg15717719	1.33912e-11	0.00145911	0.722203	chr2	24150218	ATAD2B	TSS1500	NA	NA
cg18515031	1.34251e-11	-0.00410585	0.947141	chr10	73988469	C10orf104	Body	NA	NA
cg14499274	1.35755e-11	0.00758823	0.962328	chr9	136705398	VAV2;VAV2	Body;Body	NA	NA
cg24636368	1.35876e-11	0.00832905	0.879036	chr17	46388447	SKAP1;SKAP1	Body;Body	NA	NA
cg00646396	1.3604e-11	0.00386696	0.954159	chr1	26482755			NA	NA
cg13714797	1.36641e-11	0.00605233	0.186091	chr9	7103479	KDM4C;KDM4C	Body;Body	NA	NA
cg24824686	1.36685e-11	0.00921237	0.656111	chr10	129797777	PTPRE	5'UTR	NA	NA
cg26799474	1.36856e-11	-0.00886256	0.158112	chr2	202098951	CASP8;CASP8;CASP8;CASP8	5'UTR;5'UTR;5'UTR;5'UTR	NA	NA
cg22065514	1.38803e-11	0.00586533	0.19132	chr3	48602040	COL7A1;UCN2	Body;TSS1500	NA	NA
cg06832677	1.39561e-11	-0.00597834	0.2166	chr2	119976764			NA	NA
cg17356733	1.40029e-11	-0.00562537	0.402386	chr21	34774627	IFNGR2	TSS1500	NA	NA
cg07264048	1.4029e-11	0.0113625	0.969715	chr6	10556326	GCNT2;GCNT2;GCNT2	5'UTR;1stExon;Body	NA	NA
cg22805485	1.40764e-11	0.0074098	0.55141	chr11	13983818	SPON1	TSS200	NA	NA
cg12488187	1.41048e-11	-0.00577011	0.465506	chr12	65671664	MSRB3;MSRB3	TSS1500;TSS1500	NA	NA
cg14906690	1.42158e-11	0.00782522	0.972386	chr10	76573506			NA	NA
cg25928629	1.42869e-11	0.00603387	0.682848	chr2	218515567	DIRC3	Body	NA	NA
cg20286956	1.43355e-11	0.0078588	0.749853	chr1	39547918	MACF1	5'UTR	NA	NA
cg15552493	1.48594e-11	0.0047916	0.0410556	chr2	102387391	MAP4K4;MAP4K4;MAP4K4	Body;Body;Body	NA	NA
cg08764162	1.4872e-11	-0.00469536	0.35961	chr10	31147088	ZNF438;ZNF438;ZNF438;ZNF438;ZNF438;ZNF438;ZNF438;ZNF438	Body;5'UTR;Body;5'UTR;Body;Body;5'UTR;Body	NA	NA
cg01750375	1.50842e-11	-0.00559915	0.701907	chr20	43343365	WISP2	TSS1500	NA	NA
cg27565899	1.51393e-11	-0.00529856	0.926608	chr1	110166664	AMPD2;AMPD2;AMPD2	Body;Body;TSS1500	NA	NA
cg04834534	1.51909e-11	0.00133593	0.820996	chr5	175815541	NOP16;HIGD2A	TSS200;TSS1500	NA	NA
cg18727936	1.52144e-11	0.00477248	0.603806	chr10	135051044	VENTX	TSS1500	NA	NA
cg18201671	1.54592e-11	0.0054439	0.805743	chr1	223317548	TLR5	TSS1500	NA	NA
cg03438520	1.56455e-11	0.00138004	0.325211	chr13	77600571	FBXL3	5'UTR	NA	NA
cg13783786	1.57058e-11	0.00517734	0.369366	chr9	112697363	PALM2;PALM2-AKAP2;PALM2;PALM2-AKAP2	Body;Body;Body;Body	NA	NA
cg19499884	1.57135e-11	-0.00645021	0.586113	chr10	102760724	LZTS2	5'UTR	NA	NA
cg19592472	1.60189e-11	-0.00916415	0.788653	chr20	3052274	OXT;OXT	1stExon;5'UTR	NA	NA
cg09999250	1.61393e-11	0.00112938	0.333432	chr5	68462783	CCNB1	TSS200	NA	NA
cg19851816	1.62926e-11	-0.0115931	0.526478	chr22	50657907	TUBGCP6	Body	NA	NA
cg02327719	1.63806e-11	0.0039031	0.53026	chr1	26185386	C1orf135	Body	NA	NA
cg18592365	1.64069e-11	0.00402476	0.331722	chr1	79472536	ELTD1	TSS200	NA	NA
cg07705835	1.65922e-11	-0.00377497	0.671178	chr3	9959128	IL17RC;IL17RC;IL17RC	Body;1stExon;Body	NA	NA
cg13856340	1.67475e-11	-0.00564166	0.761976	chr9	127888818	SCAI;SCAI	Body;Body	NA	NA
cg11196848	1.6771e-11	0.00740383	0.355237	chr8	16859833	FGF20	TSS200	NA	NA
cg11969813	1.68837e-11	-0.0061114	0.0383651	chr17	79816559	P4HB	Body	NA	NA
cg06664254	1.69142e-11	-0.00677742	0.705868	chr16	75628226			NA	NA
cg23145336	1.77237e-11	0.00573165	0.14374	chr6	32060816	TNXB	Body	NA	NA
cg00812761	1.80586e-11	0.00455555	0.529469	chr4	53799391	SCFD2	Body	NA	NA
cg01814186	1.80945e-11	0.00144734	0.678377	chr16	69600788	NFAT5;NFAT5;NFAT5;NFAT5;MIR1538;NFAT5	5'UTR;Body;Body;5'UTR;TSS1500;Body	NA	NA
cg01634146	1.81847e-11	0.00708308	0.556901	chr19	13127389	NFIX	Body	NA	NA
cg05387269	1.85389e-11	-0.00667636	0.283272	chr1	1306946			NA	NA
cg12743470	1.8663e-11	0.00624536	0.864323	chr14	74815085	C14orf115	TSS200	NA	NA
cg00458681	1.86639e-11	-0.00860719	0.937705	chr22	19010419	DGCR10	Body	NA	NA
cg02483931	1.87255e-11	0.00444223	0.796807	chr17	34202461	CCL5	Body	NA	NA
cg16883533	1.88199e-11	0.00151682	0.996006	chr12	7079667	PHB2;EMG1;PHB2	1stExon;TSS1500;1stExon	NA	NA
cg27504369	1.90287e-11	-0.00574912	0.821274	chr22	39353550	APOBEC3A;APOBEC3A	1stExon;5'UTR	-5.85	7.4e-09
cg16730908	1.91141e-11	0.00447365	0.211183	chr18	43652592	PSTPIP2	TSS1500	NA	NA
cg07324381	1.95262e-11	-0.00465451	0.403053	chr9	139222968	GPSM1;GPSM1;LOC26102	Body;Body;TSS1500	NA	NA
cg02983090	1.96931e-11	-0.00743412	0.905149	chr16	27437892	IL21R;IL21R;IL21R	TSS1500;5'UTR;5'UTR	NA	NA
cg12242450	2.01057e-11	0.0125516	0.54964	chr6	10555808	GCNT2;GCNT2	TSS200;Body	NA	NA
cg08899895	2.01916e-11	-0.00725717	0.677309	chr16	85684853	KIAA0182;KIAA0182	Body;Body	NA	NA
cg23516824	2.03618e-11	-0.00390536	0.0705793	chr5	76134399			NA	NA
cg13695646	2.05314e-11	0.00617267	0.53946	chr5	78407509	BHMT	TSS200	NA	NA
cg08951907	2.06568e-11	0.00127787	0.448915	chr17	18218556	TOP3A;SMCR8	TSS1500;TSS200	NA	NA
cg10791696	2.08626e-11	0.00584683	0.551284	chr10	43818911			NA	NA
cg14142087	2.09993e-11	-0.00505719	0.130032	chr9	110479859			NA	NA
cg11199014	2.11047e-11	0.00742458	0.158148	chr19	39798563	LRFN1	Body	NA	NA
cg27615366	2.14816e-11	0.00430851	0.446035	chr5	131592974	PDLIM4;PDLIM4	TSS1500;TSS1500	NA	NA
cg07349815	2.16113e-11	0.00614372	0.301466	chr3	123751269			NA	NA
cg25995980	2.1791e-11	0.00347978	0.294043	chr10	46993515	GPRIN2	TSS200	NA	NA
cg02768162	2.1903e-11	0.00465567	0.491611	chr12	108992148	TMEM119	TSS1500	NA	NA
cg16767506	2.20984e-11	-0.00969549	0.149435	chr7	142494244			NA	NA
cg15777760	2.2118e-11	-0.00450517	0.488124	chr16	29832180	C16orf53;MVP;MVP	3'UTR;5'UTR;5'UTR	NA	NA
cg24839718	2.2394e-11	0.00187197	0.940057	chr19	37568953	ZNF420	TSS1500	NA	NA
cg18822950	2.24614e-11	0.00311211	0.686596	chr17	46810934			NA	NA
cg05669285	2.25537e-11	0.0016002	0.594515	chr8	48873906	MCM4;MCM4;PRKDC;PRKDC	Body;Body;TSS1500;TSS1500	NA	NA
cg06825512	2.26699e-11	0.00762995	0.34528	chr18	10453969	APCDD1	TSS1500	NA	NA
cg23014759	2.26789e-11	0.00626682	0.0141654	chr1	147059047	BCL9	5'UTR	NA	NA
cg16876823	2.29829e-11	0.00480276	0.970561	chr19	2987082	TLE6;TLE6	Body;Body	NA	NA
cg04322572	2.29918e-11	0.00952955	0.117071	chr10	43447618			NA	NA
cg23624621	2.30066e-11	-0.00691715	0.155836	chr4	74731300			NA	NA
cg08701183	2.33804e-11	0.0065823	0.964478	chr7	21209781			NA	NA
cg14916382	2.35585e-11	0.00124814	0.621361	chr5	49962977	PARP8	1stExon	NA	NA
cg02768283	2.35989e-11	0.00145057	0.660303	chr3	51573192			NA	NA
cg14986464	2.36392e-11	-0.00437487	0.677453	chr6	31669902	BAT5	Body	NA	NA
cg06238004	2.36898e-11	0.0114293	0.805162	chr17	42029727			NA	NA
cg04359418	2.37393e-11	0.00704372	0.253186	chr10	76573396			NA	NA
cg12085660	2.38032e-11	0.00160296	0.599107	chr19	44124104	ZNF428	TSS200	NA	NA
cg08370173	2.38143e-11	0.00544226	0.904955	chr17	75537444			NA	NA
cg08318732	2.38763e-11	-0.007277	0.797316	chr19	53192577	ZNF83	Body	NA	NA
cg17942328	2.40919e-11	0.00143476	0.826488	chr20	34542602	SCAND1;SCAND1	TSS200;TSS200	NA	NA
cg13573513	2.41688e-11	0.0052546	0.781461	chr12	14996143	ART4;ART4	5'UTR;1stExon	NA	NA
cg04105091	2.4637e-11	0.00441091	0.725437	chr6	32121355	PPT2;PPT2;PPT2	TSS1500;1stExon;5'UTR	NA	NA
cg20315554	2.46447e-11	-0.00580012	0.116878	chr12	65676662	MSRB3;MSRB3	5'UTR;Body	NA	NA
cg11985480	2.47093e-11	0.00754876	0.844087	chr2	74729100	LOC151534;LBX2	TSS1500;Body	NA	NA
cg05437446	2.49449e-11	-0.00597727	0.929436	chr13	113622743	MCF2L	TSS200	NA	NA
cg11672277	2.49628e-11	0.00723343	0.962674	chr18	32556104	MAPRE2	TSS1500	NA	NA
cg14292870	2.54819e-11	0.00655134	0.132101	chr12	6887543	LAG3	Body	NA	NA
cg15901783	2.54863e-11	0.00764886	0.441054	chr13	77461426	KCTD12	TSS1500	NA	NA
cg11934832	2.5671e-11	0.00597851	0.0190107	chr18	45683841			5.65	2.3e-08
cg07037725	2.57536e-11	0.00555905	0.50164	chr5	141699580	SPRY4;SPRY4	5'UTR;5'UTR	NA	NA
cg26723524	2.58233e-11	-0.00757529	0.430903	chr7	39775803	LOC349114	Body	NA	NA
cg24718903	2.59954e-11	0.00641094	0.563123	chr19	50138797	RRAS	3'UTR	NA	NA
cg14190522	2.6085e-11	0.00702958	0.625876	chr9	124344221	DAB2IP	Body	NA	NA
cg08027484	2.63594e-11	0.00671552	0.811873	chr6	10556523	GCNT2;GCNT2;GCNT2	5'UTR;1stExon;Body	NA	NA
cg11482879	2.65062e-11	0.0090222	0.399067	chr17	4480083			NA	NA
cg05203213	2.67245e-11	0.00527145	0.442783	chr2	73419551			NA	NA
cg06299037	2.75834e-11	0.0012452	0.354911	chr19	40971696	SPTBN4;BLVRB;BLVRB	TSS1500;5'UTR;1stExon	NA	NA
cg04830409	2.77118e-11	0.00146277	0.667812	chr12	64615927	C12orf66	1stExon	NA	NA
cg27004669	2.77651e-11	0.00619387	0.203144	chr22	28010598			NA	NA
cg17808882	2.79861e-11	0.00489416	0.438093	chr8	16859924	FGF20	TSS1500	NA	NA
cg00112238	2.84583e-11	-0.00525843	0.946723	chr1	54719938	SSBP3;SSBP3;SSBP3	Body;Body;Body	NA	NA
cg00138497	2.85638e-11	0.00171709	0.461541	chr9	139760673	EDF1;EDF1	1stExon;1stExon	NA	NA
cg13975062	2.86396e-11	0.00148517	0.440225	chr3	108308228	KIAA1524;DZIP3;KIAA1524	5'UTR;TSS200;1stExon	NA	NA
cg19818308	2.87709e-11	0.00486913	0.654426	chr14	75946745			NA	NA
cg08021348	2.88514e-11	0.00415144	0.693292	chr2	20280676			NA	NA
cg15015109	2.91736e-11	-0.00365031	0.999638	chr17	65136480	HELZ	Body	NA	NA
cg11386376	2.92148e-11	0.00368169	0.385494	chr1	55106106	C1orf175;C1orf175	TSS1500;TSS1500	NA	NA
cg03213259	2.92327e-11	0.00599406	0.932542	chr16	67189948	TRADD	Body	NA	NA
cg11757040	2.94375e-11	0.00637329	0.991773	chr14	73209188	DPF3	Body	NA	NA
cg08133584	2.9514e-11	0.00701579	0.507452	chr16	609679	C16orf11	TSS1500	NA	NA
cg04340651	2.95888e-11	-0.00714428	0.434764	chr15	93617080	RGMA;RGMA;RGMA;RGMA;RGMA;RGMA;RGMA	1stExon;Body;5'UTR;TSS200;TSS200;TSS1500;5'UTR	NA	NA
cg20525527	2.96235e-11	-0.00479916	0.699467	chr17	17056629	MPRIP;MPRIP	Body;Body	NA	NA
cg13464062	2.97093e-11	0.00155907	0.537219	chr7	33148868	RP9	1stExon	NA	NA
cg20348196	2.97938e-11	-0.00832973	0.0814564	chr6	32408284	HLA-DRA	Body	NA	NA
cg02815053	3.01455e-11	0.00150018	0.863988	chr2	3381671	TSSC1	TSS200	NA	NA
cg21574435	3.03579e-11	0.00150193	0.740698	chr3	49027409	P4HTM;P4HTM;P4HTM;P4HTM	5'UTR;1stExon;5'UTR;1stExon	NA	NA
cg26957187	3.12013e-11	-0.00814689	0.245917	chr7	71799982	CALN1;CALN1	5'UTR;Body	NA	NA
cg10494848	3.12508e-11	0.00404098	0.687107	chr6	57127617			NA	NA
cg15542713	3.13926e-11	-0.0101634	0.611606	chr1	42385581	HIVEP3;HIVEP3	TSS1500;TSS1500	NA	NA
cg01234929	3.20105e-11	0.0012837	0.149809	chr11	4115909	RRM1	TSS200	NA	NA
cg05857996	3.21028e-11	0.00828353	0.328708	chr20	2675418	EBF4	Body	5.81	9.3e-09
cg00771688	3.22415e-11	0.00132466	0.155465	chr2	120124593	C2orf76;DBI;DBI;DBI;DBI	TSS1500;5'UTR;TSS200;TSS1500;1stExon	NA	NA
cg16348385	3.23533e-11	-0.00497491	0.331794	chr16	30106822	YPEL3;YPEL3;YPEL3	1stExon;5'UTR;5'UTR	NA	NA
cg25937577	3.26328e-11	0.00595931	0.383149	chr22	31536476	PLA2G3	TSS200	NA	NA
cg23987137	3.26344e-11	0.00436654	0.670659	chr5	58653624	PDE4D;PDE4D;PDE4D	Body;Body;Body	NA	NA
cg09119776	3.29266e-11	0.00617865	0.208882	chr10	104387263	SUFU	Body	NA	NA
cg21175307	3.29382e-11	0.00151948	0.408575	chr15	69110447	ANP32A	Body	NA	NA
cg05217983	3.31024e-11	-0.00618404	0.774641	chr6	45406867	RUNX2;RUNX2;RUNX2	Body;Body;Body	NA	NA
cg03848580	3.3255e-11	-0.00674483	0.923711	chr17	76113713	TMC6;TMC6	Body;Body	NA	NA
cg13586051	3.34957e-11	-0.00509147	0.911756	chr3	58200471	DNASE1L3	TSS200	NA	NA
cg10619144	3.36481e-11	0.00115296	0.984684	chr18	43677957	ATP5A1;ATP5A1	Body;Body	NA	NA
cg14864103	3.37332e-11	-0.00651168	0.448366	chr13	113622738	MCF2L	TSS200	NA	NA
cg01083340	3.39276e-11	0.00156066	0.922302	chr11	66176265			NA	NA
cg03531211	3.40343e-11	-0.00509703	0.168767	chr6	32920102	HLA-DMA	Body	NA	NA
cg16253634	3.47929e-11	0.00520225	0.612346	chr7	134464123	CALD1;CALD1;CALD1	TSS200;TSS200;TSS200	NA	NA
cg06088759	3.49222e-11	0.00365013	0.359185	chr1	166890644	ILDR2	Body	NA	NA
cg26047066	3.5181e-11	0.0126816	0.274319	chr1	221069136			NA	NA
cg07664358	3.56444e-11	0.0013861	0.667085	chr11	125439729	EI24;EI24	5'UTR;5'UTR	NA	NA
cg25431974	3.59583e-11	0.00392088	0.100143	chr2	233352936	ECEL1	TSS1500	NA	NA
cg07858848	3.61637e-11	-0.00636857	0.353101	chr2	43087177			NA	NA
cg16092991	3.64077e-11	0.00178557	0.697313	chr4	15004611	CPEB2;CPEB2	TSS1500;TSS1500	NA	NA
cg06357743	3.67363e-11	0.00613375	0.45027	chr6	30041727	RNF39;RNF39	Body;Body	NA	NA
cg14023999	3.68391e-11	0.00593797	0.588299	chr15	90543224			NA	NA
cg24044763	3.70028e-11	0.00146839	0.954014	chr1	160370683	VANGL2	5'UTR	NA	NA
cg20864214	3.73337e-11	0.00982455	0.278037	chr11	73054121	ARHGEF17	Body	NA	NA
cg09296536	3.80346e-11	0.00364084	0.794873	chr2	40392494	SLC8A1;SLC8A1;SLC8A1;SLC8A1	Body;Body;Body;Body	NA	NA
cg03463641	3.88954e-11	0.00168188	0.730936	chr2	25565497	DNMT3A;DNMT3A;DNMT3A	TSS1500;TSS200;TSS200	NA	NA
cg07087557	3.9437e-11	0.00150937	0.411518	chr1	227128210	CABC1	5'UTR	NA	NA
cg17615115	3.94427e-11	-0.00534919	0.122002	chr17	60905352			NA	NA
cg27649295	4.06704e-11	0.00188024	0.586379	chr6	124125227	NKAIN2;NKAIN2	5'UTR;1stExon	NA	NA
cg04952324	4.08678e-11	-0.00602763	0.0910269	chr7	73727108	CLIP2;CLIP2	5'UTR;5'UTR	NA	NA
cg23780514	4.10304e-11	0.00159311	0.67059	chr18	71959249	CYB5A;CYB5A	TSS200;TSS200	NA	NA
cg23863881	4.11451e-11	0.00142703	0.208624	chr19	17622413	PGLS	TSS200	NA	NA
cg18949794	4.14948e-11	0.00509376	0.95405	chr7	130123340			NA	NA
cg24498885	4.17399e-11	-0.00599211	0.71116	chr13	45770307	KCTD4;GTF2F2	5'UTR;Body	NA	NA
cg05204193	4.17924e-11	-0.0065723	0.485591	chrX	30904380	MAP3K7IP3	5'UTR	NA	NA
cg08745334	4.19696e-11	-0.0054408	0.816969	chr4	1754069			-5.76	1.3e-08
cg08351536	4.24423e-11	0.00463736	0.347425	chr17	60885250	MARCH10;MARCH10	5'UTR;TSS1500	NA	NA
cg05087455	4.25012e-11	-0.00397348	0.151379	chr2	7171869	RNF144A	Body	NA	NA
cg05985317	4.28816e-11	0.00379204	0.920228	chr6	32118208	PRRT1	Body	NA	NA
cg04453124	4.34495e-11	0.00634451	0.699693	chr10	79596240	DLG5	Body	NA	NA
cg16045390	4.37415e-11	0.0043136	0.908137	chr17	37896620	GRB7;GRB7	5'UTR;5'UTR	NA	NA
cg25049733	4.38331e-11	0.00593742	0.0493521	chr6	1987269	GMDS	Body	NA	NA
cg05358900	4.47901e-11	0.00588579	0.785675	chr12	32553295			NA	NA
cg18462381	4.53369e-11	0.00397007	0.187762	chr10	129536718	FOXI2	Body	NA	NA
cg19816107	4.53489e-11	0.00144908	0.956787	chr7	33101939	NT5C3;NT5C3	Body;Body	NA	NA
cg02876145	4.54794e-11	0.00173996	0.625555	chr14	100842825	WARS;WARS;WDR25;WDR25;WDR25;WARS;WARS	TSS200;TSS1500;TSS200;1stExon;5'UTR;TSS200;TSS1500	NA	NA
cg12695465	4.57116e-11	0.0109901	0.425212	chr6	10556147	GCNT2;GCNT2;GCNT2	5'UTR;1stExon;Body	NA	NA
cg27106204	4.5815e-11	0.00736594	0.0215231	chr7	40905203			NA	NA
cg10377921	4.59571e-11	-0.00388729	0.107209	chr19	15391946	BRD4;BRD4	TSS1500;TSS1500	NA	NA
cg16310095	4.59898e-11	0.00350282	0.476618	chr1	155952959			NA	NA
cg06067425	4.60253e-11	0.00536103	0.709332	chr4	141418804			NA	NA
cg23415489	4.62229e-11	0.00160826	0.459557	chr3	47324472	KIF9;KIF9;KIF9;KLHL18	TSS200;TSS200;TSS200;1stExon	NA	NA
cg08854834	4.67845e-11	-0.00479985	0.709911	chr21	30517941	C21orf7	Body	NA	NA
cg26525025	4.68275e-11	0.00321402	0.283973	chr12	52521183			NA	NA
cg21363348	4.68913e-11	-0.00348159	0.830581	chr7	134832221	TMEM140	TSS1500	NA	NA
cg26897054	4.69883e-11	0.0012672	0.698625	chr19	42721870	DEDD2	TSS200	NA	NA
cg19793598	4.719e-11	0.00538758	0.603099	chr3	133615597	RAB6B	TSS1500	NA	NA
cg24265280	4.94013e-11	0.00194031	0.830098	chr6	154832000	CNKSR3	TSS1500	NA	NA
cg10905180	4.94984e-11	-0.00878127	0.359646	chr11	4701824	OR51E2	3'UTR	NA	NA
cg23679982	4.98743e-11	-0.00731014	0.162599	chr17	1686737	SMYD4	Body	NA	NA
cg13027206	5.01216e-11	-0.00428082	0.108032	chr14	91866325	CCDC88C	Body	-6.27	6.2e-10
cg13601957	5.01376e-11	0.00420226	0.495955	chr8	60218373			NA	NA
cg25533220	5.01531e-11	0.00128537	0.465952	chr19	2328480	SPPL2B;LSM7;SPPL2B	TSS200;Body;TSS200	NA	NA
cg26188726	5.0554e-11	0.0063499	0.716518	chr16	31225957	TRIM72	5'UTR	NA	NA
cg14535006	5.07846e-11	0.00121756	0.828339	chr20	18448030	C20orf12;POLR3F	TSS1500;TSS200	NA	NA
cg27554769	5.10749e-11	0.00139433	0.585647	chr1	202896170	KLHL12	5'UTR	NA	NA
cg07157107	5.11272e-11	-0.00564739	0.523984	chr8	42623730	CHRNA6	TSS200	NA	NA
cg26750893	5.13339e-11	0.00529502	0.787403	chr2	38043481			NA	NA
cg23409168	5.2297e-11	0.00656632	0.0236001	chr8	117101690			NA	NA
cg23610447	5.23627e-11	-0.00539385	0.488475	chr6	113650073			NA	NA
cg13912311	5.26573e-11	0.00742743	0.506372	chr9	127265348	NR5A1	Body	NA	NA
cg25425537	5.29562e-11	0.00847854	0.761755	chr2	6910518			NA	NA
cg04473902	5.35179e-11	0.00498608	0.156496	chr12	14721288	PLBD1	TSS1500	NA	NA
cg16459182	5.39715e-11	0.00129016	0.999178	chr12	50236606	BCDIN3D	Body	NA	NA
cg16963852	5.48201e-11	-0.00652003	0.21315	chr3	150479084	SIAH2	Body	NA	NA
cg00232483	5.4904e-11	0.00371213	0.466745	chr16	19849514	IQCK	Body	NA	NA
cg05840541	5.50968e-11	-0.00538881	0.754536	chr22	50482925	TTLL8	Body	NA	NA
cg13276306	5.53489e-11	0.00485008	0.64078	chr8	108344200	ANGPT1	Body	NA	NA
cg12424598	5.53584e-11	-0.0044205	0.37545	chr1	151788227	RORC;RORC	Body;Body	NA	NA
cg21488617	5.58324e-11	0.00463457	0.981277	chr1	38022586	DNALI1	1stExon	NA	NA
cg08551248	5.59566e-11	0.00182642	0.594871	chr1	40255129	BMP8B	TSS1500	NA	NA
cg01185080	5.60116e-11	0.00480869	0.926134	chr15	90543813	ZNF710	TSS1500	NA	NA
cg16137564	5.61221e-11	-0.00556084	0.652823	chr14	89024217			NA	NA
cg00497630	5.62124e-11	0.00144489	0.586604	chr17	26733052	SLC46A1	1stExon	NA	NA
cg18143792	5.67875e-11	0.0058416	0.278576	chr1	26250290			NA	NA
cg17819250	5.68026e-11	0.00576036	0.0871623	chr8	36380237			NA	NA
cg12646642	5.69954e-11	0.00135695	0.661079	chr1	44440766	ATP6V0B;ATP6V0B;ATP6V0B	5'UTR;1stExon;1stExon	NA	NA
cg13772414	5.73211e-11	0.00479466	0.839778	chr2	222383060	EPHA4	Body	NA	NA
cg13896106	5.74099e-11	-0.00479948	0.15989	chr17	72754589	SLC9A3R1	Body	NA	NA
cg03418876	5.78428e-11	-0.00645291	0.550539	chr17	48799340	LUC7L3;LUC7L3	Body;Body	NA	NA
cg25144135	5.81299e-11	-0.00534768	0.887569	chr1	1144012			NA	NA
cg04813911	5.82069e-11	-0.00348575	0.123851	chr15	65503889	CILP	TSS200	NA	NA
cg11064797	5.82386e-11	0.00140346	0.792612	chr5	141016628	RELL2;RELL2;RELL2;HDAC3;RELL2	1stExon;5'UTR;1stExon;TSS1500;5'UTR	NA	NA
cg19764555	5.83792e-11	0.0042153	0.241102	chr11	62315119	AHNAK;AHNAK	TSS1500;TSS1500	NA	NA
cg18328933	5.86707e-11	-0.00454169	0.432492	chr3	52008538	ABHD14B;ABHD14B;ABHD14B;ABHD14A;ABHD14B;ABHD14B	1stExon;Body;5'UTR;TSS1500;1stExon;5'UTR	NA	NA
cg06271067	5.92182e-11	-0.00751705	0.857244	chr2	225384862	CUL3	Body	NA	NA
cg18518916	5.96777e-11	-0.00355335	0.793202	chr4	185456125			NA	NA
cg17353337	5.98485e-11	0.0056681	0.501788	chr6	138866898	NHSL1	Body	NA	NA
cg02532488	6.06312e-11	0.00145674	0.768776	chr11	65343341	EHBP1L1	TSS200	NA	NA
cg00230074	6.07666e-11	0.00340483	0.09256	chr17	72358042	BTBD17	TSS200	NA	NA
cg25205758	6.09223e-11	0.00170108	0.317439	chr6	144385672	PLAGL1;PLAGL1;PLAGL1;PLAGL1	1stExon;5'UTR;1stExon;5'UTR	NA	NA
cg10022533	6.10915e-11	-0.00599388	0.502723	chr1	236723124	HEATR1	Body	NA	NA
cg17298925	6.13121e-11	-0.0121263	0.713483	chr5	6828054			NA	NA
cg16448636	6.13684e-11	0.00572098	0.690648	chr7	21209509			NA	NA
cg07175580	6.15e-11	0.0047138	0.82802	chr1	206971605	IL19	TSS1500	NA	NA
cg21369679	6.19192e-11	0.00124641	0.917058	chr16	47007757	DNAJA2	TSS200	NA	NA
cg18147098	6.24343e-11	0.00861193	0.56755	chr1	212688916			5.4	9.2e-08
cg06561216	6.32365e-11	0.00146251	0.456112	chr7	44925251	PURB	TSS1500	NA	NA
cg19759478	6.37842e-11	0.00490002	0.29477	chr1	112291876	C1orf183	Body	5.54	4.3e-08
cg14755009	6.40533e-11	0.00143909	0.693885	chr11	126153305	TIRAP;TIRAP	5'UTR;5'UTR	NA	NA
cg05886811	6.44949e-11	0.00432628	0.468246	chr6	17280740	RBM24	TSS1500	NA	NA
cg13660719	6.48758e-11	0.00459194	0.230543	chr6	30852963	DDR1;DDR1	5'UTR;5'UTR	NA	NA
cg07667560	6.50252e-11	-0.00743042	0.677875	chr19	42637805	POU2F2	TSS1500	NA	NA
cg18688599	6.50424e-11	0.00133416	0.857297	chr5	10353401	2006-03-01	TSS1500	NA	NA
cg26052635	6.52202e-11	-0.00706958	0.909923	chr2	29339307	CLIP4	5'UTR	NA	NA
cg24497897	6.56333e-11	0.00149881	0.274617	chr11	65658826	CCDC85B	1stExon	NA	NA
cg12690119	6.57025e-11	-0.00549763	0.545545	chr3	141043080	ZBTB38;ZBTB38	1stExon;5'UTR	NA	NA
cg25960854	6.62027e-11	-0.00730098	0.432933	chr19	1160184	SBNO2	5'UTR	NA	NA
cg16060369	6.67033e-11	0.00657402	0.761896	chr10	43698834	RASGEF1A	Body	NA	NA
cg18290775	6.72184e-11	0.00579847	0.25365	chr14	69954135	FLJ44817	Body	NA	NA
cg25938530	6.7422e-11	-0.0105418	0.0441591	chr3	52812367	ITIH1;ITIH1	TSS200;Body	-5.97	3.7e-09
cg18805457	6.8035e-11	-0.00524183	0.749516	chr5	145829759	TCERG1;TCERG1	Body;Body	NA	NA
cg10938046	6.8593e-11	0.00613212	0.526989	chr6	43969577	C6orf223	Body	NA	NA
cg06449094	6.86298e-11	-0.0053161	0.924604	chr11	822397	PNPLA2	Body	NA	NA
cg20075683	6.87508e-11	0.00552436	0.0350511	chr5	132083910	CCNI2	Body	NA	NA
cg26581729	6.93721e-11	-0.00525743	0.535575	chr9	139939792	NPDC1	Body	NA	NA
cg26966384	7.00215e-11	0.00137599	0.751881	chr9	36190885	CLTA;CLTA;CLTA	TSS200;TSS200;TSS200	NA	NA
cg09697999	7.02157e-11	0.0102074	0.98492	chr7	733198	PRKAR1B;PRKAR1B;PRKAR1B;PRKAR1B;PRKAR1B;PRKAR1B	Body;Body;Body;Body;Body;Body	NA	NA
cg13747794	7.04265e-11	0.00122787	0.749385	chr15	78557094	DNAJA4;DNAJA4;DNAJA4;DNAJA4	TSS1500;Body;5'UTR;1stExon	NA	NA
cg15186869	7.05066e-11	0.00150281	0.725515	chr14	93673274	UBR7;UBR7;C14orf142	TSS200;TSS200;1stExon	NA	NA
cg06574296	7.06218e-11	-0.0136795	0.805287	chr2	239007919	ESPNL;SCLY	TSS1500;3'UTR	NA	NA
cg02123534	7.07834e-11	-0.00664888	0.495009	chr7	965485	ADAP1	Body	NA	NA
cg14319451	7.11003e-11	0.0049348	0.652122	chr11	63685777	RCOR2	TSS1500	NA	NA
cg24218077	7.13457e-11	0.00160617	0.392432	chr11	125495856	CHEK1;CHEK1;CHEK1;CHEK1;CHEK1	TSS1500;1stExon;5'UTR;5'UTR;1stExon	NA	NA
cg00803638	7.14808e-11	0.00388999	0.910348	chr6	35464304	TEAD3	5'UTR	NA	NA
cg07739604	7.16134e-11	0.00138532	0.318149	chr12	124950990	NCOR2;NCOR2	Body;Body	NA	NA
cg26363759	7.18531e-11	-0.0117743	0.422221	chr1	9377984	SPSB1	5'UTR	NA	NA
cg17105139	7.1931e-11	0.00595065	0.308411	chr2	74729279	LOC151534;LBX2	TSS1500;Body	NA	NA
cg19029445	7.22044e-11	0.00804536	0.456991	chr17	907732	ABR;ABR;ABR	3'UTR;3'UTR;3'UTR	NA	NA
cg25197194	7.45197e-11	-0.00741477	0.792037	chr3	128758787	CCDC48	3'UTR	-5.47	6.2e-08
cg15416442	7.50366e-11	0.00422838	0.197889	chr14	59244557			NA	NA
cg13099892	7.51589e-11	0.0036002	0.531502	chr4	174013995			NA	NA
cg00097536	7.52948e-11	0.00157166	0.512107	chr2	43454476	ZFP36L2;LOC100129726	TSS1500;Body	NA	NA
cg02706110	7.5854e-11	0.00143653	0.272124	chr22	24552132	CABIN1	Body	NA	NA
cg20345948	7.65563e-11	0.00460777	0.178955	chr4	2464014			NA	NA
cg19103704	7.68295e-11	-0.00407887	0.0858807	chr19	40440963	FCGBP	TSS1500	NA	NA
cg15540623	7.73003e-11	-0.00697513	0.728985	chr12	52388221	ACVR1B	3'UTR	NA	NA
cg08086221	7.83259e-11	0.00119581	0.669175	chr19	48112482	GLTSCR1	5'UTR	NA	NA
cg27392771	7.83468e-11	0.00422709	0.733356	chr19	13125851	NFIX	Body	NA	NA
cg14999189	7.84477e-11	-0.00518826	0.536217	chr17	2908369	RAP1GAP2;RAP1GAP2	Body;Body	NA	NA
cg22783262	8.02788e-11	0.0015395	0.233485	chr22	45098346	PRR5-ARHGAP8;PRR5;PRR5;PRR5;PRR5;PRR5;PRR5	TSS200;5'UTR;5'UTR;5'UTR;5'UTR;5'UTR;1stExon	NA	NA
cg16416152	8.06921e-11	0.00171494	0.775154	chr16	67193901	FBXL8;TRADD;FBXL8	1stExon;TSS200;5'UTR	NA	NA
cg01130991	8.33869e-11	0.00613674	0.632962	chr17	46510392			NA	NA
cg11020853	8.34925e-11	0.00413635	0.394036	chr3	43020564	FAM198A	TSS200	NA	NA
cg05017199	8.3647e-11	0.00463668	0.138051	chr7	150497065	TMEM176B;TMEM176B;TMEM176A;TMEM176B;TMEM176B;TMEM176B	TSS1500;5'UTR;TSS1500;5'UTR;5'UTR;5'UTR	5.97	3.8e-09
cg08417338	8.48795e-11	0.00157547	0.742794	chr15	43663582	ZSCAN29;TUBGCP4	TSS1500;1stExon	NA	NA
cg02264407	8.62751e-11	0.00510077	0.435704	chr13	76430665	LMO7;LMO7	Body;Body	NA	NA
cg03460756	8.64627e-11	0.00557325	0.363341	chr17	45353128	ITGB3	Body	NA	NA
cg09616559	8.67107e-11	0.00450818	0.689355	chr2	25921151			NA	NA
cg10517535	8.70394e-11	0.00657146	0.539692	chr17	9929698	GAS7;GAS7;GAS7	Body;Body;TSS200	NA	NA
cg11261958	8.75122e-11	-0.00451245	0.110423	chr3	118958539	B4GALT4;B4GALT4	5'UTR;5'UTR	NA	NA
cg07206725	8.79111e-11	0.00124787	0.426495	chr5	133702808	CDKL3;CDKL3	TSS200;TSS200	NA	NA
cg04249586	8.836e-11	0.00137705	0.621188	chr4	111119946	ELOVL6;ELOVL6	TSS200;TSS200	NA	NA
cg04348643	8.92389e-11	0.00458817	0.688842	chr3	153572883			NA	NA
cg08100497	8.94594e-11	0.00168394	0.949399	chr5	139422525	NRG2;NRG2;NRG2;NRG2	1stExon;1stExon;1stExon;1stExon	NA	NA
cg23887948	8.95441e-11	0.00784043	0.833575	chr15	74494854	STRA6;STRA6;STRA6;STRA6;STRA6	5'UTR;5'UTR;5'UTR;5'UTR;5'UTR	NA	NA
cg06991495	8.96965e-11	0.00437929	0.0117596	chr22	38714466	CSNK1E;CSNK1E	TSS1500;TSS1500	NA	NA
cg03614189	8.97307e-11	0.00125673	0.569723	chr8	82598326	IMPA1;IMPA1;IMPA1	5'UTR;5'UTR;5'UTR	NA	NA
cg27299047	8.99911e-11	-0.00474095	0.621876	chr7	2103248	MAD1L1;MAD1L1;MAD1L1	Body;Body;Body	NA	NA
cg08274637	9.06563e-11	0.00773504	0.820936	chr13	51417923	DLEU7	TSS200	NA	NA
cg12924588	9.08695e-11	0.00141371	0.661292	chr2	68694517	APLF;FBXO48	TSS200;TSS200	NA	NA
cg00931181	9.10157e-11	0.00788802	0.517572	chr2	6910631			NA	NA
cg13160963	9.20144e-11	0.00134817	0.589601	chr6	11538582	TMEM170B	1stExon	NA	NA
cg13422817	9.23404e-11	0.00420579	0.851565	chr12	4550927	FGF6	Body	NA	NA
cg02980249	9.26294e-11	-0.00592934	0.00682297	chr6	31760762	VARS	Body	NA	NA
cg06859463	9.27975e-11	0.00410772	0.363496	chr11	46300215	CREB3L1	Body	NA	NA
cg18200741	9.27995e-11	0.00419857	0.298877	chr2	33780366	RASGRP3;RASGRP3;RASGRP3	Body;Body;Body	NA	NA
cg03028337	9.36302e-11	0.00590637	0.859912	chr2	56410087	CCDC85A	TSS1500	NA	NA
cg21937377	9.49574e-11	-0.00733142	0.272952	chr3	194868750	C3orf21	Body	NA	NA
cg07262247	9.56703e-11	0.00548394	0.968192	chr5	131593730	PDLIM4;PDLIM4	Body;Body	NA	NA
cg10861146	9.66357e-11	0.00242866	0.204117	chr1	155099324	EFNA1;EFNA1	TSS1500;TSS1500	NA	NA
cg13167816	9.75331e-11	-0.00417171	0.234499	chr14	24601808	FITM1	Body	NA	NA
cg04483863	9.79219e-11	0.00557812	0.621716	chr5	173171737			NA	NA
cg02879960	9.89197e-11	-0.00648401	0.902583	chr22	50483545	TTLL8	Body	NA	NA
cg01184449	9.92658e-11	0.00491436	0.746883	chr2	42396170	EML4;EML4	TSS1500;TSS1500	NA	NA
cg24062472	9.97551e-11	0.00113945	0.643124	chr9	100818849	NANS	TSS200	NA	NA
cg25153824	1.01156e-10	0.0046642	0.255634	chr1	159870077	CCDC19	TSS200	NA	NA
cg15540144	1.01396e-10	0.00151633	0.848548	chr2	99553141	C2orf55	TSS1500	NA	NA
cg04873053	1.01884e-10	0.0039458	0.135927	chr1	53935918			NA	NA
cg01000831	1.02083e-10	0.00180076	0.861567	chr10	73156460	CDH23;CDH23	TSS1500;TSS1500	NA	NA
cg18162477	1.02397e-10	0.00158274	0.930882	chr1	24969428	SRRM1	TSS200	NA	NA
cg04357965	1.02477e-10	0.00648642	0.338017	chr5	77945347	LHFPL2	TSS1500	NA	NA
cg22138096	1.04389e-10	0.00511972	0.717727	chr7	41772439	LOC285954	Body	NA	NA
cg26380291	1.04739e-10	0.00382971	0.450902	chr10	114787843	TCF7L2;TCF7L2;TCF7L2;TCF7L2;TCF7L2;TCF7L2	Body;Body;Body;Body;Body;Body	NA	NA
cg19824006	1.05958e-10	0.00515408	0.436628	chr2	200718119			NA	NA
cg09523086	1.06178e-10	0.00160061	0.379219	chr21	33984856	C21orf59	TSS200	NA	NA
cg01252023	1.06595e-10	-0.00407532	0.909124	chr11	67207574	CORO1B;CORO1B	Body;Body	NA	NA
cg07129696	1.0666e-10	0.0015772	0.0493105	chr2	209119949	IDH1	TSS200	NA	NA
cg22926842	1.06948e-10	-0.00462836	0.0841451	chr22	42336869	CENPM;CENPM;CENPM	TSS1500;Body;Body	NA	NA
cg11953775	1.07646e-10	0.00528819	0.518271	chr1	207597011			NA	NA
cg06536333	1.08311e-10	0.00169351	0.627574	chr6	41339977			NA	NA
cg16824126	1.08478e-10	-0.00572594	0.648056	chr22	41626394	CHADL;L3MBTL2	Body;3'UTR	NA	NA
cg03110921	1.10113e-10	0.00568776	0.455256	chr10	79597461	DLG5	Body	NA	NA
cg01586524	1.12815e-10	0.00147605	0.959605	chr8	67341819	RRS1	1stExon	NA	NA
cg14223001	1.14499e-10	0.0128334	0.286336	chr11	44978881			NA	NA
cg18714585	1.14925e-10	0.00135538	0.706422	chr12	123868665	SETD8	TSS200	NA	NA
cg09360974	1.15723e-10	0.00371423	0.538871	chr11	66496490			NA	NA
cg02056062	1.18616e-10	0.00437096	0.957776	chr3	149374914	WWTR1;WWTR1;WWTR1	Body;Body;Body	NA	NA
cg09430689	1.18626e-10	0.00133142	0.588405	chr14	76127296	C14orf1;C14orf1;TTLL5	1stExon;5'UTR;TSS1500	NA	NA
cg10394788	1.19156e-10	0.00495106	0.56169	chr9	124360547	DAB2IP	Body	NA	NA
cg10665199	1.20907e-10	0.0033275	0.403382	chr7	133106180	EXOC4;EXOC4	Body;Body	NA	NA
cg16205352	1.21079e-10	0.0058896	0.653426	chr12	49688176	PRPH	TSS1500	NA	NA
cg10783149	1.22241e-10	0.00643007	0.102763	chr14	55707866			NA	NA
cg08049553	1.22932e-10	0.00135153	0.703413	chr17	73257843	MRPS7;MRPS7;GGA3;GGA3	1stExon;5'UTR;TSS200;TSS200	NA	NA
cg01243072	1.23147e-10	-0.00626388	0.815968	chr2	43398171			NA	NA
cg22573917	1.23453e-10	0.00143597	0.295557	chr12	49371628	WNT1	TSS1500	NA	NA
cg06219995	1.23865e-10	0.00374325	0.344072	chr1	16374768	CLCNKB;CLCNKB	TSS1500;Body	NA	NA
cg04738379	1.24596e-10	0.00156894	0.993369	chr15	81282102	MESDC2	1stExon	NA	NA
cg08302713	1.24839e-10	0.00161645	0.249085	chr6	53409850	GCLC	TSS200	NA	NA
cg18789261	1.25846e-10	0.00147111	0.931936	chr12	82752393	C12orf26;CCDC59;CCDC59	1stExon;Body;TSS200	NA	NA
cg08640466	1.25943e-10	0.0048551	0.316166	chr6	35153213			NA	NA
cg23091302	1.27498e-10	-0.0059962	0.0497218	chr3	19389409	KCNH8	Body	NA	NA
cg06962918	1.27608e-10	0.00608197	0.179369	chr7	18127112			NA	NA
cg19000349	1.2764e-10	0.00140942	0.153297	chr2	75061841	HK2	Body	NA	NA
cg10147507	1.28044e-10	0.00427293	0.57748	chr3	57113767	ARHGEF3	TSS1500	NA	NA
cg13692902	1.30899e-10	0.00135696	0.0700022	chr5	34915868	BRIX1;RAD1;RAD1	1stExon;TSS200;TSS200	NA	NA
cg03371384	1.31208e-10	0.00556176	0.88666	chr11	69260271			NA	NA
cg25149551	1.32487e-10	0.00274365	0.519055	chr1	156897062	C1orf92	Body	NA	NA
cg15165154	1.32654e-10	-0.00724681	0.193021	chr5	139041014	CXXC5	5'UTR	NA	NA
cg25287071	1.32781e-10	-0.00650969	0.241281	chr1	226878419	ITPKB	Body	NA	NA
cg21422361	1.32992e-10	-0.00724156	0.964648	chr7	1884392	MAD1L1;MAD1L1;MAD1L1	Body;Body;Body	NA	NA
cg05871607	1.33663e-10	0.00152729	0.819613	chr1	28241317	RPA2	TSS200	NA	NA
cg12991385	1.34104e-10	0.00672886	0.0258408	chr6	29599259	GABBR1;GABBR1	Body;Body	NA	NA
cg01824466	1.34388e-10	-0.0068911	0.736255	chr8	95959531	TP53INP1;TP53INP1	5'UTR;5'UTR	NA	NA
cg04050119	1.34897e-10	0.00152098	0.829409	chr17	79819298	P4HB	TSS1500	NA	NA
cg02215171	1.35209e-10	0.00419467	0.939745	chr4	89379156	HERC5	Body	NA	NA
cg14565151	1.36124e-10	0.00561916	0.530304	chr12	95945384	USP44	TSS200	NA	NA
cg20250874	1.3682e-10	0.00145159	0.945947	chr13	47127354	LRCH1;LRCH1;LRCH1;LRCH1;LRCH1;LRCH1	5'UTR;1stExon;5'UTR;1stExon;1stExon;5'UTR	NA	NA
cg04627240	1.38046e-10	0.00149068	0.85583	chr19	42746847	GSK3A	TSS200	NA	NA
cg14941466	1.38468e-10	0.00137585	0.953838	chr18	66382226	CCDC102B;TMX3;TMX3	TSS1500;1stExon;5'UTR	NA	NA
cg08733960	1.38881e-10	0.00152746	0.332724	chr6	52529248	LOC730101;LOC730101	Body;Body	NA	NA
cg16483490	1.3931e-10	0.00147516	0.844951	chr2	111879711	BCL2L11;BCL2L11;BCL2L11	5'UTR;5'UTR;5'UTR	NA	NA
cg23188579	1.40968e-10	-0.00509898	0.162622	chr4	141264558	SCOC;SCOC;SCOC;SCOC;SCOC	TSS200;5'UTR;TSS200;TSS200;TSS200	NA	NA
cg10853063	1.42323e-10	0.00132211	0.651816	chr12	120315422	CIT	TSS1500	NA	NA
cg14619949	1.43485e-10	-0.00749433	0.348134	chr5	76116169	F2RL1	Body	NA	NA
cg06362796	1.43981e-10	0.0015175	0.255437	chr12	132196343	SFRS8	Body	NA	NA
cg21222426	1.45573e-10	-0.006829	0.774091	chr9	20339790			NA	NA
cg15677497	1.45624e-10	0.00139475	0.538844	chr6	30585191	MRPS18B;PPP1R10	TSS1500;TSS200	NA	NA
cg11824191	1.46031e-10	0.00485547	0.313264	chr1	183274124	NMNAT2;NMNAT2	TSS200;Body	NA	NA
cg12843872	1.46484e-10	0.00167227	0.565415	chr7	90894352	FZD1	1stExon	NA	NA
cg08335767	1.46934e-10	0.00300045	0.196137	chr6	34206495	HMGA1;HMGA1;HMGA1;HMGA1;HMGA1;HMGA1	5'UTR;5'UTR;5'UTR;5'UTR;5'UTR;TSS200	NA	NA
cg26915329	1.47586e-10	0.00479059	0.983504	chr13	60033345			NA	NA
cg02691192	1.47642e-10	-0.00598326	0.690564	chr17	59693501			NA	NA
cg10089014	1.4775e-10	0.00142152	0.782989	chr14	59950484	C14orf149;JKAMP;JKAMP	Body;TSS1500;TSS1500	NA	NA
cg14640466	1.48854e-10	-0.0066273	0.738182	chr8	135056370			NA	NA
cg09555736	1.48958e-10	-0.00599278	0.422537	chr16	474271	RAB11FIP3	TSS1500	NA	NA
cg11632438	1.49664e-10	0.00574272	0.21643	chr3	158519176	MFSD1;MFSD1	TSS1500;TSS1500	NA	NA
cg19734190	1.50279e-10	-0.00641553	0.322676	chr4	6993556	TBC1D14;TBC1D14;TBC1D14	Body;Body;Body	NA	NA
cg18089145	1.5177e-10	0.00127801	0.774445	chr14	39572493	SEC23A	TSS200	NA	NA
cg16776035	1.53642e-10	-0.00428134	0.312908	chr17	74542680			NA	NA
cg16192203	1.53679e-10	0.00131016	0.366696	chr3	119217218	C3orf1	TSS200	NA	NA
cg23786152	1.54349e-10	0.00534535	0.48531	chr10	105610562	SH3PXD2A	Body	NA	NA
cg26749414	1.5459e-10	0.0146374	0.521933	chr19	46807272	HIF3A;HIF3A;HIF3A	5'UTR;Body;Body	NA	NA
cg16449186	1.546e-10	0.00147134	0.850465	chr3	186545470			NA	NA
cg17230773	1.55029e-10	-0.00839486	0.101646	chr7	142494148			NA	NA
cg19875532	1.55283e-10	0.00509391	0.610531	chr10	135052004	VENTX	Body	NA	NA
cg11573518	1.55573e-10	-0.00442775	0.732965	chr7	73721031	CLIP2;CLIP2	5'UTR;5'UTR	NA	NA
cg09113483	1.55896e-10	0.00967512	0.857781	chr1	61517807			NA	NA
cg02535219	1.5865e-10	-0.00428744	0.553989	chr16	11876908	ZC3H7A	TSS1500	NA	NA
cg15065896	1.59901e-10	0.00114768	0.823347	chr3	37285038	GOLGA4;GOLGA4	5'UTR;1stExon	NA	NA
cg05898524	1.60617e-10	0.00466268	0.605488	chr1	156083276	LMNA;LMNA;LMNA	TSS1500;TSS1500;TSS1500	NA	NA
cg02896465	1.61098e-10	0.00140021	0.818992	chr19	11485452	C19orf39	1stExon	NA	NA
cg06241374	1.61458e-10	0.0065345	0.305308	chr2	56410071	CCDC85A	TSS1500	NA	NA
cg25398580	1.61586e-10	0.00122739	0.83098	chr12	88536147	TMTC3;TMTC3;CEP290	1stExon;5'UTR;TSS200	NA	NA
cg10198479	1.63142e-10	0.00702104	0.703049	chr16	85268435			NA	NA
cg12001357	1.64385e-10	-0.00515321	0.401706	chr2	233410852	CHRNG	3'UTR	NA	NA
cg12127149	1.66272e-10	-0.00450033	0.320003	chr14	102487020	DYNC1H1	Body	NA	NA
cg01807919	1.66403e-10	0.00143659	0.748558	chr17	7518403	SHBG;FXR2	Body;TSS200	NA	NA
cg02326058	1.6719e-10	-0.00715213	0.670309	chr8	8993102			NA	NA
cg11775492	1.68588e-10	0.00146761	0.907917	chr12	51158663	ATF1	5'UTR	NA	NA
cg22936253	1.687e-10	-0.00723341	0.86194	chr10	90752569	FAS;FAS;FAS;FAS;ACTA2;FAS;FAS;FAS	Body;Body;Body;Body;TSS1500;Body;Body;Body	NA	NA
cg26890706	1.69195e-10	0.00577152	0.275579	chr6	13924425	RNF182;RNF182;RNF182;RNF182	TSS1500;TSS1500;TSS1500;TSS1500	NA	NA
cg05969148	1.69241e-10	0.00148672	0.967107	chr19	51307846	C19orf48;C19orf48;C19orf48;C19orf48	1stExon;5'UTR;1stExon;5'UTR	NA	NA
cg10712623	1.71473e-10	0.00178937	0.535117	chr3	25469577	RARB;RARB	TSS1500;TSS200	NA	NA
cg11739399	1.71975e-10	0.00398772	0.873723	chr1	206669785	IKBKE	3'UTR	NA	NA
cg07075930	1.72261e-10	0.0015849	0.497504	chr18	7567717	PTPRM;PTPRM;PTPRM;PTPRM	1stExon;1stExon;5'UTR;5'UTR	NA	NA
cg06550057	1.72341e-10	0.00159107	0.372851	chr2	200336200	FLJ32063	Body	NA	NA
cg16464704	1.73119e-10	0.00166595	0.776034	chr1	26249489			NA	NA
cg11810998	1.74105e-10	-0.00341566	0.0949067	chr1	212819593			NA	NA
cg18891387	1.74573e-10	0.00129607	0.577511	chr19	5903977	NDUFA11;VMAC;NDUFA11	1stExon;TSS1500;5'UTR	NA	NA
cg01312997	1.75206e-10	0.0015501	0.811543	chr2	128180646	PROC	Body	NA	NA
cg16481280	1.75589e-10	0.00669616	0.831293	chr6	32120955	PPT2;PRRT1;PPT2	TSS1500;TSS1500;TSS1500	NA	NA
cg05897316	1.757e-10	0.00283046	0.633785	chr3	40657497			NA	NA
cg09120934	1.75896e-10	0.00577503	0.549525	chr11	120187999	POU2F3	Body	NA	NA
cg19695978	1.77138e-10	0.00467703	0.69608	chr15	70877381			NA	NA
cg03803818	1.80081e-10	0.00407234	0.131369	chr12	110637414	IFT81;IFT81	Body;Body	NA	NA
cg04097131	1.81294e-10	-0.00642017	0.544328	chr6	15298461	JARID2	Body	NA	NA
cg00789034	1.85223e-10	0.00141824	0.581918	chr6	158245090	SNX9	Body	NA	NA
cg16310045	1.85789e-10	0.00399556	0.528598	chr10	114813758	TCF7L2;TCF7L2;TCF7L2;TCF7L2;TCF7L2;TCF7L2	Body;Body;Body;Body;Body;Body	NA	NA
cg00944421	1.86172e-10	0.00950382	0.613609	chr16	68269483	ESRP2	Body	NA	NA
cg13597554	1.88043e-10	-0.00613475	0.96248	chr15	49732282	FGF7;C15orf33	Body;Body	NA	NA
cg00032036	1.8858e-10	0.00146862	0.896583	chr19	7600417	PNPLA6;PNPLA6;PNPLA6;PNPLA6;PNPLA6	5'UTR;5'UTR;TSS200;5'UTR;5'UTR	NA	NA
cg05902173	1.88748e-10	0.00161655	0.473407	chr6	139013757			NA	NA
cg05294095	1.88943e-10	0.0013228	0.998787	chr19	38865080	PSMD8	TSS200	NA	NA
cg17494199	1.90903e-10	0.00592288	0.215177	chr13	106834942			NA	NA
cg15260428	1.90957e-10	-0.00482363	0.936734	chr12	132381902	ULK1	Body	NA	NA
cg05958910	1.91955e-10	0.00713732	0.284667	chr10	21796441			NA	NA
cg00501876	1.9266e-10	-0.00353502	0.935817	chr3	39193251	CSRNP1	5'UTR	NA	NA
cg10265365	1.93102e-10	0.00496041	0.449433	chr19	42827690	TMEM145	Body	NA	NA
cg24927135	1.93701e-10	0.00123511	0.0719603	chr15	63449340	RPS27L	Body	NA	NA
cg07352544	1.93893e-10	-0.0040331	0.538747	chr1	26126233	SEPN1;SEPN1	TSS1500;TSS1500	NA	NA
cg05544807	1.94825e-10	0.00488053	0.811304	chr2	25475916	DNMT3A;DNMT3A;DNMT3A	Body;TSS1500;Body	NA	NA
cg07503785	1.9514e-10	0.00560247	0.0516492	chr11	76033473			NA	NA
cg05976840	1.95785e-10	0.00529055	0.725337	chr16	67189804	TRADD	Body	NA	NA
cg26006084	1.98179e-10	0.00593713	0.136616	chr5	171616571	STK10	TSS1500	NA	NA
cg17091577	1.99233e-10	0.00637267	0.461959	chr6	30854233	DDR1;DDR1	5'UTR;5'UTR	NA	NA
cg13928490	1.99263e-10	-0.00806534	0.83891	chr13	51640442	GUCY1B2	TSS200	NA	NA
cg05258935	2.00126e-10	0.00857147	0.237894	chr19	39086923	MAP4K1;MAP4K1	Body;Body	NA	NA
cg26657240	2.00429e-10	-0.0088379	0.43956	chr15	81475061			NA	NA
cg07042014	2.00584e-10	-0.00403696	0.675838	chr14	24783620	LTB4R;LTB4R;LTB4R	5'UTR;5'UTR;1stExon	NA	NA
cg12217625	2.00769e-10	0.0082269	0.089574	chr1	159825628	VSIG8;C1orf204	Body;TSS1500	NA	NA
cg14129664	2.0085e-10	0.00163113	0.703973	chr19	42498319	ATP1A3;ATP1A3	5'UTR;1stExon	NA	NA
cg16470576	2.02735e-10	0.00130908	0.607721	chr5	175815543	NOP16;HIGD2A	TSS200;TSS1500	NA	NA
cg08497766	2.03698e-10	0.00136143	0.569008	chr10	6019877	IL15RA;IL15RA;IL15RA	TSS1500;5'UTR;1stExon	NA	NA
cg26850469	2.03782e-10	0.00387721	0.595249	chr3	53051694	SFMBT1;SFMBT1;SFMBT1	5'UTR;5'UTR;5'UTR	NA	NA
cg10799440	2.04369e-10	0.00506944	0.89775	chr8	120685686			NA	NA
cg00110832	2.0444e-10	0.00471467	0.606211	chr6	32121130	PPT2;PPT2;PRRT1	TSS200;TSS1500;TSS1500	NA	NA
cg01444716	2.04652e-10	-0.00852805	0.740266	chr20	11898557	BTBD3;BTBD3	5'UTR;TSS200	NA	NA
cg24939194	2.05731e-10	-0.00507027	0.476968	chr7	2563611	LFNG;LFNG;LFNG;LFNG	Body;Body;Body;Body	NA	NA
cg06000330	2.07231e-10	0.00550326	0.95139	chr7	19183231			NA	NA
cg14141380	2.07626e-10	0.00140448	0.790698	chr7	20826721	SP8;SP8	TSS1500;TSS1500	NA	NA
cg04691540	2.08284e-10	0.0016493	0.59285	chr1	179198414	ABL2;ABL2;ABL2;ABL2;ABL2	1stExon;1stExon;1stExon;1stExon;1stExon	NA	NA
cg05591701	2.0912e-10	-0.00624812	0.488553	chr6	30569211	PPP1R10	3'UTR	NA	NA
cg02438611	2.10005e-10	0.00658636	0.978919	chr17	55828107			NA	NA
cg00079023	2.10334e-10	0.00379578	0.637196	chr5	139492535	PURA	TSS1500	NA	NA
cg01708636	2.10541e-10	0.00504594	0.749061	chr4	166301085	CPE	Body	NA	NA
cg21273029	2.12413e-10	0.001376	0.0653251	chr6	149068556	UST;UST	1stExon;5'UTR	NA	NA
cg25155396	2.12685e-10	0.00129266	0.426069	chr6	7261525			NA	NA
cg18346576	2.13509e-10	0.00517107	0.239353	chr2	27938071			NA	NA
cg23512275	2.1357e-10	-0.00525282	0.580056	chr21	45232595	LOC284837	TSS200	NA	NA
cg16501436	2.14347e-10	0.00141515	0.883466	chr6	32821039	PSMB9;PSMB9;TAP1	TSS1500;TSS1500;1stExon	NA	NA
cg02739013	2.1562e-10	0.00268639	0.844279	chr4	114681314	CAMK2D;CAMK2D;CAMK2D;CAMK2D;CAMK2D;CAMK2D	Body;Body;Body;Body;Body;Body	NA	NA
cg00324693	2.158e-10	0.00171197	0.446731	chr20	2821357	FAM113A;VPS16;VPS16	TSS200;TSS200;TSS200	NA	NA
cg12113316	2.16859e-10	-0.0073542	0.336212	chr8	37729089	RAB11FIP1;RAB11FIP1;RAB11FIP1	Body;1stExon;Body	NA	NA
cg03634833	2.17513e-10	-0.00696416	0.909854	chr7	965534	ADAP1	Body	NA	NA
cg04348689	2.18905e-10	0.00558706	0.666883	chr14	93765993	BTBD7;BTBD7	5'UTR;5'UTR	NA	NA
cg27102629	2.20142e-10	0.00728189	0.792004	chr10	76573155			NA	NA
cg06525670	2.2086e-10	0.00431266	0.312605	chr13	30528708			NA	NA
cg03495688	2.22571e-10	0.00151516	0.546983	chr9	6007586	KIAA2026	1stExon	NA	NA
cg12784049	2.23902e-10	0.00156062	0.139922	chr10	103893589	PPRC1	Body	NA	NA
cg23288818	2.24019e-10	0.00145506	0.59251	chr1	21671570	ECE1	Body	NA	NA
cg04876424	2.24169e-10	0.00494852	0.82333	chr6	17280551	RBM24	TSS1500	NA	NA
cg09569432	2.24838e-10	0.00138391	0.145699	chr19	39826668	GMFG;GMFG	5'UTR;1stExon	NA	NA
cg21092177	2.27754e-10	0.00120426	0.965533	chr17	73128031	NT5C	TSS200	NA	NA
cg05475386	2.28258e-10	-0.00574118	0.0745496	chr12	65723693	MSRB3;MSRB3	Body;Body	NA	NA
cg11033273	2.29126e-10	0.00327316	0.575161	chr11	35966115	LDLRAD3	Body	NA	NA
cg07256006	2.29155e-10	0.00153803	0.690982	chr1	156182774	PMF1	TSS200	NA	NA
cg19760965	2.31991e-10	-0.0106286	0.432396	chr3	194868843	C3orf21	Body	NA	NA
cg26915799	2.33239e-10	-0.00623655	0.295826	chr1	201852272	IPO9	3'UTR	NA	NA
cg20019356	2.34494e-10	0.00535873	0.193706	chr14	64764216	ESR2	5'UTR	NA	NA
cg00541544	2.34795e-10	-0.00581477	0.368582	chr22	39150255	UNC84B	5'UTR	NA	NA
cg02835964	2.35066e-10	0.00479663	0.152278	chr9	127265171	NR5A1	Body	NA	NA
cg11043990	2.35213e-10	0.00301161	0.699909	chr17	74235759	RNF157	Body	NA	NA
cg14034325	2.35578e-10	0.00546441	0.489619	chr10	43891459	HNRNPF;HNRNPF;HNRNPF;HNRNPF;HNRNPF;HNRNPF	5'UTR;5'UTR;5'UTR;5'UTR;5'UTR;5'UTR	NA	NA
cg13941235	2.35997e-10	-0.00735534	0.228296	chr9	137270186	RXRA	Body	NA	NA
cg23386330	2.38979e-10	0.00428695	0.741221	chr11	13977556			NA	NA
cg11025974	2.40164e-10	0.00476773	0.735397	chr2	152830521	CACNB4;CACNB4;CACNB4;CACNB4	Body;Body;Body;TSS200	NA	NA
cg26267561	2.40949e-10	-0.00693004	0.390664	chr20	3052224	OXT	TSS200	NA	NA
cg12838168	2.41627e-10	0.00595644	0.618047	chr3	194085842	LRRC15;LRRC15	5'UTR;5'UTR	NA	NA
cg15656686	2.43579e-10	0.0052911	0.777759	chr6	30854551	DDR1;DDR1	5'UTR;5'UTR	NA	NA
cg16956745	2.45934e-10	0.00152805	0.60828	chr1	36689900	THRAP3	TSS200	NA	NA
cg22065124	2.46761e-10	0.0065729	0.835333	chr13	73649955	KLF5	Body	NA	NA
cg23677657	2.49249e-10	0.00311793	0.983428	chr7	96619076	DLX6AS	Body	NA	NA
cg11469321	2.51301e-10	0.00328037	0.683702	chr4	104021294	BDH2	TSS1500	NA	NA
cg14461963	2.51452e-10	0.00144581	0.785585	chr10	12111049	DHTKD1	1stExon	NA	NA
cg18378811	2.52003e-10	0.00766863	0.664155	chr4	114900050	ARSJ;ARSJ	1stExon;5'UTR	NA	NA
cg24224803	2.53689e-10	0.00131451	0.713419	chr6	160183104	ACAT2;ACAT2	5'UTR;1stExon	NA	NA
cg02255004	2.5425e-10	0.00433091	0.679674	chr4	80748660	GDEP	Body	NA	NA
cg08165151	2.54683e-10	0.00147426	0.990526	chr6	88411075	NCRNA00120;AKIRIN2	TSS200;Body	NA	NA
cg24794206	2.58638e-10	0.00146893	0.980147	chr6	155316492			NA	NA
cg02646021	2.60932e-10	0.00279614	0.839024	chr2	223176846			NA	NA
cg18587063	2.61956e-10	-0.00623589	0.441073	chr11	122940457			NA	NA
cg21702128	2.62293e-10	0.00139965	0.935352	chr5	142784721	NR3C1;NR3C1;NR3C1;NR3C1;NR3C1;NR3C1;NR3C1	TSS1500;5'UTR;5'UTR;TSS1500;5'UTR;TSS1500;TSS1500	NA	NA
cg10438089	2.62425e-10	-0.00569836	0.841098	chr17	47818514	FAM117A	Body	NA	NA
cg20540327	2.65542e-10	0.00143257	0.996182	chr15	72668275	HEXA;C15orf34	1stExon;TSS200	NA	NA
cg06942064	2.65595e-10	0.00152668	0.343809	chr1	208417143	PLXNA2;PLXNA2	5'UTR;1stExon	NA	NA
cg20023184	2.6946e-10	-0.00593424	0.920916	chr15	50150583	ATP8B4	3'UTR	NA	NA
cg00098280	2.69806e-10	0.00124982	0.775992	chr18	29523426	KIAA1012	TSS1500	NA	NA
cg13754949	2.72165e-10	0.00123427	0.516947	chr2	100105657	REV1;REV1	5'UTR;5'UTR	NA	NA
cg14789804	2.72221e-10	0.0013915	0.906073	chr12	58087958	OS9;OS9;OS9;OS9	1stExon;1stExon;1stExon;1stExon	NA	NA
cg15630458	2.72711e-10	0.00828533	0.0395398	chr8	142986649			NA	NA
cg13823169	2.73723e-10	-0.00371712	0.422213	chr9	139776893			NA	NA
cg06690633	2.74871e-10	0.00158256	0.600411	chr14	65438715	RAB15	1stExon	NA	NA
cg23230564	2.77032e-10	-0.0063194	0.365307	chr5	31470890	RNASEN;RNASEN	Body;Body	NA	NA
cg06362282	2.77854e-10	-0.00474436	0.814687	chr6	33245893	B3GALT4	1stExon	NA	NA
cg08204702	2.78134e-10	0.00222851	0.991474	chr5	59189849	PDE4D;PDE4D	Body;TSS1500	NA	NA
cg19240637	2.79624e-10	-0.0050115	0.940424	chr2	7172297	RNF144A	Body	NA	NA
cg05514299	2.80429e-10	-0.00636088	0.301688	chr17	74868670	MGAT5B;MGAT5B	Body;TSS200	NA	NA
cg10716612	2.81589e-10	0.00391868	0.640624	chr4	184113429	WWC2	Body	NA	NA
cg07747571	2.83326e-10	0.00264444	0.296484	chr3	12910409			NA	NA
cg00609834	2.8378e-10	0.00215747	0.468205	chr11	13984596	SPON1	1stExon	NA	NA
cg12006375	2.84021e-10	-0.00648451	0.440665	chr13	51640315	GUCY1B2	TSS200	NA	NA
cg17539315	2.84324e-10	0.0014401	0.880719	chr12	50794919	LARP4;LARP4;LARP4;LARP4;LARP4;LARP4;LARP4	Body;Body;Body;Body;Body;Body;Body	NA	NA
cg05518939	2.84366e-10	0.00117075	0.475155	chr3	121554459	IQCB1;IQCB1;EAF2	TSS1500;TSS1500;Body	NA	NA
cg09244754	2.86976e-10	0.00125517	0.699578	chr6	122792965	PKIB;SERINC1	TSS200;TSS200	NA	NA
cg22806002	2.89042e-10	0.00343115	0.752206	chr11	111383083	BTG4;MIR34C;MIR34B	TSS200;TSS1500;TSS1500	NA	NA
cg13882090	2.89222e-10	-0.00399065	0.467091	chr6	33246094	B3GALT4	1stExon	NA	NA
cg25437531	2.90564e-10	-0.00749235	0.881357	chr11	33880362	LMO2;LMO2;LMO2	3'UTR;3'UTR;3'UTR	NA	NA
cg09259843	2.93011e-10	-0.00433582	0.349692	chr2	25452362			NA	NA
cg05100916	2.93852e-10	0.00146985	0.638547	chr7	112090586	IFRD1;IFRD1;IFRD1	1stExon;5'UTR;5'UTR	NA	NA
cg17272224	2.94355e-10	0.00290787	0.763254	chr2	45237885	SIX2	TSS1500	NA	NA
cg19351701	2.94979e-10	0.00163389	0.459377	chr7	27212935	HOXA10;HOXA10	Body;Body	NA	NA
cg11352146	2.97373e-10	-0.00194248	0.496496	chr11	65192550	NEAT1	Body	NA	NA
cg09109411	2.97698e-10	-0.00402087	0.132083	chr5	149319112	PDE6A	Body	NA	NA
cg09898695	2.98081e-10	0.00479444	0.93358	chr15	41135793	SPINT1;SPINT1;SPINT1	TSS1500;TSS1500;TSS1500	NA	NA
cg05707190	2.9812e-10	0.00161043	0.774001	chr15	99558427			NA	NA
cg11286618	2.98332e-10	0.00145948	0.73272	chr2	74685465	WBP1	TSS200	NA	NA
cg06927324	2.99009e-10	0.00142743	0.720085	chr14	74111701	DNAL1;DNAL1	1stExon;5'UTR	NA	NA
cg14991769	3.02014e-10	0.00682261	0.597373	chr7	150497157	TMEM176B;TMEM176B;TMEM176A;TMEM176B;TMEM176B;TMEM176B	TSS1500;5'UTR;TSS1500;5'UTR;5'UTR;5'UTR	NA	NA
cg24803517	3.02452e-10	0.00608253	0.937698	chr5	94621517	MCTP1	TSS1500	NA	NA
cg24561305	3.03298e-10	0.00483139	0.411096	chr13	29149132			NA	NA
cg01912955	3.03426e-10	0.00331493	0.0531563	chr6	100906383	SIM1	Body	NA	NA
cg09884635	3.03693e-10	0.00593885	0.313456	chr5	132084068	CCNI2	Body	NA	NA
cg10350350	3.05012e-10	0.005487	0.565406	chr11	43983977			NA	NA
cg01309328	3.08117e-10	-0.00569621	0.465293	chr6	32811253	PSMB8;PSMB8	Body;Body	NA	NA
cg17200690	3.12021e-10	-0.00470466	0.579658	chr6	33245619	B3GALT4	1stExon	NA	NA
cg21184629	3.13685e-10	0.0012872	0.598653	chr9	38621834	C9orf122;ANKRD18A	Body;TSS1500	NA	NA
cg00216504	3.16682e-10	0.00162702	0.232989	chr7	91763516	CYP51A1;CYP51A1	5'UTR;1stExon	NA	NA
cg03609269	3.17605e-10	0.0013872	0.277296	chr1	53393023	SCP2;SCP2;SCP2;SCP2	5'UTR;1stExon;1stExon;5'UTR	NA	NA
cg13149245	3.19007e-10	-0.00602541	0.681357	chr15	65105500			NA	NA
cg12897370	3.19371e-10	0.0014191	0.398901	chr6	155055079	RBM16	Body	NA	NA
cg14773228	3.19392e-10	0.00370456	0.715042	chr2	121627212	GLI2	Body	NA	NA
cg05674475	3.24906e-10	0.00128912	0.583429	chr4	42154385	BEND4;BEND4	5'UTR;5'UTR	NA	NA
cg20885089	3.25604e-10	0.0013347	0.889596	chr1	110162701	AMPD2;AMPD2;AMPD2	1stExon;TSS1500;5'UTR	NA	NA
cg04332914	3.26831e-10	0.00137808	0.703616	chr3	53381587	DCP1A;DCP1A	5'UTR;1stExon	NA	NA
cg13265914	3.27612e-10	0.00180158	0.891409	chr8	21999630	REEP4	TSS200	NA	NA
cg18125479	3.30318e-10	0.0014801	0.744987	chr14	51411049	PYGL;PYGL	1stExon;1stExon	NA	NA
cg19352726	3.31038e-10	-0.00351421	0.840058	chr6	42757805			NA	NA
cg20739223	3.31201e-10	0.00134385	0.704563	chr2	64371680	PELI1	TSS200	NA	NA
cg11753286	3.32778e-10	0.00124755	0.307382	chr6	32164000	GPSM3;NOTCH4	TSS1500;Body	NA	NA
cg01739167	3.38199e-10	-0.00394229	0.756273	chr17	4806344	CHRNE	1stExon	NA	NA
cg10308810	3.3835e-10	0.00559777	0.951007	chr10	49514273			NA	NA
cg00982136	3.39252e-10	-0.00576317	0.564813	chr2	201726139	CLK1;CLK1;CLK1;CLK1	Body;Body;Body;Body	NA	NA
cg09152866	3.40393e-10	-0.00643173	0.0571217	chr6	11714562	C6orf105;C6orf105	3'UTR;3'UTR	NA	NA
cg21105928	3.40638e-10	0.00478707	0.815784	chr15	40143956	GPR176	Body	NA	NA
cg10472651	3.40896e-10	-0.00392715	0.753132	chr16	66555859	TK2	Body	NA	NA
cg16057915	3.41233e-10	-0.00647589	0.462584	chr1	10690564	PEX14	3'UTR	NA	NA
cg09866743	3.41984e-10	-0.00530117	0.733336	chr3	35706038	ARPP-21	5'UTR	NA	NA
cg15035133	3.42598e-10	-0.00492241	0.537539	chr22	37962637	CDC42EP1	Body	NA	NA
cg15903213	3.44257e-10	0.00538454	0.668479	chr10	43522190			NA	NA
cg11637191	3.47356e-10	0.00145462	0.718154	chr1	231557525	EGLN1	1stExon	NA	NA
cg06825833	3.47552e-10	0.00159453	0.844581	chr13	111566802	ANKRD10	Body	NA	NA
cg01471713	3.48425e-10	0.00456683	0.876856	chr1	220864279	C1orf115	Body	NA	NA
cg02855778	3.48739e-10	0.00545397	0.924394	chr7	157462914	PTPRN2;PTPRN2;PTPRN2	Body;Body;Body	NA	NA
cg12180253	3.49357e-10	0.00658469	0.929951	chr19	3435746	NFIC;NFIC	Body;Body	NA	NA
cg22603569	3.49453e-10	-0.00630371	0.880443	chr19	3388047	NFIC;NFIC	Body;Body	NA	NA
cg26271591	3.50567e-10	-0.00643209	0.955031	chr2	178125956	NFE2L2;NFE2L2;NFE2L2	Body;5'UTR;5'UTR	NA	NA
cg22835157	3.50752e-10	0.00148608	0.752335	chr15	41218352			NA	NA
cg03746015	3.51071e-10	-0.00714212	0.618806	chr16	11141000	CLEC16A	Body	NA	NA
cg22679406	3.55182e-10	0.0081135	0.153371	chr6	29599331	GABBR1;GABBR1	Body;Body	NA	NA
cg01899130	3.55996e-10	-0.0118216	0.189563	chr14	55348681	GCH1;GCH1;GCH1;GCH1	Body;Body;Body;Body	NA	NA
cg26008908	3.56898e-10	0.00347343	0.213614	chr12	120799332	MSI1	Body	NA	NA
cg26925644	3.59175e-10	0.00369062	0.889288	chr11	118476517	PHLDB1	TSS1500	NA	NA
cg10341242	3.61497e-10	-0.00382839	0.779807	chr16	50347849	ADCY7	Body	NA	NA
cg12790037	3.62403e-10	0.00107299	0.838094	chr3	37035117	MLH1;MLH1;MLH1;EPM2AIP1;MLH1	TSS200;TSS200;1stExon;TSS1500;TSS200	NA	NA
cg04994481	3.62419e-10	0.00504554	0.13613	chr14	65345381			NA	NA
cg16071359	3.64513e-10	0.00156292	0.593556	chr2	169312933	LASS6;LASS6	5'UTR;1stExon	NA	NA
cg07777703	3.65169e-10	0.00303664	0.595833	chr17	40811829	TUBG2	Body	NA	NA
cg21631918	3.66105e-10	0.0045384	0.958312	chr15	74501549	STRA6;STRA6;STRA6	TSS200;TSS200;TSS200	NA	NA
cg21849780	3.68174e-10	-0.00584798	0.701291	chr2	99226313	C2orf64;UNC50	TSS1500;Body	NA	NA
cg22845765	3.69567e-10	-0.00588638	0.751868	chr5	146970636			NA	NA
cg03801144	3.70514e-10	0.00134874	0.906571	chr9	127951957	PPP6C;PPP6C;PPP6C	1stExon;1stExon;1stExon	NA	NA
cg11371681	3.74963e-10	0.00138532	0.625844	chr1	26606896	SH3BGRL3	Body	NA	NA
cg00383763	3.75417e-10	0.00545688	0.30648	chr1	202682124			NA	NA
cg05670596	3.7622e-10	0.00341958	0.630316	chr3	46448496	CCRL2;CCRL2	TSS1500;TSS1500	NA	NA
cg23037611	3.77663e-10	0.00161349	0.387606	chr5	113697946	KCNN2	TSS200	NA	NA
cg05382782	3.78899e-10	0.00489074	0.556937	chr11	117801332	TMPRSS13	TSS1500	NA	NA
cg09197074	3.8525e-10	0.00127333	0.353436	chr11	122933690	HSPA8;HSPA8	TSS1500;TSS1500	NA	NA
cg26347745	3.87405e-10	0.00125072	0.412723	chr3	129159008	IFT122;IFT122;IFT122;MBD4;IFT122;IFT122;IFT122;IFT122;IFT122	1stExon;5'UTR;5'UTR;TSS200;1stExon;5'UTR;5'UTR;1stExon;1stExon	NA	NA
cg13752254	3.90263e-10	0.00359834	0.398446	chr19	55940813	SHISA7	3'UTR	NA	NA
cg27506442	3.90294e-10	-0.00444966	0.657246	chr13	30948716	LOC100188949	TSS1500	NA	NA
cg04165030	3.92256e-10	0.00130969	0.621874	chr5	175843293	CLTB;CLTB	1stExon;1stExon	NA	NA
cg26321999	3.92545e-10	0.00676576	0.930116	chr6	30854011	DDR1;DDR1	5'UTR;5'UTR	NA	NA
cg25612391	3.93015e-10	0.00646106	0.864405	chr19	19216451	SLC25A42	Body	NA	NA
cg07133729	3.95882e-10	0.00118715	0.308876	chr7	98977840	ARPC1B	5'UTR	NA	NA
cg05910443	3.98857e-10	-0.00579349	0.360385	chr7	101688675	CUX1;CUX1;CUX1	Body;Body;Body	NA	NA
cg16975959	4.00207e-10	0.00152561	0.338825	chr2	223184510			NA	NA
cg07656173	4.00805e-10	-0.00832904	0.296428	chr4	16086023	PROM1;PROM1	TSS1500;TSS1500	NA	NA
cg02830467	4.00972e-10	-0.00540149	0.325784	chr6	153018721	MYCT1	TSS1500	NA	NA
cg04716261	4.02181e-10	0.00373209	0.605226	chr1	2937999	ACTRT2	TSS200	NA	NA
cg14070755	4.02481e-10	0.0056114	0.0761619	chr2	238394933	MLPH;MLPH	TSS1500;TSS1500	NA	NA
cg25107978	4.07233e-10	0.00125827	0.415662	chr12	57916571	MBD6	TSS200	NA	NA
cg19540316	4.08997e-10	-0.00513334	0.826334	chr13	113622750	MCF2L	TSS200	NA	NA
cg08658594	4.10135e-10	0.00379418	0.12392	chr12	11062035	TAS2R13;TAS2R13;PRR4;PRH1	5'UTR;1stExon;Body;5'UTR	NA	NA
cg11344692	4.12814e-10	0.00125713	0.907034	chr8	61429175	RAB2A	TSS1500	NA	NA
cg16087527	4.14411e-10	0.001465	0.306876	chr10	978019			NA	NA
cg00569418	4.21456e-10	-0.0041089	0.376646	chr19	50192100	C19orf76;C19orf76	1stExon;5'UTR	NA	NA
cg06577463	4.23236e-10	0.00137389	0.526314	chr17	78120714	EIF4A3	1stExon	NA	NA
cg19048176	4.24296e-10	0.00471938	0.0767427	chr6	32120324	PPT2;PRRT1;PPT2	TSS1500;TSS1500;TSS1500	NA	NA
cg17192381	4.29979e-10	0.0035903	0.518547	chr18	60792598	BCL2	3'UTR	NA	NA
cg14518658	4.33388e-10	0.00534877	0.987966	chr22	37726676			NA	NA
cg05460329	4.33431e-10	0.0061605	0.802447	chr22	19512903	CLDN5;CLDN5	TSS200;TSS200	NA	NA
cg03494795	4.34094e-10	0.00155743	0.11534	chr9	133710827	ABL1;ABL1	TSS200;Body	NA	NA
cg20566420	4.34135e-10	0.00164623	0.751727	chr12	122327043	PSMD9	Body	NA	NA
cg06651054	4.39617e-10	0.00193304	0.803551	chr15	83680015	C15orf40;C15orf40;C15orf40;C15orf40;C15orf40;C15orf40;C15orf40	Body;Body;Body;Body;Body;Body;Body	NA	NA
cg01891736	4.41253e-10	-0.00550228	0.628634	chr16	11655159	LITAF;LITAF;LITAF;LITAF	5'UTR;5'UTR;Body;5'UTR	NA	NA
cg14035860	4.41846e-10	0.00871834	0.633664	chr14	55707715			NA	NA
cg25735922	4.45754e-10	0.00291108	0.312363	chr11	76432800	GUCY2E	Body	NA	NA
cg06214220	4.46293e-10	0.00155083	0.985778	chr9	36400252	RNF38;RNF38;RNF38;RNF38;RNF38;RNF38;RNF38	5'UTR;5'UTR;5'UTR;5'UTR;1stExon;5'UTR;1stExon	NA	NA
cg12796306	4.54517e-10	0.00435764	0.910936	chr8	67406954	C8orf46	Body	NA	NA
cg07434407	4.60489e-10	0.00133769	0.326837	chr8	17941764	ASAH1;ASAH1;ASAH1;ASAH1	5'UTR;Body;1stExon;Body	NA	NA
cg15131146	4.62716e-10	-0.00420456	0.914996	chr1	26101755	MAN1C1	Body	NA	NA
cg19115490	4.64017e-10	-0.0034847	0.224288	chr6	37483925			NA	NA
cg18765542	4.64051e-10	0.00336157	0.706472	chr11	46354101	DGKZ	TSS1500	NA	NA
cg24258347	4.67597e-10	0.00668503	0.607606	chr11	13983851	SPON1	TSS200	NA	NA
cg12927772	4.67703e-10	0.00137194	0.0907046	chr9	86571585	C9orf64;C9orf64	5'UTR;1stExon	NA	NA
cg00410926	4.68895e-10	0.0060721	0.0789604	chr9	35563534	FAM166B;FAM166B	Body;Body	NA	NA
cg26033520	4.69286e-10	-0.00456346	0.504719	chr10	74004071			NA	NA
cg02361027	4.7313e-10	0.00562707	0.00056284	chr2	170217401	LRP2	Body	NA	NA
cg10919398	4.73312e-10	0.00145332	0.354199	chr6	32940274	BRD2;BRD2	5'UTR;5'UTR	NA	NA
cg04364219	4.7569e-10	0.00502044	0.261825	chr2	45234140	SIX2	Body	NA	NA
cg07217350	4.7968e-10	-0.00543889	0.325364	chr5	162934022	MAT2B;MAT2B	Body;Body	NA	NA
cg09039890	4.83013e-10	0.00291233	0.005835	chr6	105399558			NA	NA
cg27429749	4.83547e-10	-0.00490118	0.909392	chr11	57333612	UBE2L6;UBE2L6	Body;5'UTR	NA	NA
cg26883033	4.86063e-10	0.00490103	0.630339	chr10	80027004			NA	NA
cg19588519	4.90034e-10	0.00456228	0.211264	chr10	125817817			NA	NA
cg13958614	4.95656e-10	0.0017746	0.412329	chr5	72744196	FOXD1;FOXD1	5'UTR;1stExon	NA	NA
cg07551659	4.96743e-10	0.00269352	0.734758	chr15	57669165	CGNL1	5'UTR	NA	NA
cg18537222	4.96999e-10	-0.00536032	0.244278	chr3	12435731	PPARG;PPARG;PPARG;PPARG	Body;Body;Body;Body	NA	NA
cg18900591	4.98495e-10	0.00733925	0.445443	chr20	50419193	SALL4	TSS200	NA	NA
cg05310240	4.98516e-10	0.00531265	0.220503	chr17	47979069			NA	NA
cg16694480	4.98622e-10	-0.00549852	0.707901	chr1	19732786	CAPZB	Body	NA	NA
cg01373189	5.00667e-10	-0.00418542	0.9086	chr13	33002820	N4BP2L1;N4BP2L1	TSS1500;TSS1500	NA	NA
cg04159302	5.01157e-10	-0.00467303	0.888737	chr5	150162068	C5orf62	Body	NA	NA
cg08528970	5.0248e-10	-0.00532839	0.399818	chr4	76640579			NA	NA
cg05742294	5.03373e-10	0.00122783	0.792783	chr8	124169368			NA	NA
cg04722901	5.12719e-10	0.00527468	0.112936	chr5	16812392	MYO10	Body	NA	NA
cg05915362	5.1735e-10	0.00267161	0.224053	chr6	159274480	OSTCL	Body	NA	NA
cg15270851	5.18167e-10	0.00144119	0.822691	chr13	111358291	CARS2	1stExon	NA	NA
cg23891487	5.19153e-10	-0.00942804	0.150311	chr12	93969700	SOCS2	3'UTR	NA	NA
cg05937055	5.1974e-10	-0.0043023	0.357082	chr1	181128764			NA	NA
cg00460983	5.21326e-10	-0.00352681	0.682438	chr10	91133941			NA	NA
cg24266651	5.2187e-10	0.00517218	0.233368	chr11	7506655	OLFML1;OLFML1	5'UTR;1stExon	NA	NA
cg09793866	5.23638e-10	0.00503415	0.767244	chr8	38009548	STAR;STAR	TSS1500;TSS1500	NA	NA
cg05133578	5.29754e-10	0.00133217	0.83984	chr12	46663407	SLC38A1;SLC38A1	TSS200;TSS200	NA	NA
cg06940720	5.30752e-10	0.00485222	0.0934792	chr5	1526929			NA	NA
cg21772826	5.32508e-10	-0.00435456	0.682103	chr3	189040394	TPRG1	3'UTR	NA	NA
cg09299082	5.32564e-10	0.00467139	0.945226	chr17	45286354	MYL4;MYL4	TSS200;TSS1500	NA	NA
cg03570994	5.35411e-10	0.00463544	0.0977557	chr6	32121143	PPT2;PPT2;PRRT1	TSS200;TSS1500;TSS1500	NA	NA
cg00123478	5.37168e-10	0.0052937	0.985076	chr4	10458165	ZNF518B	5'UTR	NA	NA
cg18014844	5.419e-10	0.00163798	0.600648	chr1	55230402	PARS2	TSS1500	NA	NA
cg20236750	5.4239e-10	0.00497925	0.168029	chr10	95516908	LGI1	TSS1500	NA	NA
cg20400592	5.43059e-10	0.00625965	0.542066	chr13	51418041	DLEU7	TSS200	NA	NA
cg10120652	5.45553e-10	0.00498553	0.162522	chr8	9182252			NA	NA
cg23815462	5.47692e-10	0.0015249	0.744167	chr19	57923049	ZNF17	Body	NA	NA
cg27359668	5.48057e-10	0.00339986	0.521716	chr13	113673103	MCF2L;MCF2L	Body;Body	NA	NA
cg23067281	5.50363e-10	0.00138826	0.469665	chr14	92980103	RIN3	TSS200	NA	NA
cg14836522	5.5208e-10	0.00498071	0.983753	chr1	31375133	SDC3	Body	NA	NA
cg07724982	5.52351e-10	0.00132174	0.328228	chr5	7869189	MTRR;MTRR;FASTKD3	TSS200;TSS200;TSS200	NA	NA
cg11541486	5.524e-10	0.00512915	0.193481	chr17	72358055	BTBD17	TSS200	NA	NA
cg04073608	5.53765e-10	0.00116215	0.69122	chr11	65268100	MALAT1	Body	NA	NA
cg13123009	5.56844e-10	0.00417941	0.913151	chr6	31681882	LY6G6E;LY6G6D;LY6G6E	TSS200;TSS1500;TSS200	NA	NA
cg00592063	5.57037e-10	0.0011778	0.0640772	chr2	71295358	NAGK	TSS200	NA	NA
cg01715745	5.59949e-10	0.00401331	0.93053	chr1	54930156			NA	NA
cg06620514	5.64416e-10	0.00556608	0.884432	chr14	74793271			NA	NA
cg03391040	5.67702e-10	0.0013238	0.578716	chr19	37569273	ZNF420	TSS200	NA	NA
cg06767187	5.69296e-10	0.00551972	0.535962	chr7	2640127	IQCE;IQCE	Body;Body	NA	NA
cg06732395	5.70491e-10	0.00166739	0.475758	chr5	180018722	SCGB3A1	TSS1500	NA	NA
cg00041872	5.7198e-10	0.00135529	0.87782	chr1	46632690			NA	NA
cg15054197	5.73647e-10	0.00147463	0.633849	chr19	18433911	LSM4;LSM4	1stExon;5'UTR	NA	NA
cg24045875	5.7718e-10	-0.00392713	0.855998	chr20	61425320			NA	NA
cg16020551	5.80087e-10	0.00165865	0.383105	chr9	130890638	LOC389791;PTGES2;PTGES2;PTGES2	TSS200;TSS200;Body;Body	NA	NA
cg11945474	5.84529e-10	-0.00358443	0.987598	chr2	55717980			NA	NA
cg01523370	5.84705e-10	0.0012721	0.975244	chr3	120068337	LRRC58	TSS200	NA	NA
cg14310696	5.85534e-10	0.00154273	0.83981	chr3	87276184	CHMP2B	TSS1500	NA	NA
cg01519164	5.86425e-10	0.00130622	0.595467	chr14	69619846	DCAF5;DCAF5	5'UTR;1stExon	NA	NA
cg07176842	5.8661e-10	-0.00632029	0.1603	chr14	43972223			NA	NA
cg25820693	5.9045e-10	0.00127419	0.455014	chr1	151119084	SEMA6C;SEMA6C	1stExon;5'UTR	NA	NA
cg05584950	5.91174e-10	-0.0066177	0.291336	chr2	86012847	ATOH8	Body	NA	NA
cg22365240	5.9366e-10	-0.00526566	0.649808	chr2	105374995			NA	NA
cg04425005	5.95643e-10	0.00363481	0.872772	chr4	146783253	ZNF827	Body	NA	NA
cg03587511	5.97055e-10	0.00148371	0.350991	chr1	44115742	KDM4A	TSS200	NA	NA
cg20292636	5.98403e-10	0.00480762	0.509187	chr1	204328377	PLEKHA6	5'UTR	NA	NA
cg05890727	6.0096e-10	-0.00602976	0.768866	chr14	55764647	FBXO34;FBXO34	5'UTR;5'UTR	NA	NA
cg02736908	6.01029e-10	0.00452465	0.256345	chr17	29887376			NA	NA
cg23032421	6.0248e-10	0.00713124	0.257941	chr3	3152038	IL5RA;IL5RA;IL5RA;IL5RA;IL5RA;IL5RA;IL5RA;IL5RA;IL5RA;IL5RA;IL5RA;IL5RA	5'UTR;5'UTR;1stExon;5'UTR;1stExon;1stExon;1stExon;1stExon;5'UTR;1stExon;5'UTR;5'UTR	NA	NA
cg00927594	6.0773e-10	0.00836574	0.160968	chr15	101514299	LRRK1	Body	NA	NA
cg05955566	6.0795e-10	0.00191233	0.769713	chr12	99038273	IKBIP;APAF1;IKBIP;APAF1;APAF1;APAF1;IKBIP;APAF1	Body;TSS1500;Body;TSS1500;TSS1500;TSS1500;Body;TSS1500	NA	NA
cg08726195	6.09118e-10	0.00142183	0.526972	chr7	77427851	PHTF2;PHTF2;TMEM60	TSS1500;TSS1500;TSS200	NA	NA
cg14490972	6.14017e-10	0.00136692	0.682291	chr6	43484812	POLR1C;YIPF3;POLR1C;POLR1C;POLR1C	1stExon;TSS200;5'UTR;1stExon;5'UTR	NA	NA
cg21484940	6.15392e-10	0.00809432	0.256163	chr7	48129992	UPP1;UPP1	5'UTR;5'UTR	NA	NA
cg01044662	6.18081e-10	-0.00510656	0.472472	chr2	75938360	C2orf3	TSS1500	NA	NA
cg01946193	6.19067e-10	0.00125157	0.663196	chr20	47895123	C20orf199;SNORD12C;C20orf199;C20orf199;ZNFX1	Body;TSS1500;Body;TSS200;TSS1500	NA	NA
cg05452345	6.19592e-10	0.00157293	0.609794	chr5	102455768	GIN1;GIN1	1stExon;5'UTR	NA	NA
cg14265704	6.20448e-10	0.00364259	0.624754	chr2	71131201	VAX2	Body	NA	NA
cg22086973	6.2298e-10	0.00114185	0.420402	chr5	77590574	AP3B1	TSS200	NA	NA
cg21035241	6.2304e-10	0.00132405	0.496787	chr19	50168129	IRF3;BCL2L12;BCL2L12	5'UTR;TSS1500;TSS1500	NA	NA
cg09258240	6.33185e-10	-0.00300866	0.782995	chr14	100613518	DEGS2	Body	NA	NA
cg14333542	6.36783e-10	-0.00348121	0.585134	chr10	75647561			NA	NA
cg02256576	6.37251e-10	0.00473216	0.759658	chr16	66995192	CES3;CES3	1stExon;5'UTR	NA	NA
cg05563107	6.38089e-10	0.00135856	0.131727	chr19	50528575	VRK3;VRK3;ZNF473;ZNF473;VRK3;VRK3	1stExon;5'UTR;TSS1500;TSS1500;1stExon;5'UTR	NA	NA
cg01824804	6.45054e-10	0.00151388	0.485626	chr5	121413478	LOX	1stExon	NA	NA
cg23741330	6.4509e-10	0.00336633	0.605653	chr6	116832940	FAM26E;BET3L	1stExon;Body	NA	NA
cg12490835	6.46307e-10	0.0036794	0.262706	chr10	22623821			NA	NA
cg11294761	6.50312e-10	0.00382673	0.934854	chr17	80275530	CD7	TSS200	NA	NA
cg26688911	6.55263e-10	0.00530729	0.0938753	chr20	39969536	LPIN3	TSS200	NA	NA
cg20794351	6.56914e-10	0.00688419	0.6512	chr8	21908746			NA	NA
cg12962778	6.57634e-10	0.00488449	0.743324	chr12	54778312	ZNF385A;ZNF385A;ZNF385A;ZNF385A	Body;Body;1stExon;5'UTR	NA	NA
cg03087607	6.6036e-10	0.00221125	0.768573	chr6	134210667	TCF21;TCF21	1stExon;1stExon	NA	NA
cg12113356	6.64827e-10	0.00582585	0.744425	chr3	112359494	CCDC80;CCDC80;CCDC80	5'UTR;1stExon;5'UTR	NA	NA
cg15626350	6.68159e-10	0.0123468	0.298192	chr6	152130207	ESR1;ESR1;ESR1;ESR1	Body;Body;Body;Body	NA	NA
cg11750756	6.70661e-10	0.00116915	0.861813	chr12	50135418	TMBIM6;TMBIM6	TSS200;5'UTR	NA	NA
cg15034393	6.7368e-10	-0.00523413	0.237833	chr3	152856773			NA	NA
cg05815196	6.74787e-10	0.00474821	0.825001	chr22	31536540	PLA2G3	TSS200	NA	NA
cg09338033	6.817e-10	0.00134796	0.765457	chr13	73633700	KLF5	1stExon	NA	NA
cg10874314	6.85423e-10	0.00473765	0.157169	chr10	129766623	PTPRE	5'UTR	NA	NA
cg12405341	6.8594e-10	0.00146602	0.356007	chr2	233415195	TIGD1;TIGD1;EIF4E2	5'UTR;1stExon;TSS200	NA	NA
cg01161725	6.86171e-10	0.00125781	0.900115	chr18	32924152	ZNF24	5'UTR	NA	NA
cg01246266	6.87666e-10	0.00143427	0.827038	chr17	76126490	TMC8;TMC6	TSS1500;5'UTR	NA	NA
cg18341116	6.90272e-10	0.00129453	0.568338	chr6	82957506	IBTK	TSS200	NA	NA
cg00796821	6.92849e-10	0.00632943	0.118898	chr7	128551757	KCP;KCP	TSS1500;TSS1500	NA	NA
cg22539505	6.94132e-10	0.00105497	0.74605	chr3	50330110	IFRD2	TSS200	NA	NA
cg26656658	6.99649e-10	0.00694679	0.571585	chr12	121615078	P2RX7	Body	NA	NA
cg01790646	6.99887e-10	-0.00383459	0.798404	chr2	240321229	HDAC4	5'UTR	NA	NA
cg01037108	7.01263e-10	0.00137533	0.506579	chr5	137911220	HSPA9	TSS200	NA	NA
cg11789321	7.05046e-10	-0.00356756	0.00146026	chr5	56773063			NA	NA
cg26468696	7.07868e-10	0.00555108	0.791952	chr5	141331010	PCDH12	Body	NA	NA
cg18369654	7.10888e-10	0.00438048	0.704012	chr1	145417038	HFE2;HFE2;HFE2;HFE2	3'UTR;3'UTR;3'UTR;3'UTR	NA	NA
cg14521421	7.11771e-10	0.00473325	0.602108	chr11	8862019	ST5	5'UTR	NA	NA
cg14015503	7.16226e-10	0.0014353	0.330278	chr19	57862554	ZNF304	TSS200	NA	NA
cg23355126	7.17468e-10	0.00132734	0.318133	chr21	34852107	TMEM50B	5'UTR	NA	NA
cg21223094	7.18031e-10	-0.00487102	0.0801716	chr12	11975515	ETV6	Body	-6.39	3e-10
cg05484920	7.1907e-10	0.00144481	0.862814	chr19	49588520	SNRNP70;SNRNP70	1stExon;5'UTR	NA	NA
cg24324441	7.2193e-10	0.00514107	0.600033	chr3	158519002	MFSD1;MFSD1	TSS1500;TSS1500	NA	NA
cg01599633	7.30961e-10	-0.0057168	0.524128	chr17	65372452	PITPNC1;PITPNC1	TSS1500;TSS1500	NA	NA
cg15103195	7.38151e-10	0.00149209	0.853665	chr7	100797603	AP1S1	TSS200	NA	NA
cg11442185	7.39494e-10	0.00113771	0.70126	chr12	56693681	CS	Body	NA	NA
cg00570362	7.43696e-10	0.00148151	0.94031	chr4	48344328	SLAIN2	Body	NA	NA
cg02564756	7.45617e-10	0.00131048	0.776688	chr3	128902977	CNBP;CNBP;CNBP;CNBP;CNBP;CNBP	TSS200;TSS200;TSS200;TSS200;TSS200;TSS200	NA	NA
cg03196720	7.4726e-10	-0.00807199	0.255443	chr12	6473299	SCNN1A;SCNN1A;SCNN1A	Body;Body;Body	NA	NA
cg03303585	7.47599e-10	-0.00391106	0.818749	chr4	75585178			NA	NA
cg09133386	7.50442e-10	0.00142671	0.590714	chr6	20404188	E2F3	Body	NA	NA
cg03610228	7.54422e-10	0.00675919	0.151853	chr10	21799395			NA	NA
cg11886014	7.54628e-10	0.00134957	0.646363	chr5	41904500	C5orf51	1stExon	NA	NA
cg11765288	7.55879e-10	-0.00380041	0.0662632	chr7	18535767	HDAC9;HDAC9;HDAC9;HDAC9;HDAC9	TSS200;5'UTR;5'UTR;TSS200;TSS200	NA	NA
cg03450829	7.60317e-10	-0.00331965	0.968766	chr11	1772468	HCCA2	Body	NA	NA
cg25015038	7.63897e-10	-0.00401854	0.704811	chr14	89604062			NA	NA
cg00895196	7.64615e-10	-0.00503413	0.302593	chr6	22147182	FLJ22536	Body	NA	NA
cg18133934	7.66585e-10	0.00132874	0.645542	chr22	23523310	BCR;BCR	1stExon;1stExon	NA	NA
cg12967093	7.68317e-10	0.00309385	0.629495	chr2	218621493	DIRC3	TSS200	NA	NA
cg24760467	7.69694e-10	-0.00521824	0.222452	chr10	102760784	LZTS2	5'UTR	NA	NA
cg00653609	7.72204e-10	0.00140854	0.741925	chr6	39082964	C6orf64	TSS200	NA	NA
cg26256521	7.73479e-10	-0.00501024	0.437386	chr14	105147537			NA	NA
cg13555278	7.73609e-10	0.00476587	0.163633	chr1	26348484	EXTL1;EXTL1	1stExon;5'UTR	NA	NA
cg10351914	7.73684e-10	0.00326214	0.468577	chr17	19290690	MFAP4	TSS200	NA	NA
cg07965894	7.77323e-10	0.00188003	0.745567	chr3	44036453			NA	NA
cg24256946	7.7859e-10	0.00136562	0.473522	chr19	796991	PTBP1;PTBP1;PTBP1;PTBP1	TSS1500;TSS1500;TSS1500;TSS1500	NA	NA
cg24727620	7.97512e-10	0.0014646	0.641575	chr7	86781902	DMTF1;DMTF1;DMTF1;DMTF1;DMTF1;DMTF1	1stExon;5'UTR;5'UTR;Body;Body;5'UTR	NA	NA
cg08594681	7.97882e-10	-0.00579832	0.343271	chr8	27468684	CLU;CLU;CLU;CLU	1stExon;Body;Body;5'UTR	NA	NA
cg15078061	8.08695e-10	0.00528116	0.56578	chr6	32117558	PRRT1	Body	NA	NA
cg04376719	8.12456e-10	0.00141123	0.670924	chr19	1028379	CNN2;CNN2	Body;Body	NA	NA
cg07658646	8.17974e-10	-0.00636594	0.389963	chr12	11002197	PRR4;PRR4	TSS200;Body	NA	NA
cg22732731	8.19341e-10	0.00303521	0.996159	chr2	220491907	SLC4A3;SLC4A3	TSS1500;TSS1500	NA	NA
cg26129353	8.20417e-10	-0.00468923	0.843632	chr18	55316927	ATP8B1	Body	NA	NA
cg24890964	8.2454e-10	-0.00370867	0.270291	chr20	36153642	BLCAP;BLCAP;BLCAP;BLCAP;BLCAP	5'UTR;TSS1500;5'UTR;5'UTR;5'UTR	NA	NA
cg18365406	8.29955e-10	0.00777459	0.515686	chr19	11472110	LPPR2;LPPR2	Body;Body	NA	NA
cg20155566	8.31306e-10	0.00146035	0.634641	chr17	26926074	SPAG5	TSS200	NA	NA
cg06388350	8.38406e-10	-0.004141	0.703052	chr4	95334135			NA	NA
cg09068198	8.42771e-10	0.00166993	0.953813	chr2	65357064	RAB1A;RAB1A;RAB1A;RAB1A	1stExon;5'UTR;5'UTR;1stExon	NA	NA
cg03875330	8.43236e-10	-0.00421157	0.385614	chr19	11455923	TMEM205;TMEM205;CCDC159;TMEM205	Body;Body;TSS1500;Body	NA	NA
cg15871206	8.44753e-10	-0.00792599	0.844317	chr2	239009118	ESPNL	1stExon	NA	NA
cg07562100	8.45961e-10	0.00105543	0.584747	chr15	68569975	FEM1B	TSS200	NA	NA
cg23425079	8.48808e-10	0.00193456	0.164045	chr6	31703503	CLIC1	Body	NA	NA
cg04702538	8.50487e-10	0.00127002	0.510998	chr17	16318972	TRPV2;TRPV2	1stExon;5'UTR	NA	NA
cg01974027	8.56739e-10	0.00556627	0.532805	chr1	114694766	SYT6	5'UTR	NA	NA
cg16666935	8.56832e-10	0.0014062	0.364455	chr13	31736119	HSPH1	TSS200	NA	NA
cg20930094	8.57939e-10	0.00154544	0.560977	chr2	113522299	CKAP2L	TSS200	NA	NA
cg10857905	8.59251e-10	0.00570084	0.0726433	chr10	80026963			NA	NA
cg03462733	8.59294e-10	0.00122892	0.810989	chr15	80445229	FAH	TSS200	NA	NA
cg04784315	8.69457e-10	-0.00441153	0.421405	chr9	125797284	GPR21;RABGAP1	1stExon;Body	NA	NA
cg01644611	8.72266e-10	-0.00412806	0.592777	chr20	3052253	OXT	TSS200	NA	NA
cg02619205	8.74341e-10	-0.00432044	0.0524577	chr9	117157157	AKNA	TSS1500	NA	NA
cg07471614	8.76155e-10	0.00431256	0.580168	chr8	125855152			NA	NA
cg09167861	8.8386e-10	-0.00692774	0.889655	chrX	135251741	FHL1;FHL1;FHL1;FHL1;FHL1;FHL1;FHL1;FHL1	Body;1stExon;5'UTR;5'UTR;TSS200;5'UTR;5'UTR;5'UTR	NA	NA
cg09636727	8.8523e-10	-0.0048778	0.656956	chr1	77477593	ST6GALNAC5	Body	NA	NA
cg22998476	8.85302e-10	0.00479539	0.982869	chr10	74058092			NA	NA
cg05076730	8.91401e-10	0.00470449	0.738713	chr8	129060815	MIR1207;PVT1	TSS1500;Body	NA	NA
cg16129988	8.94089e-10	0.00148952	0.817923	chr3	48647215	UQCRC1	TSS200	NA	NA
cg21090298	8.9951e-10	-0.00504039	0.295959	chr13	113622686	MCF2L	TSS200	NA	NA
cg03127104	9.00569e-10	0.00729626	0.170767	chr6	29599250	GABBR1;GABBR1	Body;Body	NA	NA
cg23378165	9.02598e-10	0.00541616	0.225667	chr17	9550256	USP43	Body	NA	NA
cg03680932	9.04199e-10	0.00436816	0.380986	chr6	16306683	ATXN1;ATXN1	Body;Body	NA	NA
cg20679955	9.07218e-10	0.00141082	0.52044	chr18	2846761	EMILIN2	TSS1500	NA	NA
cg10416593	9.09471e-10	-0.00544355	0.12713	chr22	50966123	TYMP;SCO2;TYMP;TYMP	Body;TSS1500;Body;Body	NA	NA
cg14372466	9.10865e-10	0.00143698	0.829799	chr18	3448468	TGIF1;TGIF1	5'UTR;Body	NA	NA
cg17606003	9.11488e-10	0.00175575	0.799502	chr10	102989376	FLJ41350;LBX1	Body;TSS1500	NA	NA
cg16300030	9.12518e-10	-0.00553328	0.478185	chr6	32908980	HLA-DMB	TSS200	NA	NA
cg05729581	9.13888e-10	0.00151334	0.293776	chr11	3078854	CARS;CARS;CARS;CARS	TSS200;TSS200;TSS200;TSS200	NA	NA
cg16092017	9.1496e-10	0.00363807	0.42277	chr5	134827643			NA	NA
cg26706803	9.1544e-10	-0.00749364	0.92025	chr16	50293530			NA	NA
cg00986050	9.23263e-10	0.00133284	0.183016	chr20	37376913	ACTR5	TSS200	NA	NA
cg17866734	9.27394e-10	0.00141248	0.918908	chr6	43484657	YIPF3;POLR1C;POLR1C;YIPF3	5'UTR;TSS200;TSS200;1stExon	NA	NA
cg13677897	9.27405e-10	0.00117319	0.0459974	chr7	5570593	ACTB	TSS1500	NA	NA
cg19802929	9.35657e-10	0.00381525	0.994972	chr14	32396820			NA	NA
cg10179004	9.41372e-10	0.00546682	0.262566	chr3	48601902	COL7A1;UCN2	Body;TSS1500	NA	NA
cg21132931	9.48235e-10	0.00150354	0.518986	chr17	43138592	DCAKD;NMT1	TSS200;TSS200	NA	NA
cg19205909	9.51452e-10	0.00219	0.352925	chr22	42353671	LOC339674	Body	NA	NA
cg12976582	9.54804e-10	0.00441646	0.889478	chr3	50359583	HYAL2;HYAL2	5'UTR;TSS1500	NA	NA
cg18604823	9.56565e-10	0.00836606	0.0656177	chr19	56687364	GALP;GALP	TSS200;TSS200	NA	NA
cg20384735	9.57148e-10	0.00149416	0.566413	chr1	231376893	GNPAT;C1orf131;C1orf131	TSS200;1stExon;5'UTR	NA	NA
cg21291356	9.58979e-10	0.00123607	0.691933	chr19	52692821	PPP2R1A	TSS1500	NA	NA
cg07215749	9.63908e-10	0.00127876	0.442699	chr12	93965475	SOCS2	5'UTR	NA	NA
cg13670898	9.64007e-10	0.00506949	0.507652	chr14	56792319			NA	NA
cg21269523	9.68691e-10	0.00120539	0.871352	chr2	88927294	EIF2AK3	TSS1500	NA	NA
cg10211518	9.76121e-10	0.00152131	0.998308	chr19	633735	POLRMT	TSS200	NA	NA
cg14887509	9.79206e-10	0.00127169	0.106052	chr1	27816781	WASF2	TSS200	NA	NA
cg24093139	9.80698e-10	0.00148099	0.821848	chr17	74582379	ST6GALNAC2	TSS1500	NA	NA
cg00079598	9.81372e-10	0.00498135	0.780996	chr11	123676903	OR6M1	1stExon	NA	NA
cg02750385	9.8201e-10	0.0014209	0.710564	chr13	41885554	NAA16;NAA16;NAA16;NAA16;NAA16;NAA16	5'UTR;5'UTR;1stExon;1stExon;1stExon;5'UTR	NA	NA
cg24035898	9.83694e-10	0.00639517	0.31753	chr1	159825595	VSIG8;C1orf204	Body;TSS1500	NA	NA
cg05251190	9.86931e-10	-0.00535333	0.962653	chr10	104196206	MIR146B	TSS200	NA	NA
cg14831266	9.87865e-10	0.00116153	0.75824	chr1	33283905	YARS;S100PBP;S100PBP	TSS1500;5'UTR;5'UTR	NA	NA
cg05477463	9.93647e-10	0.00122465	0.481058	chr16	67218055	KIAA0895L	TSS200	NA	NA
cg19763699	1.00717e-09	-0.00482616	0.797494	chr10	17756784	STAM	3'UTR	NA	NA
cg22697136	1.01277e-09	0.00374673	0.693494	chr1	11714248	FBXO44;FBXO2;FBXO44;FBXO44;FBXO44	TSS1500;Body;TSS1500;TSS200;TSS1500	NA	NA
cg17205324	1.01684e-09	0.00469923	0.742324	chr14	23835595	EFS;EFS	TSS1500;TSS1500	NA	NA
cg08151281	1.02199e-09	0.0012288	0.886352	chr1	167905380	DCAF6;BRP44;BRP44;BRP44;DCAF6	TSS1500;5'UTR;TSS200;TSS200;TSS1500	NA	NA
cg01735318	1.02232e-09	0.00165178	0.996231	chr2	24307664	TP53I3;TP53I3;TP53I3	1stExon;5'UTR;TSS200	NA	NA
cg14914519	1.02859e-09	0.00127802	0.942244	chr17	14205882	HS3ST3B1;MGC12916	Body;TSS1500	NA	NA
cg13117948	1.03252e-09	-0.006623	0.616128	chr4	16086051	PROM1;PROM1	TSS1500;TSS1500	NA	NA
cg02007567	1.03766e-09	0.00578057	0.0860655	chr16	10912696	FAM18A	TSS200	NA	NA
cg25562664	1.03897e-09	0.00152002	0.920273	chr3	119529148	NR1I2;NR1I2;NR1I2	Body;Body;Body	NA	NA
cg01660934	1.04333e-09	0.00541793	0.567601	chr16	68269041	ESRP2	Body	NA	NA
cg07399288	1.04411e-09	0.00113942	0.810134	chr7	66767504	PMS2L4;STAG3L4	TSS200;TSS200	NA	NA
cg07286341	1.04423e-09	0.00411677	0.219875	chr5	176923805	PDLIM7;PDLIM7;PDLIM7	5'UTR;5'UTR;5'UTR	NA	NA
cg27230009	1.04639e-09	-0.00376646	0.456128	chr3	11241399	HRH1;HRH1	5'UTR;5'UTR	NA	NA
cg23845574	1.04824e-09	0.00554201	0.817265	chr10	135051270	VENTX	TSS200	NA	NA
cg07103201	1.05466e-09	-0.00439327	0.32054	chr17	20171047	CYTSB;CYTSB	Body;Body	NA	NA
cg00715988	1.05513e-09	0.00187919	0.793133	chr14	96968640	PAPOLA	TSS200	NA	NA
cg08125972	1.05563e-09	0.00114861	0.470586	chr19	36705377	ZNF565;ZNF146;ZNF146;ZNF565;ZNF146	5'UTR;TSS200;TSS200;5'UTR;TSS200	NA	NA
cg24625240	1.05643e-09	0.00180255	0.258817	chr11	126081434	RPUSD4;RPUSD4;FAM118B	1stExon;1stExon;TSS200	NA	NA
cg25038082	1.05769e-09	0.00418481	0.57202	chr17	37896074	GRB7;GRB7	5'UTR;5'UTR	NA	NA
cg01961018	1.05826e-09	0.00154965	0.804916	chr14	67999752	PLEKHH1	TSS1500	NA	NA
cg11368628	1.06019e-09	-0.00412097	0.645741	chr11	1856183	SYT8	Body	NA	NA
cg01937803	1.06109e-09	0.00553127	0.644288	chr14	103605307			NA	NA
cg12893736	1.0626e-09	0.00484581	0.989009	chr17	72429636	GPRC5C;GPRC5C	TSS200;Body	NA	NA
cg05779219	1.06333e-09	0.00382114	0.0990564	chr20	23032166			NA	NA
cg12819393	1.07187e-09	0.00565508	0.29056	chr9	127240449			NA	NA
cg00088410	1.07481e-09	0.00424464	0.719638	chr3	72621886			NA	NA
cg19604369	1.07973e-09	0.00446914	0.818953	chr10	101604657	ABCC2	Body	NA	NA
cg07567308	1.08196e-09	0.00481999	0.960903	chr20	3149320	ProSAPiP1	TSS200	NA	NA
cg03828939	1.08507e-09	0.00142417	0.827682	chr16	2525452	TBC1D24	5'UTR	NA	NA
cg01596963	1.08827e-09	0.00424756	0.0204071	chr11	62455830	LRRN4CL	Body	NA	NA
cg17622952	1.09079e-09	0.00688891	0.954088	chr11	76025189			NA	NA
cg04539476	1.10336e-09	0.00330517	0.880588	chr14	23351487	REM2	TSS1500	NA	NA
cg15481493	1.10855e-09	-0.00419408	0.775668	chr11	35133274			NA	NA
cg00306421	1.11203e-09	0.00163213	0.268358	chr18	21033656	RIOK3	Body	NA	NA
cg16465559	1.12397e-09	-0.00450103	0.690992	chr8	105502059	LRP12;LRP12	3'UTR;3'UTR	NA	NA
cg01693598	1.13062e-09	0.00506162	0.576956	chr1	47998637			NA	NA
cg25047378	1.13344e-09	0.00128858	0.258616	chr1	44412582	IPO13;IPO13	5'UTR;1stExon	NA	NA
cg03753609	1.13501e-09	0.00126124	0.638595	chr5	34656973	RAI14;RAI14;RAI14	5'UTR;5'UTR;5'UTR	NA	NA
cg20414838	1.13751e-09	0.00120624	0.556	chr1	53704138	MAGOH;MAGOH	5'UTR;1stExon	NA	NA
cg03443996	1.14482e-09	0.00116466	0.444884	chr10	21784983	C10orf114	Body	NA	NA
cg14119792	1.1477e-09	-0.00593325	0.122735	chr6	31021422	HCG22	TSS1500	NA	NA
cg16600996	1.15193e-09	-0.00313936	0.225181	chr22	29699230			NA	NA
cg02678305	1.15359e-09	-0.00318899	0.210119	chr6	30460322	HLA-E	Body	NA	NA
cg00431236	1.15407e-09	0.0012947	0.949448	chr2	264988	ACP1;SH3YL1;ACP1;ACP1;ACP1;SH3YL1	1stExon;TSS1500;1stExon;1stExon;Body;TSS1500	NA	NA
cg03221914	1.15451e-09	0.0077204	0.947238	chr6	27783331	HIST1H2AJ	TSS1500	NA	NA
cg14645861	1.15915e-09	0.00481186	0.840934	chr6	30094987			NA	NA
cg08537737	1.15958e-09	-0.00402197	0.696392	chr8	70743047	SLCO5A1;SLCO5A1;SLCO5A1	Body;Body;Body	NA	NA
cg01519238	1.17047e-09	0.00118586	0.264663	chr8	145515711	HSF1;BOP1	Body;TSS1500	NA	NA
cg00303378	1.17254e-09	0.00674815	0.466847	chr1	159825552	VSIG8;C1orf204	Body;TSS1500	NA	NA
cg11024464	1.17272e-09	0.00120894	0.879744	chr3	119188307	KTELC1;KTELC1	Body;Body	NA	NA
cg23458168	1.17595e-09	0.00747605	0.0592238	chr19	30864867	ZNF536	5'UTR	NA	NA
cg17974142	1.17861e-09	0.0012472	0.841486	chr3	113464438	ATP6V1A;NAA50	TSS1500;Body	NA	NA
cg22982536	1.18131e-09	0.00122573	0.645797	chr13	24735537	SPATA13;MIR2276;SPATA13	5'UTR;TSS1500;5'UTR	NA	NA
cg00904823	1.18207e-09	0.00437356	0.28287	chr10	112418708	RBM20	Body	NA	NA
cg18327994	1.18598e-09	0.00130589	0.958495	chr9	132372705			NA	NA
cg27395342	1.18809e-09	0.00454071	0.851296	chr8	13224310	DLC1;DLC1	Body;Body	NA	NA
cg08267038	1.18943e-09	-0.00439242	0.366411	chr3	113325595	SIDT1	Body	NA	NA
cg04714110	1.19491e-09	0.00640294	0.226165	chr10	21799143			NA	NA
cg05643110	1.19539e-09	0.00140067	0.343276	chr3	155572308	SLC33A1	TSS200	NA	NA
cg11229872	1.19905e-09	0.00264654	0.280115	chr2	175195899			NA	NA
cg04697265	1.20468e-09	0.00446907	0.307554	chr11	130683700			NA	NA
cg00297680	1.21049e-09	0.00108322	0.806637	chr19	36869860			NA	NA
cg11261575	1.21154e-09	0.00145302	0.804175	chr12	113573751	RASAL1	5'UTR	NA	NA
cg11057205	1.21288e-09	-0.00647551	0.349693	chr8	134588243			NA	NA
cg16182479	1.21395e-09	0.00370158	0.469039	chr17	41832466	SOST	3'UTR	NA	NA
cg13240639	1.22075e-09	0.0013153	0.8526	chr22	30162856	UCRC;UCRC;ZMAT5;ZMAT5	TSS1500;TSS1500;5'UTR;5'UTR	NA	NA
cg10803034	1.2254e-09	-0.00543493	0.248158	chr11	3178188	OSBPL5;OSBPL5;OSBPL5	5'UTR;5'UTR;5'UTR	NA	NA
cg24643922	1.22577e-09	-0.00293757	0.553491	chr10	134236975			NA	NA
cg04693721	1.22831e-09	0.00120986	0.411817	chr12	58176694	TSFM	Body	NA	NA
cg04682802	1.23684e-09	-0.0071519	0.301628	chr20	11898478	BTBD3;BTBD3	5'UTR;TSS200	NA	NA
cg24500630	1.25042e-09	0.00359113	0.777731	chr11	110436181			NA	NA
cg27460715	1.25394e-09	0.00159467	0.751297	chr7	73668680	RFC2;RFC2	1stExon;1stExon	NA	NA
cg01109464	1.26672e-09	0.00326687	0.285163	chr15	60292819			NA	NA
cg21850518	1.26723e-09	0.00447227	0.261542	chr17	42357520			NA	NA
cg09646173	1.26732e-09	0.00485764	0.631862	chr5	149317669	PDE6A	Body	NA	NA
cg18157896	1.2958e-09	-0.00513693	0.482012	chr20	2795593	C20orf141;LOC100288797	TSS200;TSS1500	-6.06	2.2e-09
cg03871267	1.30144e-09	0.0050871	0.0374785	chr5	67483475			NA	NA
cg02416781	1.30304e-09	-0.00385324	0.395403	chr5	82331856			NA	NA
cg18037230	1.30532e-09	0.00132438	0.511476	chr19	33463091	C19orf40;CCDC123	TSS200;TSS1500	NA	NA
cg05623562	1.30947e-09	0.0013123	0.678525	chr18	77793509	C18orf22	TSS1500	NA	NA
cg18188328	1.31395e-09	-0.00909691	0.657367	chr6	15505094	JARID2	Body	NA	NA
cg10495047	1.31795e-09	0.00198252	0.823087	chr5	139017667			NA	NA
cg04772086	1.32249e-09	0.00106868	0.996674	chr1	51434994	CDKN2C;CDKN2C;CDKN2C	5'UTR;TSS1500;1stExon	NA	NA
cg02303505	1.32702e-09	0.00505327	0.99007	chr8	91592157			NA	NA
cg12860635	1.33167e-09	0.00669243	0.487466	chr6	30095140			NA	NA
cg06089988	1.33254e-09	0.00150365	0.961236	chr1	153748485	SLC27A3	1stExon	NA	NA
cg05367661	1.33436e-09	0.00159598	0.870174	chr7	48075128	C7orf57;C7orf57	1stExon;5'UTR	NA	NA
cg13928411	1.34083e-09	0.00384029	0.694855	chr16	22103791	VWA3A	TSS200	NA	NA
cg11276388	1.34113e-09	-0.00664948	0.11306	chr6	12064975	HIVEP1	Body	NA	NA
cg12622986	1.34838e-09	0.00293985	0.729386	chr9	135458173	BARHL1;BARHL1	1stExon;5'UTR	NA	NA
cg27488648	1.35089e-09	0.00343612	0.983767	chr11	118477034	PHLDB1;PHLDB1;PHLDB1	TSS200;TSS1500;TSS1500	NA	NA
cg02485566	1.35421e-09	0.00182029	0.436462	chr7	153749759	DPP6;DPP6	Body;TSS200	NA	NA
cg06907842	1.36768e-09	0.00132084	0.164345	chr18	42260451	SETBP1;SETBP1	5'UTR;TSS1500	NA	NA
cg03184439	1.36968e-09	0.00146108	0.509079	chr17	73008867	ICT1	1stExon	NA	NA
cg15690598	1.37411e-09	0.005609	0.327123	chr8	134806615			NA	NA
cg07599713	1.37683e-09	0.00483796	0.6105	chr6	91411191			NA	NA
cg02856070	1.38308e-09	0.0012851	0.908454	chr11	65686288	DRAP1;C11orf68;C11orf68	TSS1500;Body;Body	NA	NA
cg06400699	1.3832e-09	0.00170807	0.0882089	chr1	228328509	GUK1;GUK1	Body;5'UTR	NA	NA
cg05831672	1.38355e-09	0.00139604	0.488911	chr10	103543172	NPM3	TSS200	NA	NA
cg13552866	1.38421e-09	0.00166585	0.896609	chrX	15808408	ZRSR2	TSS200	NA	NA
cg12551813	1.39271e-09	0.00367657	0.909762	chr1	200781121	CAMSAP1L1	Body	NA	NA
cg15118447	1.39299e-09	-0.00609533	0.722603	chr6	159220343	EZR;EZR	Body;Body	NA	NA
cg10542027	1.39505e-09	0.00142924	0.4728	chr5	78532229	JMY;JMY	1stExon;5'UTR	NA	NA
cg00531307	1.39532e-09	0.00130497	0.67859	chr14	50998683	MAP4K5;MAP4K5;ATL1	Body;Body;TSS1500	NA	NA
cg14528881	1.39697e-09	0.00154588	0.842995	chr13	113864354	CUL4A;PCID2;PCID2;PCID2;CUL4A	5'UTR;TSS1500;TSS1500;TSS1500;Body	NA	NA
cg14751398	1.39717e-09	0.0015127	0.976091	chr6	20402153	E2F3;E2F3	1stExon;5'UTR	NA	NA
cg08398371	1.39981e-09	-0.00385163	0.368944	chr19	41814839	CCDC97	TSS1500	NA	NA
cg03877020	1.40456e-09	0.00193593	0.28288	chr6	31762680	VARS	Body	NA	NA
cg13930468	1.40708e-09	0.00134839	0.895333	chr4	18022372	LCORL;LCORL	Body;Body	NA	NA
cg04246167	1.40944e-09	-0.00425547	0.997246	chr3	58984465	C3orf67	5'UTR	NA	NA
cg11687746	1.4115e-09	0.00110113	0.741037	chr2	88354768	KRCC1	5'UTR	NA	NA
cg21355487	1.41331e-09	-0.00419358	0.881462	chr10	49688893	ARHGAP22	Body	NA	NA
cg02742969	1.42189e-09	0.00526028	0.929307	chr5	172175604			NA	NA
cg20059928	1.42195e-09	-0.00449546	0.704038	chr15	40361485			NA	NA
cg12800962	1.42203e-09	0.00425483	0.682542	chr20	48626437			NA	NA
cg23598480	1.42422e-09	0.00354892	0.71824	chr2	60102800			NA	NA
cg16807061	1.42931e-09	0.00219146	0.661734	chr17	2757748	RAP1GAP2;RAP1GAP2	Body;Body	NA	NA
cg04315264	1.43019e-09	0.00137439	0.534255	chr6	35436252	RPL10A	Body	NA	NA
cg27625732	1.43705e-09	-0.00499214	0.732001	chr9	131549075	TBC1D13	TSS1500	NA	NA
cg23225147	1.43754e-09	0.00327866	0.648222	chr11	2907754	CDKN1C;CDKN1C;CDKN1C	TSS1500;TSS1500;TSS1500	NA	NA
cg20150667	1.44028e-09	0.00129008	0.921123	chr10	102747550	C10orf2;MRPL43;MRPL43;MRPL43;C10orf2;C10orf2;C10orf2;C10orf2;MRPL43;C10orf2	1stExon;TSS1500;TSS1500;TSS1500;1stExon;5'UTR;5'UTR;5'UTR;TSS1500;5'UTR	NA	NA
cg19642148	1.4443e-09	0.00147421	0.618192	chr3	47844666	DHX30;DHX30;DHX30;DHX30	5'UTR;5'UTR;1stExon;1stExon	NA	NA
cg22438324	1.4552e-09	0.00129806	0.983449	chr14	20922915	APEX1;APEX1;OSGEP;OSGEP;APEX1	TSS1500;TSS1500;1stExon;5'UTR;TSS1500	NA	NA
cg04701628	1.46108e-09	-0.00363438	0.01498	chr16	31492263			NA	NA
cg05638787	1.46279e-09	-0.00315093	0.0684003	chr15	41062273	DNAJC17;C15orf62;C15orf62	Body;1stExon;5'UTR	NA	NA
cg05908442	1.46804e-09	-0.00506723	0.296948	chr15	77800637			NA	NA
cg19861824	1.46823e-09	0.00436362	0.941145	chr4	16901058	LDB2;LDB2	TSS1500;TSS1500	NA	NA
cg20710777	1.46859e-09	-0.00446799	0.234327	chr5	110411740	TSLP;TSLP	Body;Body	NA	NA
cg12444076	1.47289e-09	-0.00519055	0.178186	chr21	45722068	PFKL;PFKL	Body;Body	NA	NA
cg03325667	1.47365e-09	0.00561166	0.145207	chr10	43447292			NA	NA
cg07491676	1.4754e-09	0.00584083	0.729833	chr15	76400783	C15orf27	5'UTR	NA	NA
cg05871254	1.47732e-09	0.00924549	0.196803	chr17	14213225	HS3ST3B1	Body	NA	NA
cg17806418	1.48243e-09	0.00890308	0.0466483	chr6	29599319	GABBR1;GABBR1	Body;Body	NA	NA
cg13598881	1.48505e-09	-0.00459867	0.16979	chr6	2783665	WRNIP1;WRNIP1	Body;Body	NA	NA
cg02157224	1.49463e-09	0.00369564	0.805847	chr8	38368889	C8orf86	3'UTR	NA	NA
cg19761245	1.5005e-09	-0.00789989	0.228176	chr4	41366989	LIMCH1;LIMCH1;LIMCH1	Body;Body;Body	NA	NA
cg09481121	1.51394e-09	0.00917754	0.567125	chr5	78985425	CMYA5	TSS1500	NA	NA
cg25460807	1.51633e-09	0.00510856	0.268999	chr8	21908022			NA	NA
cg02671806	1.52465e-09	0.0012161	0.509212	chr15	65477420	CLPX	1stExon	NA	NA
cg24603481	1.53733e-09	-0.00544265	0.642018	chr1	44884784	RNF220	Body	NA	NA
cg11046380	1.53812e-09	0.00480626	0.357538	chr2	172543743	DYNC1I2	TSS1500	NA	NA
cg23474268	1.54392e-09	0.0013892	0.790855	chr19	19174709	SLC25A42	TSS200	NA	NA
cg18783055	1.55218e-09	0.00345482	0.690334	chr6	88639609			NA	NA
cg09351035	1.55494e-09	0.00125029	0.834083	chr11	748060	TALDO1	Body	NA	NA
cg06808305	1.55509e-09	0.00483754	0.376111	chr2	63270824	EHBP1;EHBP1;EHBP1;EHBP1	Body;Body;Body;Body	NA	NA
cg21205139	1.55913e-09	-0.00602446	0.604462	chr4	156681475	GUCY1B3	Body	NA	NA
cg17696044	1.55967e-09	-0.00695429	0.785323	chr11	70449316	SHANK2;SHANK2	Body;Body	NA	NA
cg13242895	1.5636e-09	-0.00544333	0.23577	chr1	216805707	ESRRG;ESRRG;ESRRG;ESRRG;ESRRG	Body;Body;Body;Body;Body	NA	NA
cg20032723	1.56372e-09	0.00135867	0.935386	chr11	126174041	DCPS	1stExon	NA	NA
cg00360761	1.56391e-09	-0.00528168	0.449876	chr2	43398079			-6.27	6.3e-10
cg14009688	1.56631e-09	0.00632241	0.832018	chr7	134464242	CALD1;CALD1;CALD1;CALD1;CALD1;CALD1	5'UTR;1stExon;1stExon;1stExon;5'UTR;5'UTR	NA	NA
cg00100012	1.56976e-09	0.00126112	0.902274	chr20	37302983			NA	NA
cg00860322	1.57304e-09	0.00134893	0.141894	chr5	54528989	CCNO	1stExon	NA	NA
cg24757978	1.58722e-09	0.00628035	0.685013	chr3	69003455			NA	NA
cg11021222	1.5886e-09	-0.00566937	0.307485	chr12	97300417	NEDD1;NEDD1;NEDD1;NEDD1	TSS1500;TSS1500;TSS1500;TSS1500	NA	NA
cg10738368	1.58945e-09	0.00375917	0.785835	chr2	74729551	LBX2;LOC151534	Body;TSS200	NA	NA
cg16605127	1.59382e-09	0.0012671	0.203218	chr19	10207191	ANGPTL6	Body	NA	NA
cg18334681	1.5986e-09	-0.00472858	0.451211	chr6	132066129	ENPP3	Body	NA	NA
cg09175009	1.59944e-09	0.00348813	0.261558	chr16	10912699	FAM18A	TSS200	NA	NA
cg03648361	1.6009e-09	0.00135117	0.781758	chr17	73893010	TRIM65	1stExon	NA	NA
cg21115120	1.60362e-09	0.00119384	0.44676	chr5	157158441	THG1L;THG1L	1stExon;5'UTR	NA	NA
cg04106903	1.60788e-09	0.00178206	0.965797	chr1	67518745	SLC35D1	Body	NA	NA
cg24981400	1.61274e-09	-0.00597924	0.558321	chr2	100047526	REV1;REV1	Body;Body	NA	NA
cg04330057	1.61909e-09	0.0067719	0.23453	chr6	16306377	ATXN1;ATXN1	3'UTR;3'UTR	NA	NA
cg16168723	1.62977e-09	0.00128017	0.328815	chr18	2571579	METTL4;NDC80;NDC80	TSS200;1stExon;5'UTR	NA	NA
cg11789444	1.63688e-09	0.00119137	0.153494	chr3	119814398	GSK3B;GSK3B	TSS1500;TSS1500	NA	NA
cg06157335	1.63765e-09	0.00140894	0.533219	chr1	53164003	C1orf163;C1orf163	5'UTR;1stExon	NA	NA
cg00302793	1.6418e-09	0.00146385	0.202239	chr4	102268125	PPP3CA;PPP3CA;PPP3CA;PPP3CA;PPP3CA;PPP3CA	1stExon;5'UTR;1stExon;5'UTR;5'UTR;1stExon	NA	NA
cg16317457	1.64295e-09	0.00644312	0.83643	chr11	123173103			NA	NA
cg21491967	1.64316e-09	0.00573344	0.536563	chr6	156276515			NA	NA
cg18748332	1.65754e-09	0.00110033	0.772058	chr12	54020076	ATF7;ATF7;ATF7;ATF7	5'UTR;5'UTR;1stExon;1stExon	NA	NA
cg10901633	1.66977e-09	-0.00429517	0.0965051	chr3	4814459	ITPR1;ITPR1;ITPR1	Body;Body;Body	NA	NA
cg07556018	1.67207e-09	-0.00467573	0.00211368	chr11	2677341	KCNQ1;KCNQ1OT1;KCNQ1	Body;Body;Body	NA	NA
cg08792677	1.67803e-09	0.00150597	0.539418	chr11	75379173	MAP6;MAP6	1stExon;1stExon	NA	NA
cg27455781	1.68202e-09	0.00336883	0.0660887	chr15	65647600	IGDCC3	Body	NA	NA
cg21148128	1.68386e-09	0.00115561	0.676888	chr6	135375750	HBS1L;HBS1L;HBS1L	Body;Body;Body	NA	NA
cg10177591	1.70379e-09	0.00130525	0.379364	chr6	43027482	KLC4;KLC4;KLC4;KLC4;MRPL2	TSS1500;5'UTR;TSS200;5'UTR;TSS1500	NA	NA
cg04498971	1.70576e-09	0.00141889	0.242318	chr17	56084468	SFRS1;SFRS1	1stExon;1stExon	NA	NA
cg24119607	1.71049e-09	-0.00527073	0.443926	chr5	139047739	CXXC5	5'UTR	NA	NA
cg09915703	1.71265e-09	0.00145546	0.840257	chr11	62599750	STX5	TSS200	NA	NA
cg13560200	1.72946e-09	0.00109417	0.924093	chr7	44646066	OGDH;OGDH;OGDH	TSS200;TSS200;TSS200	NA	NA
cg07018087	1.72964e-09	0.00252199	0.442533	chr5	170860508	FGF18	Body	NA	NA
cg05644480	1.73145e-09	0.0044678	0.652031	chr19	45418020	APOC1	5'UTR	NA	NA
cg08936794	1.73184e-09	0.00125036	0.281324	chr1	43833873	ELOVL1	TSS200	NA	NA
cg03734391	1.73233e-09	-0.00328716	0.257394	chr19	56182200	U2AF2;U2AF2	Body;Body	NA	NA
cg00327947	1.73305e-09	-0.00477881	0.117314	chr16	85482849			NA	NA
cg04347264	1.73503e-09	0.00658136	0.717337	chr10	135051313	VENTX	TSS200	NA	NA
cg16752400	1.73874e-09	0.0042061	0.644795	chr8	66131741			NA	NA
cg14029001	1.73976e-09	-0.00361612	0.0905835	chr6	41998500	CCND3;CCND3	5'UTR;5'UTR	NA	NA
cg18666075	1.74459e-09	0.00467677	0.803202	chr3	156833184			NA	NA
cg18179833	1.74804e-09	0.00142195	0.548593	chr5	112312951	DCP2	Body	NA	NA
cg00637802	1.7502e-09	0.00263978	0.381109	chr12	113590234	CCDC42B	Body	NA	NA
cg26360924	1.75797e-09	0.00562529	0.10334	chr1	118793005			NA	NA
cg09188980	1.7625e-09	0.00533842	0.42642	chr11	14993378	CALCA;CALCA;CALCA	5'UTR;5'UTR;5'UTR	NA	NA
cg08936785	1.76756e-09	0.00349765	0.326635	chr1	117452320	PTGFRN	TSS1500	NA	NA
cg19988880	1.76874e-09	0.00118282	0.653192	chr12	120315283	CIT	TSS200	NA	NA
cg18805835	1.77576e-09	0.00158746	0.592439	chr5	138775054	DNAJC18	Body	NA	NA
cg02538833	1.7824e-09	0.00418373	0.668713	chr1	9822207	CLSTN1;CLSTN1	Body;Body	NA	NA
cg04387475	1.78379e-09	0.00122054	0.141199	chr10	102747104	MRPL43;C10orf2;C10orf2;MRPL43;MRPL43;C10orf2;MRPL43;C10orf2	1stExon;TSS200;TSS200;1stExon;1stExon;TSS200;1stExon;TSS200	NA	NA
cg16990174	1.78671e-09	0.00635699	0.863838	chr3	72496875	RYBP	TSS1500	NA	NA
cg08457898	1.78711e-09	0.0019394	0.05483	chr19	15343786	EPHX3;EPHX3;EPHX3	5'UTR;TSS1500;1stExon	NA	NA
cg07378091	1.80778e-09	0.00128505	0.966546	chr19	12662277	ZNF564;ZNF564	1stExon;5'UTR	NA	NA
cg13365543	1.81008e-09	0.00153474	0.421945	chr11	9596475	WEE1;WEE1;WEE1	1stExon;Body;5'UTR	NA	NA
cg19370084	1.81478e-09	0.00182038	0.775725	chr12	125671504			NA	NA
cg00157359	1.81765e-09	0.00503641	0.920915	chr11	66233183	PELI3;PELI3	TSS1500;TSS1500	NA	NA
cg25264101	1.81915e-09	-0.0033595	0.645256	chr19	14064374	PODNL1;DCAF15;PODNL1	TSS200;Body;TSS200	NA	NA
cg27311092	1.82143e-09	0.00224982	0.34846	chr16	19142612			NA	NA
cg22956598	1.82218e-09	0.00120965	0.989105	chr17	13973019	COX10	Body	NA	NA
cg12069248	1.82875e-09	0.00136348	0.786474	chr11	65628378	MUS81	Body	NA	NA
cg09095222	1.832e-09	0.0012357	0.887157	chr3	157816094	SHOX2;SHOX2;SHOX2	Body;Body;Body	NA	NA
cg20824977	1.83287e-09	-0.00497051	0.646633	chr15	59978600	BNIP2	Body	NA	NA
cg13443592	1.83653e-09	-0.00413415	0.348264	chr10	43429755			NA	NA
cg24807850	1.83977e-09	0.00670961	0.494391	chr1	3165391	PRDM16;PRDM16	Body;Body	NA	NA
cg02102075	1.8411e-09	-0.00570617	0.419297	chr16	474430	RAB11FIP3	TSS1500	NA	NA
cg11789885	1.84361e-09	0.00646336	0.958231	chr19	11472731	LPPR2;LPPR2	Body;Body	NA	NA
cg22171829	1.84616e-09	0.00470772	0.11367	chr7	95225520	PDK4	1stExon	NA	NA
cg06649899	1.84652e-09	0.00139486	0.841877	chr16	67261154	TMEM208;LRRC29;LRRC29	Body;TSS1500;TSS1500	NA	NA
cg15370815	1.84727e-09	0.0012839	0.517864	chr11	108093335	NPAT;ATM;NPAT	5'UTR;TSS1500;1stExon	NA	NA
cg07615342	1.85803e-09	0.00119269	0.569306	chr3	45266820	TMEM158	1stExon	NA	NA
cg18454133	1.86035e-09	0.00434133	0.278722	chr14	23835870	EFS;EFS	TSS1500;TSS1500	NA	NA
cg00980581	1.86257e-09	0.00432043	0.906262	chr6	36238095	PNPLA1;PNPLA1;PNPLA1	5'UTR;5'UTR;TSS200	NA	NA
cg13770461	1.86369e-09	-0.00436788	0.430819	chr11	46016312	PHF21A;PHF21A	Body;Body	NA	NA
cg14178506	1.86389e-09	0.0014485	0.711355	chr19	23456575			NA	NA
cg13993914	1.87911e-09	-0.00492428	0.623834	chr9	140165710	COBRA1	Body	NA	NA
cg25213452	1.8858e-09	-0.00408443	0.89252	chr1	206630385	SRGAP2;SRGAP2	Body;Body	NA	NA
cg12996305	1.89233e-09	0.00155936	0.778143	chr17	2295923	MNT	Body	NA	NA
cg21605781	1.8951e-09	0.00577751	0.952521	chr12	105630720	APPL2	TSS1500	NA	NA
cg17186087	1.91626e-09	0.00432131	0.851457	chr2	232765416			NA	NA
cg03445287	1.919e-09	-0.00441529	0.685092	chr8	21823731	XPO7;XPO7;XPO7	TSS200;Body;Body	NA	NA
cg22810489	1.92406e-09	0.00339697	0.695956	chr19	45927585	ERCC1;ERCC1;ERCC1	TSS1500;TSS1500;TSS1500	NA	NA
cg05021842	1.92746e-09	0.0102429	0.801961	chr19	3464940			NA	NA
cg24220767	1.9316e-09	0.00124446	0.228169	chr4	186317793	ANKRD37	TSS200	NA	NA
cg00238994	1.9325e-09	0.00142677	0.817331	chr19	2977310	TLE6;TLE6	TSS1500;TSS1500	NA	NA
cg05699921	1.93462e-09	-0.0029932	0.960826	chr1	205286927	NUAK2	Body	NA	NA
cg17338821	1.93725e-09	-0.00453698	0.0276439	chr3	57995782	FLNB;FLNB;FLNB;FLNB	Body;Body;Body;Body	NA	NA
cg22033281	1.93737e-09	0.00433931	0.950295	chr11	111325754			NA	NA
cg01407900	1.93778e-09	0.0011326	0.918146	chr16	56965658	HERPUD1;HERPUD1;HERPUD1	TSS200;TSS200;TSS200	NA	NA
cg09726654	1.94119e-09	0.00300048	0.651448	chr2	158114268	GALNT5	TSS200	NA	NA
cg16236770	1.9425e-09	0.00102513	0.0215873	chr11	62573142	NXF1;NXF1	TSS200;TSS200	NA	NA
cg09418618	1.94802e-09	-0.00569284	0.782686	chr8	75266264	GDAP1;GDAP1	Body;Body	NA	NA
cg17879376	1.95138e-09	-0.00333053	0.306948	chr1	32212024	BAI2	Body	NA	NA
cg26349332	1.9527e-09	0.00139351	0.718812	chr9	37592199	TOMM5;TOMM5;TOMM5	Body;3'UTR;Body	NA	NA
cg01682285	1.95594e-09	0.00475524	0.261189	chr14	81422160	TSHR;TSHR;TSHR	1stExon;1stExon;1stExon	NA	NA
cg11038280	1.95619e-09	0.00125025	0.935822	chr7	92466132	CDK6	TSS200	NA	NA
cg12883980	1.96078e-09	0.00340687	0.907928	chr13	50707586			NA	NA
cg08461772	1.97387e-09	0.00538988	0.380141	chr7	95026248	PON3	TSS1500	NA	NA
cg24260323	1.9773e-09	-0.00432044	0.206019	chr15	47497566			NA	NA
cg10533282	1.97905e-09	0.00138869	0.385753	chr15	99602454			NA	NA
cg05591758	1.98263e-09	0.00116591	0.577993	chr2	74685531	WBP1	TSS200	NA	NA
cg04731988	2.00427e-09	-0.0063676	0.794196	chr20	3051954	OXT	TSS1500	NA	NA
cg25840210	2.00595e-09	0.00151128	0.713016	chr13	45152287			NA	NA
cg08683249	2.00858e-09	0.00437517	0.501362	chr6	43612627	RSPH9	TSS200	NA	NA
cg24123198	2.01059e-09	0.00507335	0.618009	chr4	184018031			NA	NA
cg15843331	2.01588e-09	-0.00343141	0.110073	chr11	61063144	VWCE	TSS1500	NA	NA
cg10789050	2.0199e-09	-0.00662837	0.34225	chr3	31713847	OSBPL10	Body	NA	NA
cg02036581	2.02336e-09	0.00121041	0.597231	chr19	1267269			NA	NA
cg20287514	2.02779e-09	0.00418522	0.103878	chr1	25869837	LDLRAP1	TSS1500	NA	NA
cg26163284	2.02964e-09	-0.00288571	0.658475	chr19	42787174			NA	NA
cg08356262	2.03178e-09	-0.00558073	0.399763	chr5	75838704	IQGAP2	Body	NA	NA
cg06193393	2.03312e-09	0.00137517	0.832257	chr7	99869454	GATS;GATS;GATS;GATS	Body;Body;Body;Body	NA	NA
cg26247064	2.0391e-09	-0.00559321	0.0261493	chr11	74466198	RNF169	Body	NA	NA
cg11177833	2.04057e-09	0.00390309	0.206308	chr17	4692377	GLTPD2	1stExon	NA	NA
cg24980765	2.0497e-09	-0.00581502	0.562896	chr3	122378918			NA	NA
cg11425280	2.05105e-09	0.00116371	0.236205	chr12	104851172	CHST11	5'UTR	NA	NA
cg21399717	2.06136e-09	0.00386726	0.369068	chr8	102263157			NA	NA
cg27200267	2.06172e-09	0.00406344	0.575191	chr12	1726059	WNT5B	TSS200	NA	NA
cg25198784	2.06192e-09	0.00115265	0.123602	chr6	99963468	USP45	TSS1500	NA	NA
cg09549591	2.06488e-09	0.00473117	0.594055	chr11	11523491	GALNTL4	Body	NA	NA
cg20612002	2.0692e-09	0.00131438	0.924099	chr15	48470256	MYEF2	Body	NA	NA
cg19653589	2.07044e-09	-0.00342736	0.175608	chr19	2614177	GNG7	5'UTR	NA	NA
cg00552704	2.07145e-09	0.00470498	0.414475	chr6	32121420	PPT2;PPT2	TSS1500;Body	NA	NA
cg04157161	2.07211e-09	0.00819151	0.37686	chr17	7906847	GUCY2D	Body	NA	NA
cg10700334	2.08482e-09	0.00157016	0.622544	chr3	118753610	IGSF11;IGSF11;IGSF11	5'UTR;1stExon;Body	NA	NA
cg18502630	2.0859e-09	-0.00274593	0.530399	chr9	139871955	PTGDS;PTGDS	5'UTR;1stExon	NA	NA
cg05151228	2.09356e-09	0.00147571	0.713061	chr1	110752952	KCNC4;KCNC4;KCNC4	TSS1500;TSS1500;TSS1500	NA	NA
cg02760293	2.10114e-09	0.00668003	0.477878	chr5	146258785	PPP2R2B;PPP2R2B;PPP2R2B;PPP2R2B;PPP2R2B;PPP2R2B;PPP2R2B	5'UTR;Body;5'UTR;TSS1500;Body;TSS1500;TSS1500	NA	NA
cg15961693	2.10141e-09	0.0041834	0.438749	chr6	139689053			NA	NA
cg13647973	2.10775e-09	0.00775419	0.863976	chr19	56061337			NA	NA
cg06442489	2.10907e-09	-0.00463518	0.522816	chr19	58630612	ZSCAN18;ZSCAN18	TSS1500;TSS1500	-6.62	7.2e-11
cg02598224	2.11225e-09	0.0017305	0.938829	chr2	97001430	NCAPH	TSS200	NA	NA
cg10575219	2.11937e-09	-0.00521127	0.23043	chr7	105313992	ATXN7L1;ATXN7L1	Body;5'UTR	NA	NA
cg14737592	2.1195e-09	0.00131735	0.676064	chr12	57914238	DDIT3;DDIT3	1stExon;5'UTR	NA	NA
cg25565476	2.1258e-09	0.00485678	0.583455	chr7	106270744			NA	NA
cg15721359	2.12862e-09	-0.00471698	0.743175	chr13	52699305	NEK5	Body	NA	NA
cg15235185	2.13229e-09	0.00142576	0.120858	chr1	193028809	TROVE2;TROVE2;TROVE2;UCHL5;TROVE2	TSS200;TSS200;1stExon;TSS1500;5'UTR	NA	NA
cg06489653	2.13621e-09	0.00149233	0.294842	chr2	99061716	INPP4A;INPP4A;INPP4A;INPP4A	5'UTR;5'UTR;5'UTR;5'UTR	NA	NA
cg05562817	2.14112e-09	0.0017197	0.843915	chr19	51871466	CLDND2	Body	NA	NA
cg03670158	2.14484e-09	0.00137025	0.570141	chr17	41323431	NBR1;NBR1;NBR1	5'UTR;5'UTR;5'UTR	NA	NA
cg15131784	2.14585e-09	0.00108132	0.723309	chr3	139108705	COPB2;COPB2	TSS200;TSS200	NA	NA
cg26644674	2.15134e-09	-0.00569777	0.230553	chr10	3138505	PFKP	Body	NA	NA
cg17066620	2.15386e-09	0.00128407	0.885756	chr22	37882518	MFNG;MFNG;MFNG	TSS200;TSS200;TSS200	NA	NA
cg21904489	2.1575e-09	0.00405715	0.994344	chr3	119071213	CDGAP	Body	NA	NA
cg25605289	2.16617e-09	0.00339574	0.489888	chr1	151974222			NA	NA
cg00883212	2.16931e-09	0.0039911	0.168698	chr2	173795201	RAPGEF4;RAPGEF4	Body;Body	NA	NA
cg06513659	2.17871e-09	0.00142416	0.822371	chr17	74448689	AANAT;UBE2O	TSS1500;Body	NA	NA
cg01618834	2.18925e-09	0.00113001	0.996192	chr6	31633788	CSNK2B;BAT4;CSNK2B	1stExon;TSS1500;5'UTR	NA	NA
cg17499941	2.19356e-09	0.0046004	0.487306	chr5	87975812	LOC645323	Body	NA	NA
cg09868597	2.20315e-09	0.00134725	0.295401	chr5	112849442	YTHDC2;YTHDC2	1stExon;5'UTR	NA	NA
cg07223240	2.2127e-09	-0.00880522	0.845609	chr6	170468271			NA	NA
cg17839611	2.22288e-09	-0.00310013	0.733986	chr17	47286802	ABI3;ABI3;GNGT2	TSS1500;TSS1500;TSS200	NA	NA
cg13359765	2.22346e-09	0.00465426	0.407887	chr1	234350988	SLC35F3	Body	NA	NA
cg22398616	2.22553e-09	0.00485397	0.092764	chr13	53314203	LECT1;LECT1	TSS1500;TSS1500	NA	NA
cg10184431	2.24072e-09	0.00502566	0.873987	chr6	27783226	HIST1H2AJ;HIST1H2BM;HIST1H2BM	TSS1500;3'UTR;1stExon	NA	NA
cg13626632	2.24605e-09	-0.00440921	0.0895097	chr9	124131165	STOM;STOM	Body;Body	NA	NA
cg04088152	2.24695e-09	-0.00583767	0.763161	chr1	6062462			NA	NA
cg06690760	2.27511e-09	0.00126209	0.692938	chr3	71631298	FOXP1;FOXP1	5'UTR;5'UTR	NA	NA
cg05175466	2.27926e-09	0.000968592	0.470185	chr13	52586483	ALG11;ATP7B;ATP7B	TSS200;TSS1500;TSS1500	NA	NA
cg04052570	2.28333e-09	0.00153291	0.147923	chr14	88459528	GALC;GALC;GALC;GALC	1stExon;5'UTR;1stExon;5'UTR	NA	NA
cg02108176	2.2844e-09	0.00136214	0.692068	chr1	22109593	USP48;USP48;USP48;USP48	5'UTR;5'UTR;1stExon;1stExon	NA	NA
cg06894381	2.28519e-09	0.00128657	0.381061	chr1	67519805	SLC35D1;SLC35D1	1stExon;5'UTR	NA	NA
cg15783941	2.29596e-09	0.00627837	0.893264	chr19	13132221	NFIX	Body	NA	NA
cg01045622	2.29804e-09	0.00132424	0.999848	chr10	79686064	LOC100128292;DLG5	TSS1500;1stExon	NA	NA
cg16322208	2.30245e-09	0.00131421	0.380503	chr19	2151722	AP3D1;AP3D1	TSS200;TSS200	NA	NA
cg09220816	2.30705e-09	0.00135682	0.879849	chr16	30546310	ZNF747	TSS200	NA	NA
cg26804891	2.31012e-09	-0.00429404	0.10224	chr16	2055242	ZNF598	Body	NA	NA
cg27246744	2.31931e-09	-0.00501414	0.831022	chr3	31746590	OSBPL10	Body	NA	NA
[truncated: 2,302 more rows]

## Sheet: Supp Table 4
Conditional analysis within 3,550 distinct loci associated with gestational age.
ProbeID of Index DMP	EWAS of gestational age (weeks) P-value	Chr	Pos	ProbeID of Secondary DMP	EWAS of gestational age (weeks) adjusted for index DMP
					P-value	Regression coefficient
cg11932158	2.34569e-57	chr3	155422129	cg18623216	0.0557629	-0.00122456
cg11932158	2.34569e-57	chr3	155422129	cg23541926	2.23004e-08	-0.0070103
cg11932158	2.34569e-57	chr3	155422129	cg26690511	2.31751e-05	-0.00515174
cg11932158	2.34569e-57	chr3	155422129	cg07480762	0.0442823	-0.00278354
cg02001279	5.85567e-52	chr19	940967	cg18598117	9.88552e-05	-0.00385025
cg02001279	5.85567e-52	chr19	940967	cg12713583	0.000471101	-0.00381227
cg02001279	5.85567e-52	chr19	940967	cg02466798	0.00611982	-0.00231871
cg04685228	4.89887e-48	chr5	172462626	-	-	-
cg08817867	6.81838e-46	chr17	19656554	-	-	-
cg16103712	7.26986e-46	chr8	99023869	-	-	-
cg20334115	5.86559e-44	chr1	226107899	-	-	-
cg02430430	8.65336e-43	chr15	74532450	-	-	-
cg08943494	1.04429e-41	chr11	36422615	cg00220721	0.549334	0.000470864
cg08943494	1.04429e-41	chr11	36422615	cg22117805	0.189301	-0.00157624
cg08943494	1.04429e-41	chr11	36422615	cg07136133	0.0416268	0.00201704
cg08943494	1.04429e-41	chr11	36422615	cg18520238	0.00147023	0.00357725
cg04347477	1.75809e-41	chr12	125002007	cg22828383	0.0390728	-0.00239967
cg04347477	1.75809e-41	chr12	125002007	cg22820108	9.78282e-06	-0.00380076
cg04347477	1.75809e-41	chr12	125002007	cg15085899	0.0127532	-0.00472488
cg20068209	2.00248e-41	chr6	75988568	-	-	-
cg01154283	6.93379e-40	chr2	36603543	-	-	-
cg01394781	1.35716e-37	chr16	16214213	-	-	-
cg07738730	2.99548e-37	chr17	47077165	cg18183624	8.71401e-06	0.00483611
cg07738730	2.99548e-37	chr17	47077165	cg22434594	1.96129e-05	0.00277611
cg26077811	3.22628e-36	chr11	119232263	-	-	-
cg13066703	3.68375e-36	chr1	211526705	-	-	-
cg17133774	6.14154e-36	chr1	6198667	-	-	-
cg08726900	1.58394e-34	chr16	89550474	-	-	-
cg00889363	1.65297e-34	chr2	206255841	-	-	-
cg04730825	2.31056e-34	chr16	16116191	-	-	-
cg27295118	4.63837e-34	chr14	22902226	cg17313709	0.0707912	-0.00181009
cg13924996	5.11463e-34	chr11	67053829	cg08670658	4.12652e-07	-0.00461852
cg13924996	5.11463e-34	chr11	67053829	cg11436362	0.530741	-0.000592884
cg13924996	5.11463e-34	chr11	67053829	cg11973132	0.00146954	-0.00308702
cg13924996	5.11463e-34	chr11	67053829	cg14276125	0.0200012	-0.0022607
cg16356456	5.80237e-34	chr7	73720870	cg23062810	1.4806e-06	-0.00358449
cg16356456	5.80237e-34	chr7	73720870	cg11573518	0.170393	-0.000928428
cg13492133	2.06404e-33	chr1	183516266	-	-	-
cg05294455	3.69792e-33	chr17	45286609	cg09299082	0.257523	0.000828801
cg05969150	3.97195e-33	chr16	72882495	-	-	-
cg07835443	2.22024e-32	chr16	89734986	cg16725984	0.0534138	-0.00200659
cg27518892	4.92327e-32	chr16	57566936	cg04276536	1.74545e-12	-0.00427322
cg27518892	4.92327e-32	chr16	57566936	cg01104250	0.000146855	-0.0044149
cg10020892	1.1681e-30	chr1	147016901	-	-	-
cg21155834	4.15411e-30	chr2	149282209	-	-	-
cg11360522	4.39935e-30	chr13	113379828	-	-	-
cg04521626	7.31146e-30	chr17	4714200	-	-	-
cg23482898	1.64687e-29	chr3	12858887	cg11882607	2.37128e-11	-0.00509165
cg12970171	1.76554e-29	chr5	6766613	-	-	-
cg04213841	1.85104e-29	chr13	49792685	cg05077231	9.40049e-09	0.00498761
cg04213841	1.85104e-29	chr13	49792685	cg06396119	1.37648e-05	0.00459366
cg04213841	1.85104e-29	chr13	49792685	cg07447742	6.87496e-05	0.00387186
cg04213841	1.85104e-29	chr13	49792685	cg20798249	0.0021078	0.00266349
cg05283597	3.57148e-29	chr3	52812410	cg25938530	0.029519	0.00261782
cg02017450	5.94752e-29	chr10	10631670	-	-	-
cg19913563	1.96907e-28	chr6	30720261	-	-	-
cg04494800	6.41649e-28	chr6	149775853	-	-	-
cg06870470	6.92671e-28	chr19	11315767	-	-	-
cg04272820	1.48166e-27	chr17	38228538	cg20717932	1.21468e-05	-0.00486077
cg21926626	1.81229e-27	chr8	143382226	-	-	-
cg24024661	3.67636e-27	chr19	1074425	cg02753354	9.70067e-06	-0.00302994
cg24024661	3.67636e-27	chr19	1074425	cg10714639	2.77783e-05	-0.0051042
cg24024661	3.67636e-27	chr19	1074425	cg17924072	1.23803e-06	-0.00412351
cg11873462	1.71401e-26	chr8	144611940	-	-	-
cg02571874	1.90688e-26	chr3	12799985	-	-	-
cg11854981	1.92297e-26	chr6	42219847	-	-	-
cg24296397	3.7542e-26	chr3	49692537	-	-	-
cg22000727	7.44932e-26	chr6	3459199	-	-	-
cg03930153	8.04714e-26	chr3	176868896	-	-	-
cg05581878	1.66075e-25	chr3	159886981	-	-	-
cg09915396	1.84681e-25	chr17	2907895	cg15030415	3.13864e-08	-0.0046367
cg09915396	1.84681e-25	chr17	2907895	cg00739778	1.05288e-08	-0.00588316
cg09915396	1.84681e-25	chr17	2907895	cg01076459	3.94584e-09	-0.00463527
cg09915396	1.84681e-25	chr17	2907895	cg14999189	2.48093e-05	-0.00346714
cg10397819	2.53355e-25	chr14	75447512	cg14171369	1.94597e-05	0.0038318
cg10397819	2.53355e-25	chr14	75447512	cg00679184	0.0115096	0.00223749
cg07810039	3.22537e-25	chr1	218524558	-	-	-
cg20076442	3.23318e-25	chr8	72745197	-	-	-
cg27652459	3.46568e-25	chr11	46709238	-	-	-
cg08576185	4.04576e-25	chr16	2055684	cg05211189	0.0181051	-0.00240583
cg08576185	4.04576e-25	chr16	2055684	cg26804891	0.000399656	-0.0026107
cg04902474	4.08088e-25	chr1	33233473	-	-	-
cg23009780	4.42393e-25	chr2	96774492	-	-	-
cg21374307	6.01202e-25	chr3	159547539	-	-	-
cg06472341	7.75951e-25	chr11	1073641	-	-	-
cg27471246	9.25851e-25	chr21	39776434	-	-	-
cg23889047	1.02334e-24	chr1	7705756	-	-	-
cg26027170	1.03282e-24	chr17	37394705	-	-	-
cg02637282	1.27746e-24	chr12	98768240	-	-	-
cg03047995	1.54583e-24	chr14	24601588	cg20306574	0.00012109	-0.00313981
cg03047995	1.54583e-24	chr14	24601588	cg13167816	0.0187998	-0.00144933
cg03619256	2.85628e-24	chr7	105515219	-	-	-
cg10535320	4.5095e-24	chr17	61908869	-	-	-
cg27448161	4.58964e-24	chr12	53472792	-	-	-
cg13283635	6.81383e-24	chr20	61450653	-	-	-
cg05820066	7.10847e-24	chr16	75145843	cg03485667	6.13144e-16	-0.00668146
cg05820066	7.10847e-24	chr16	75145843	cg03602233	1.27718e-07	-0.0037836
cg07338715	1.00139e-23	chr2	109649281	-	-	-
cg25362050	1.34537e-23	chr17	38470900	cg00442282	1.36181e-07	-0.00287119
cg25362050	1.34537e-23	chr17	38470900	cg15803221	3.121e-07	0.00498263
cg18897025	1.50436e-23	chr5	110413671	cg20710777	1.65647e-05	-0.00329921
cg25363679	1.99144e-23	chr12	71031202	-	-	-
cg15908709	2.50186e-23	chr17	46676215	cg01324550	1.20392e-05	0.00322813
cg15908709	2.50186e-23	chr17	46676215	cg08832695	0.0423292	0.00144095
cg15908709	2.50186e-23	chr17	46676215	cg02086493	0.000110986	0.00104677
cg11934771	2.75612e-23	chr6	31021796	cg20112500	0.00151384	-0.00197254
cg11934771	2.75612e-23	chr6	31021796	cg14119792	1.20573e-05	-0.004422
cg18608055	3.12827e-23	chr19	1130866	cg12170787	0.0533189	-0.00130812
cg18608055	3.12827e-23	chr19	1130866	cg07573872	0.00171771	-0.00339656
cg19439123	4.68178e-23	chr17	17687621	cg01429256	1.80373e-07	-0.00349977
cg00481600	4.71896e-23	chr15	65503829	cg11093760	3.46759e-07	-0.00318023
cg00481600	4.71896e-23	chr15	65503829	cg04813911	0.000526876	-0.00183361
cg01229865	5.11929e-23	chr13	113528751	cg07770777	0.00350576	-0.00353176
cg03940776	5.73043e-23	chr6	158490013	-	-	-
cg13100137	7.02583e-23	chr1	37937945	cg13423759	0.0010729	-0.00364314
cg13100137	7.02583e-23	chr1	37937945	cg24635860	9.08618e-05	-0.00503919
cg01194073	1.48438e-22	chr14	101175302	cg18684879	0.0457175	0.002221
cg04632887	1.55689e-22	chr20	3065559	cg16536918	2.02029e-05	-0.00401365
cg04632887	1.55689e-22	chr20	3065559	cg23169111	0.000947705	-0.00185906
cg04632887	1.55689e-22	chr20	3065559	cg25551168	0.00474079	-0.00218592
cg04632887	1.55689e-22	chr20	3065559	cg24257309	0.0537098	-0.00154971
cg23385718	1.73488e-22	chr7	18127029	cg10068437	7.31099e-06	0.00268911
cg23385718	1.73488e-22	chr7	18127029	cg06962918	0.0374175	0.00182664
cg15013617	2.08832e-22	chr20	2795378	cg13672800	2.04599e-08	-0.004247
cg15013617	2.08832e-22	chr20	2795378	cg01143454	4.43157e-07	-0.00496713
cg15013617	2.08832e-22	chr20	2795378	cg18157896	0.0009221	-0.00281521
cg20258698	2.49523e-22	chr7	47556811	-	-	-
cg15659420	2.60737e-22	chr11	20034979	-	-	-
cg27184903	3.58903e-22	chr15	29285727	-	-	-
cg12036735	3.97538e-22	chr8	20169916	-	-	-
cg03048432	5.62622e-22	chr14	51290751	cg20033652	0.00158479	-0.00239351
cg00989249	6.00505e-22	chr5	177548398	cg17796323	0.0180161	-0.00251756
cg00989249	6.00505e-22	chr5	177548398	cg02659217	0.0105283	-0.00135025
cg13036381	6.0149e-22	chr3	159942495	cg03281561	0.805403	-0.000202656
cg00086710	6.93675e-22	chr4	89204074	-	-	-
cg13447080	7.48273e-22	chr8	131054408	-	-	-
cg08610901	7.64633e-22	chr7	3186766	cg04945216	0.439965	0.000760233
cg24166457	9.75157e-22	chr19	45590882	-	-	-
cg01185345	1.04687e-21	chr13	99218287	-	-	-
cg07398517	1.09148e-21	chr3	30327579	-	-	-
cg16834726	1.12895e-21	chr12	57937408	cg11087358	2.46199e-07	0.00122257
cg08915038	1.24885e-21	chr1	16562923	cg05588972	2.65989e-08	0.00148515
cg10713589	1.56748e-21	chr4	119989952	-	-	-
cg12064202	1.74792e-21	chr6	31038842	cg22786748	1.39398e-10	0.00597559
cg12064202	1.74792e-21	chr6	31038842	cg16519217	0.000557686	0.00286748
cg02571436	1.91974e-21	chr10	77468337	-	-	-
cg14997707	2.11055e-21	chr7	93853120	-	-	-
cg15690760	2.16826e-21	chr5	6729662	-	-	-
cg22867816	3.05519e-21	chr4	16081205	cg07656173	0.00018641	-0.00500688
cg22867816	3.05519e-21	chr4	16081205	cg13117948	8.78975e-05	-0.00432799
cg08654091	3.24268e-21	chr1	227015418	-	-	-
cg02137956	3.2898e-21	chr7	157092982	-	-	-
cg20294319	3.35677e-21	chr13	47253842	-	-	-
cg19103429	3.60234e-21	chr7	92460784	cg10481072	2.00639e-07	-0.00427407
cg19103429	3.60234e-21	chr7	92460784	cg02689293	3.45444e-06	0.00108907
cg19233405	3.83518e-21	chr1	154988721	-	-	-
cg26269677	4.54874e-21	chr5	76251688	cg21842274	8.75292e-08	-0.00539692
cg26269677	4.54874e-21	chr5	76251688	cg16545105	6.31097e-08	-0.00482895
cg26269677	4.54874e-21	chr5	76251688	cg06495038	2.66048e-05	-0.00330812
cg12629515	4.7504e-21	chr6	27859811	cg23504411	0.00555265	0.00214076
cg19075787	5.49939e-21	chr2	105372087	cg22365240	0.000456521	-0.00297641
cg08731696	5.87331e-21	chr1	59280489	cg02951357	0.000147845	0.00205814
cg08731696	5.87331e-21	chr1	59280489	cg20593826	6.74916e-06	0.0047542
cg08731696	5.87331e-21	chr1	59280489	cg17826530	0.0139331	0.00237318
cg14527110	6.42462e-21	chr5	131561292	-	-	-
cg03295554	6.70128e-21	chr11	128395450	cg26503877	2.55272e-07	-0.00480849
cg03295554	6.70128e-21	chr11	128395450	cg11588197	0.000362492	-0.00408199
cg18681014	7.02158e-21	chr14	105660876	-	-	-
cg08217545	9.37379e-21	chr19	3388013	cg22603569	0.211083	-0.00108954
cg00382138	1.26668e-20	chr4	110723299	-	-	-
cg07144984	2.44753e-20	chr3	114864747	-	-	-
cg09982224	2.594e-20	chr11	67775972	cg06518251	1.76621e-09	-0.0039491
cg04313735	3.0126e-20	chr11	73357194	cg24261333	2.16877e-07	0.00369243
cg04313735	3.0126e-20	chr11	73357194	cg02254407	4.2156e-08	0.00535648
cg04313735	3.0126e-20	chr11	73357194	cg07013104	9.99344e-07	0.00328276
cg04313735	3.0126e-20	chr11	73357194	cg26776957	3.53731e-05	0.0034598
cg04313735	3.0126e-20	chr11	73357194	cg24176731	1.29387e-07	0.00490167
cg04313735	3.0126e-20	chr11	73357194	cg11512608	7.69333e-05	0.00337947
cg04313735	3.0126e-20	chr11	73357194	cg25288155	0.000892673	0.00269267
cg06897661	3.49359e-20	chr16	50322074	cg23580000	0.00448622	-0.00263193
cg19169154	3.86269e-20	chr17	19287978	cg10351914	1.1525e-07	0.00292691
cg10239319	4.43582e-20	chr4	6073656	-	-	-
cg20156985	4.91117e-20	chr1	33694609	-	-	-
cg07638500	4.93549e-20	chr3	123371420	-	-	-
cg14387452	6.16859e-20	chr9	20512334	-	-	-
cg19744173	8.40602e-20	chr2	112913178	-	-	-
cg17178761	8.44524e-20	chr17	55682851	-	-	-
cg07985890	8.48831e-20	chr11	65190999	cg09411730	0.4533	-0.000752982
cg07985890	8.48831e-20	chr11	65190999	cg23523668	2.13424e-05	-0.00355103
cg07985890	8.48831e-20	chr11	65190999	cg12155547	1.19153e-05	-0.00362254
cg07985890	8.48831e-20	chr11	65190999	cg02345399	2.78859e-07	-0.00343956
cg07985890	8.48831e-20	chr11	65190999	cg03249011	7.51367e-08	-0.00504519
cg07985890	8.48831e-20	chr11	65190999	cg15920975	0.00047934	-0.00282538
cg07985890	8.48831e-20	chr11	65190999	cg11352146	0.000750879	-0.00101954
cg07985890	8.48831e-20	chr11	65190999	cg18019132	0.990554	7.25777e-06
cg10728351	1.09129e-19	chr4	122628020	-	-	-
cg10343364	1.12961e-19	chr16	3559568	cg09934892	0.350266	-0.000591515
cg10343364	1.12961e-19	chr16	3559568	cg02177950	1.06706e-07	-0.00505763
cg07749613	1.54146e-19	chr2	97073539	-	-	-
cg26024874	1.75058e-19	chr18	54541128	-	-	-
cg03074244	1.99746e-19	chr11	118213414	-	-	-
cg14214856	2.02418e-19	chr10	36965362	-	-	-
cg12999267	2.43244e-19	chr12	94376970	-	-	-
cg15967278	2.54944e-19	chr8	29886272	-	-	-
cg05660874	2.66808e-19	chr19	2332485	cg10723746	0.171008	-0.000754323
cg05660874	2.66808e-19	chr19	2332485	cg25533220	1.74316e-09	0.00122659
cg24914185	2.90328e-19	chr2	200663789	-	-	-
cg07408552	3.43125e-19	chr17	40611995	-	-	-
cg19136673	4.27425e-19	chr6	32813337	cg16890093	3.96506e-08	-0.00323891
cg19136673	4.27425e-19	chr6	32813337	cg01309328	1.04471e-05	-0.00405552
cg06245338	4.83232e-19	chr17	74410839	-	-	-
cg06832008	5.16759e-19	chr6	105401339	cg09039890	2.91547e-07	0.00248226
cg26049998	5.41892e-19	chr17	65602730	-	-	-
cg09233395	5.91295e-19	chr8	116678582	-	-	-
cg10493186	7.80684e-19	chr1	3134756	-	-	-
cg25426302	8.7973e-19	chr6	32120826	cg17113856	0.0204735	0.00195365
cg25426302	8.7973e-19	chr6	32120826	cg11386011	0.00119513	0.00260329
cg25426302	8.7973e-19	chr6	32120826	cg02956248	0.101778	0.00203498
cg25426302	8.7973e-19	chr6	32120826	cg01111041	0.00271793	0.00282808
cg25426302	8.7973e-19	chr6	32120826	cg04749507	0.0055847	0.00187111
cg25426302	8.7973e-19	chr6	32120826	cg13102294	4.33506e-05	0.00319267
cg25426302	8.7973e-19	chr6	32120826	cg12585943	0.000163821	0.00251039
cg25426302	8.7973e-19	chr6	32120826	cg06108383	0.446025	0.000604363
cg25426302	8.7973e-19	chr6	32120826	cg23359665	0.878045	0.000172928
cg25426302	8.7973e-19	chr6	32120826	cg20328456	0.146333	0.00131054
cg25426302	8.7973e-19	chr6	32120826	cg20914572	6.5319e-05	0.00247268
cg25426302	8.7973e-19	chr6	32120826	cg04105091	0.000511973	0.00220041
cg25426302	8.7973e-19	chr6	32120826	cg05985317	0.0011975	0.00177022
cg25426302	8.7973e-19	chr6	32120826	cg16481280	0.445238	0.000630343
cg25426302	8.7973e-19	chr6	32120826	cg00110832	0.0100136	0.00176779
cg25426302	8.7973e-19	chr6	32120826	cg19048176	0.108094	0.0010535
cg25426302	8.7973e-19	chr6	32120826	cg03570994	0.0254098	0.00152638
cg25426302	8.7973e-19	chr6	32120826	cg15078061	0.00259538	0.00249783
cg25426302	8.7973e-19	chr6	32120826	cg00552704	0.000471383	0.00273016
cg25426302	8.7973e-19	chr6	32120826	cg05767720	0.0188716	0.00215922
cg25426302	8.7973e-19	chr6	32120826	cg06025456	0.884947	0.00016759
cg25426302	8.7973e-19	chr6	32120826	cg13934406	0.736091	0.000386666
cg25426302	8.7973e-19	chr6	32120826	cg06814287	0.555632	0.000481784
cg25426302	8.7973e-19	chr6	32120826	cg06264679	0.00938007	0.00217261
cg25426302	8.7973e-19	chr6	32120826	cg10551329	0.79139	0.000283041
cg22761205	8.80298e-19	chr11	457256	cg24247537	5.79256e-05	-0.00395947
cg22761205	8.80298e-19	chr11	457256	cg24420089	1.91242e-05	-0.00377727
cg20229014	8.93018e-19	chr8	134529378	-	-	-
cg09888330	1.16653e-18	chr1	156786010	-	-	-
cg04549583	1.36944e-18	chr2	12146219	-	-	-
cg19723805	1.6143e-18	chr5	33147539	-	-	-
cg14377059	1.79762e-18	chr1	59183881	-	-	-
cg09121543	1.82344e-18	chr17	61774794	cg04380519	1.25084e-09	0.0013549
cg10549018	1.83231e-18	chr10	98176740	-	-	-
cg21228424	1.83743e-18	chr6	42678314	-	-	-
cg24279744	2.14218e-18	chr3	10408402	-	-	-
cg01930719	2.34272e-18	chr16	67575562	-	-	-
cg27106909	2.38389e-18	chr16	30106897	cg16348385	0.00125399	-0.00228013
cg27106909	2.38389e-18	chr16	30106897	cg26709300	0.00539593	-0.00241824
cg07807026	3.07348e-18	chr12	2041581	-	-	-
cg23235671	3.63568e-18	chr2	128617901	-	-	-
cg01894038	3.68076e-18	chr11	77741873	-	-	-
cg09091752	3.98412e-18	chr15	41080358	-	-	-
cg24746726	4.40482e-18	chr4	70726093	-	-	-
cg00522276	4.67722e-18	chr8	67452722	-	-	-
cg17837526	4.83695e-18	chr5	172410489	-	-	-
cg14905320	5.00642e-18	chr4	79339096	-	-	-
cg21081878	5.05387e-18	chr21	38334730	-	-	-
cg27140633	5.16911e-18	chr11	63685905	cg14319451	1.48176e-06	0.00370784
cg17149103	5.48089e-18	chr1	147789480	-	-	-
cg12342675	5.99619e-18	chr10	60411127	-	-	-
cg22539182	6.17415e-18	chr10	850393	-	-	-
cg19576697	6.28152e-18	chr5	176837920	-	-	-
cg26607031	6.82569e-18	chr1	9602701	-	-	-
cg15403198	6.93183e-18	chr6	41410759	-	-	-
cg04999352	7.55077e-18	chr11	63304614	-	-	-
cg27281690	7.81634e-18	chr2	7171963	cg13464573	0.000120967	-0.00242744
cg27281690	7.81634e-18	chr2	7171963	cg05087455	2.16836e-06	-0.00288824
cg27281690	7.81634e-18	chr2	7171963	cg19240637	1.02218e-06	-0.00397571
cg26926221	7.81681e-18	chr6	144698834	-	-	-
cg07651048	8.0532e-18	chr12	49735444	-	-	-
cg25702652	8.0805e-18	chr2	164204628	cg23948843	8.64043e-05	0.0026619
cg25702652	8.0805e-18	chr2	164204628	cg19402991	0.0603701	0.0017351
cg25702652	8.0805e-18	chr2	164204628	cg03662049	0.0984319	0.00136579
cg22784595	8.56505e-18	chr10	7455714	cg06220761	0.00843044	0.00260152
cg22784595	8.56505e-18	chr10	7455714	cg03237648	8.19584e-08	0.00161624
cg22784595	8.56505e-18	chr10	7455714	cg26978668	4.69349e-06	0.001427
cg15961007	8.57236e-18	chr6	153023279	cg02830467	6.59581e-07	-0.00441208
cg26224354	8.73708e-18	chr7	1096374	cg20603222	0.000930194	-0.00246815
cg16151538	8.83299e-18	chr20	33676388	-	-	-
cg23005885	9.44173e-18	chr15	90543450	cg19925872	0.0123488	0.00195524
cg23005885	9.44173e-18	chr15	90543450	cg21109038	0.480778	0.000599857
cg23005885	9.44173e-18	chr15	90543450	cg14023999	0.070195	0.00134864
cg23005885	9.44173e-18	chr15	90543450	cg01185080	0.000272983	0.00258042
cg02992639	1.17549e-17	chr1	155098827	cg10861146	6.017e-05	0.00148783
cg02992639	1.17549e-17	chr1	155098827	cg07207669	9.72532e-08	-0.00525771
cg02992639	1.17549e-17	chr1	155098827	cg05082095	2.24587e-06	0.00113506
cg20889322	1.26324e-17	chr11	65196622	-	-	-
cg18951352	1.32246e-17	chr6	149806077	cg18082788	1.1043e-07	-0.00482757
cg18951352	1.32246e-17	chr6	149806077	cg17501395	1.34597e-06	-0.00379121
cg18951352	1.32246e-17	chr6	149806077	cg09678939	0.0316353	-0.0016409
cg18951352	1.32246e-17	chr6	149806077	cg13136655	0.00602194	-0.00191569
cg09168805	1.3242e-17	chr1	94514548	-	-	-
cg10357314	1.5269e-17	chr11	94886261	-	-	-
cg25953130	1.54893e-17	chr10	63753550	-	-	-
cg26203136	1.64944e-17	chr7	739057	-	-	-
cg20782117	1.65812e-17	chr7	95865631	-	-	-
cg02152631	1.73194e-17	chr8	29133647	-	-	-
cg21932231	1.93635e-17	chr2	36668864	-	-	-
cg12587615	2.13378e-17	chr19	11472397	cg08326019	0.927462	-8.16556e-05
cg12587615	2.13378e-17	chr19	11472397	cg18365406	0.488139	-0.000576474
cg12587615	2.13378e-17	chr19	11472397	cg11789885	0.701953	0.00031546
cg09772299	2.21452e-17	chr2	136783103	-	-	-
cg27110277	2.38851e-17	chr8	16860121	cg04451175	0.000535118	0.00266846
cg27110277	2.38851e-17	chr8	16860121	cg14605021	1.52345e-05	0.00183409
cg27110277	2.38851e-17	chr8	16860121	cg11196848	0.0571667	0.00170886
cg27110277	2.38851e-17	chr8	16860121	cg17808882	0.00349518	0.00195219
cg27110277	2.38851e-17	chr8	16860121	cg06872257	0.0101178	0.00191336
cg00186909	2.57104e-17	chr12	93129288	cg20829550	3.25683e-06	-0.00479297
cg18875496	2.57825e-17	chr17	55338456	-	-	-
cg09653641	2.59004e-17	chr7	92455499	-	-	-
cg14289429	2.89482e-17	chr9	134139878	-	-	-
cg26916780	3.12468e-17	chr15	64889554	-	-	-
cg23839159	3.41829e-17	chr1	43281794	-	-	-
cg07749597	3.52335e-17	chr5	42840698	-	-	-
cg23754918	3.75711e-17	chr7	2653733	-	-	-
cg02493846	3.92755e-17	chr1	151809534	-	-	-
cg26724018	4.19493e-17	chr11	5716255	-	-	-
cg12063847	4.25251e-17	chr6	158184542	-	-	-
cg03271893	4.47604e-17	chr10	102760970	cg19499884	1.69541e-05	-0.00405333
cg03271893	4.47604e-17	chr10	102760970	cg24760467	0.000116101	-0.00324521
cg11376341	4.81091e-17	chr10	21796152	cg05958910	0.119865	0.0014311
cg11376341	4.81091e-17	chr10	21796152	cg03610228	2.29413e-05	0.0046819
cg11376341	4.81091e-17	chr10	21796152	cg04714110	0.000196433	0.00388104
cg11376341	4.81091e-17	chr10	21796152	cg04956801	0.0596716	0.00173957
cg02654940	4.88395e-17	chr6	34206400	cg22797644	7.38564e-06	0.00235661
cg02654940	4.88395e-17	chr6	34206400	cg08335767	9.62471e-05	0.0017933
cg02654940	4.88395e-17	chr6	34206400	cg25207224	7.61984e-08	-0.00388019
cg19483007	4.91731e-17	chr3	149327651	-	-	-
cg16174106	5.08195e-17	chr1	210503830	-	-	-
cg23355492	5.22947e-17	chr17	45933593	-	-	-
cg02294302	5.38388e-17	chr1	47906276	-	-	-
cg10324998	5.50868e-17	chr1	92338262	-	-	-
cg04878826	5.98933e-17	chr1	117398001	-	-	-
cg06379435	6.35116e-17	chr19	3344273	-	-	-
cg12063580	7.21037e-17	chr14	105783627	cg00241281	6.87124e-05	-0.00345734
cg01368219	7.69728e-17	chr3	54999791	-	-	-
cg00093643	8.37207e-17	chr15	44579510	-	-	-
cg04859117	8.43436e-17	chr11	2011341	cg27196158	0.00584614	0.00223007
cg20600850	8.65255e-17	chr12	6712515	cg06629086	2.20994e-12	0.00163636
cg18556420	8.68546e-17	chr10	864596	-	-	-
cg14107488	8.8266e-17	chr4	7033722	cg09907542	0.000273481	-0.00300917
cg00166343	1.04187e-16	chr17	29150100	cg16936289	3.02289e-09	-0.00512033
cg09476997	1.05281e-16	chr16	2087932	-	-	-
cg00232092	1.12249e-16	chr7	5518887	cg20427144	6.10759e-07	-0.0045806
cg10623219	1.18764e-16	chr12	52242807	-	-	-
cg26740249	1.20659e-16	chr17	76036514	-	-	-
cg22846826	1.32543e-16	chr7	4723927	cg22218709	5.13844e-10	-0.00270488
cg22846826	1.32543e-16	chr7	4723927	cg04160501	4.11984e-09	-0.00492489
cg26871347	1.33705e-16	chr17	55371727	-	-	-
cg01921773	1.35303e-16	chr16	75661691	-	-	-
cg04037585	1.48559e-16	chr16	56231292	-	-	-
cg17738521	1.5094e-16	chr6	143224179	-	-	-
cg21333338	1.58956e-16	chr17	2808456	-	-	-
cg07813031	1.6377e-16	chr1	61298421	-	-	-
cg11945297	1.77842e-16	chr8	102514634	-	-	-
cg27485596	1.8015e-16	chr13	111829530	-	-	-
cg10422709	2.08142e-16	chr15	53083978	-	-	-
cg07145783	2.10894e-16	chr1	160855077	-	-	-
cg17477052	2.15263e-16	chr10	71596731	-	-	-
cg15462501	2.51776e-16	chr22	40437196	-	-	-
cg13390284	2.7839e-16	chr1	65531864	cg00257455	4.35688e-10	-0.00391875
cg07090356	3.28612e-16	chr18	23668764	cg13022174	1.26991e-05	0.00094391
cg25642234	3.4459e-16	chr12	14721092	cg04473902	0.0119645	0.00165769
cg25642234	3.4459e-16	chr12	14721092	cg17768691	0.124516	0.000836338
cg08645860	3.62094e-16	chr16	85969301	-	-	-
cg26385222	3.71739e-16	chr7	150497077	cg05017199	0.067314	0.00106083
cg26385222	3.71739e-16	chr7	150497077	cg14991769	0.004128	0.00285775
cg05500734	3.80267e-16	chr7	73437649	-	-	-
cg25850808	3.88287e-16	chr6	74405048	-	-	-
cg12758082	4.14371e-16	chr13	113407769	-	-	-
cg19873297	4.23801e-16	chr5	171616388	cg16675054	0.204528	0.000759311
cg19873297	4.23801e-16	chr5	171616388	cg26006084	0.574542	0.000367525
cg19873297	4.23801e-16	chr5	171616388	cg19782271	0.611988	0.000574134
cg22877452	4.38828e-16	chr1	61517876	cg11254532	0.000359044	0.00296292
cg22877452	4.38828e-16	chr1	61517876	cg09113483	0.710489	0.000379453
cg12697139	4.53195e-16	chr1	209571889	-	-	-
cg01133215	5.0186e-16	chr6	45399681	-	-	-
cg23378033	5.08616e-16	chr12	65672031	cg12488187	1.03759e-07	-0.00461992
cg23378033	5.08616e-16	chr12	65672031	cg20315554	2.50355e-10	-0.00568654
cg00634542	5.36233e-16	chr2	219254588	-	-	-
cg27293155	6.0483e-16	chr2	38044012	cg26750893	1.75566e-05	0.00341238
cg11327857	6.20417e-16	chr4	123747558	cg24683623	0.000443523	0.00285243
cg18816534	7.51194e-16	chr5	158385443	-	-	-
cg16684817	7.55284e-16	chr1	28202173	-	-	-
cg10975897	7.61264e-16	chr6	15504844	cg20052079	0.000420854	-0.0029336
cg10975897	7.61264e-16	chr6	15504844	cg13027183	0.0305969	-0.00171232
cg10975897	7.61264e-16	chr6	15504844	cg18188328	3.30214e-08	-0.00855602
cg10975897	7.61264e-16	chr6	15504844	cg24408769	0.000262818	-0.00341208
cg19295068	7.73605e-16	chr19	48206119	cg23511285	4.58326e-06	-0.00336208
cg08305575	7.84879e-16	chr5	158018481	-	-	-
cg24633390	8.07678e-16	chr1	173159746	-	-	-
cg11387340	8.22191e-16	chr6	166970727	-	-	-
cg24159436	8.66344e-16	chr3	16974681	cg19448816	0.00232749	-0.00196299
cg08369079	8.86393e-16	chr6	106551623	-	-	-
cg13305823	8.88118e-16	chr6	29454557	cg20103692	6.1057e-07	-0.00387516
cg14154456	9.55922e-16	chr6	82946781	-	-	-
cg13641317	9.72186e-16	chr3	127255552	-	-	-
cg23291039	1.02947e-15	chr4	25808901	-	-	-
cg05648303	1.0671e-15	chr4	141264393	cg19478223	0.00137226	-0.00297338
cg05648303	1.0671e-15	chr4	141264393	cg23188579	0.00149186	-0.00233959
cg05648303	1.0671e-15	chr4	141264393	cg21321372	2.33031e-05	-0.00523666
cg05648303	1.0671e-15	chr4	141264393	cg16269196	0.0568197	-0.0021357
cg20072118	1.14959e-15	chr12	52653637	-	-	-
cg05059607	1.16826e-15	chr17	65488100	-	-	-
cg10426370	1.17729e-15	chr5	54282459	-	-	-
cg26677004	1.34767e-15	chr1	179787968	-	-	-
cg08282819	1.718e-15	chr16	27437900	cg02983090	0.0619766	-0.00159173
cg09170311	1.7817e-15	chr11	111385778	cg22806002	2.6867e-08	0.00311514
cg20327845	1.79083e-15	chr10	3138418	cg04188920	1.86246e-07	-0.00574554
cg20327845	1.79083e-15	chr10	3138418	cg26644674	4.72732e-05	-0.00386979
cg19049607	1.79701e-15	chr12	12764333	-	-	-
cg11118235	1.85051e-15	chr3	50284010	-	-	-
cg13380995	1.89243e-15	chr6	37670128	-	-	-
cg14258501	1.96792e-15	chr6	31680228	cg13123009	1.42936e-08	0.00394155
cg14258501	1.96792e-15	chr6	31680228	cg27198696	3.09536e-05	-0.00315981
cg14258501	1.96792e-15	chr6	31680228	cg20133890	0.000114978	-0.00329276
cg17239103	2.01609e-15	chr1	159870074	cg00099427	1.84772e-05	0.00372079
cg17239103	2.01609e-15	chr1	159870074	cg25153824	0.243964	0.000611306
cg18402166	2.01704e-15	chr17	62778279	-	-	-
cg09570614	2.07845e-15	chr2	112124380	-	-	-
cg16597079	2.16158e-15	chr6	42385637	-	-	-
cg05249026	2.24333e-15	chr16	11031524	-	-	-
cg21132686	2.24788e-15	chr20	22795774	-	-	-
cg16705546	2.27789e-15	chr16	85936666	-	-	-
cg26841068	2.45525e-15	chr1	203456691	-	-	-
cg18038207	2.47627e-15	chr12	80581062	-	-	-
cg03640051	2.56535e-15	chr4	42657689	-	-	-
cg18998543	2.72545e-15	chr7	2769865	cg13034073	5.90818e-06	-0.00391974
cg00066663	2.9075e-15	chr17	7792674	cg07430820	2.18962e-10	-0.00320858
cg22400703	3.12234e-15	chr2	68545995	cg06275642	8.46007e-05	0.00230759
cg22400703	3.12234e-15	chr2	68545995	cg21581504	0.00439474	0.00222449
cg20345915	3.14473e-15	chr10	121296042	cg05241536	1.44266e-08	0.00302171
cg10153349	3.21727e-15	chr11	13983893	cg22805485	0.00722436	0.0024819
cg10153349	3.21727e-15	chr11	13983893	cg00609834	2.76381e-08	0.00195457
cg10153349	3.21727e-15	chr11	13983893	cg24258347	0.0128152	0.00235712
cg27210390	3.32162e-15	chr17	52978583	-	-	-
cg09479286	3.74914e-15	chr2	169659182	-	-	-
cg02747950	3.83353e-15	chr15	63526883	-	-	-
cg06043908	4.29647e-15	chr8	49467831	-	-	-
cg03492827	4.3603e-15	chr7	72838601	-	-	-
cg00785980	4.44466e-15	chr13	32984237	-	-	-
cg15478483	4.77628e-15	chr6	111936529	-	-	-
cg16107105	5.00888e-15	chr7	150646704	-	-	-
cg12774946	5.08447e-15	chr6	129966801	-	-	-
cg12810800	5.11949e-15	chr2	159788345	-	-	-
cg16277071	5.48736e-15	chr17	75537317	cg08370173	0.00033627	0.00270481
cg16277071	5.48736e-15	chr17	75537317	cg27108424	0.000315831	0.00279848
cg14553895	5.63954e-15	chr3	178899170	-	-	-
cg00257775	5.67038e-15	chr6	37904681	-	-	-
cg15123573	5.77603e-15	chr5	176827082	cg01287088	9.28014e-06	0.0049253
cg13561409	6.47318e-15	chr19	3677220	-	-	-
cg25020550	6.65886e-15	chr8	134028958	-	-	-
cg10505630	7.07101e-15	chr5	151051214	-	-	-
cg22730004	7.68344e-15	chr1	158656718	-	-	-
cg14434062	8.22942e-15	chr15	70767419	-	-	-
cg19607845	8.49026e-15	chr6	52934457	-	-	-
cg20441135	8.92514e-15	chr10	93999132	-	-	-
cg23304605	9.54884e-15	chr14	91866373	cg13027206	3.13812e-05	-0.00263028
cg14830371	9.76285e-15	chr8	25991602	-	-	-
cg09718582	1.02759e-14	chr2	240751196	-	-	-
cg12001120	1.20718e-14	chr2	219751342	-	-	-
cg12646820	1.24038e-14	chr6	13924406	cg26890706	0.00439622	0.00228452
cg24087613	1.25799e-14	chr4	129112470	-	-	-
cg05135156	1.36815e-14	chr1	184355420	cg12550731	2.78292e-08	0.00484327
cg08813888	1.37412e-14	chr2	662396	-	-	-
cg09007354	1.42499e-14	chr1	54100163	-	-	-
cg05433642	1.43636e-14	chr13	97873992	cg10458216	6.21684e-05	-0.00393266
cg14620184	1.5508e-14	chr2	29941470	-	-	-
cg01578442	1.57958e-14	chr5	124223911	-	-	-
cg05900530	1.67714e-14	chr3	167371353	-	-	-
cg18778196	1.68e-14	chr15	67054877	-	-	-
cg25841625	1.77613e-14	chr4	77119588	-	-	-
cg25618424	1.81287e-14	chr1	2989307	-	-	-
cg15954235	1.82297e-14	chr6	34514887	-	-	-
cg25157472	1.8505e-14	chr3	12996362	-	-	-
cg08412913	1.95894e-14	chr16	85429522	-	-	-
cg26383193	2.03079e-14	chr4	47488375	-	-	-
cg00782811	2.04484e-14	chr6	46293734	-	-	-
cg24455405	2.19998e-14	chr6	33172353	cg09724776	0.0111953	0.000456266
cg19190699	2.2559e-14	chr15	101514156	cg00927594	0.0267781	0.00253219
cg24378227	2.28518e-14	chr6	1396771	-	-	-
cg18959309	2.35142e-14	chr1	220864248	cg01471713	0.00016363	0.00263797
cg23230929	2.39861e-14	chr2	87883547	cg20731257	0.647962	0.000309195
cg21408360	2.46866e-14	chr1	203493477	-	-	-
cg09333580	2.58159e-14	chr20	31606541	-	-	-
cg25009965	2.59877e-14	chr11	114031120	-	-	-
cg27262054	2.66445e-14	chr16	73067525	-	-	-
cg00546897	2.7833e-14	chr21	45232232	cg23512275	1.9868e-05	-0.00347194
cg00546897	2.7833e-14	chr21	45232232	cg07003407	0.000223802	-0.00315595
cg23436584	3.04295e-14	chr12	98833359	-	-	-
cg16089416	3.13388e-14	chr5	126114228	-	-	-
cg06454226	3.15344e-14	chr18	2572965	cg16168723	3.72283e-07	0.00110299
cg17969560	3.24913e-14	chr11	65324768	-	-	-
cg07298299	3.27281e-14	chr11	45943237	-	-	-
cg17680767	3.31879e-14	chr5	73623208	-	-	-
cg05298628	3.41207e-14	chr12	123379569	cg22608507	1.15796e-05	-0.00327014
cg08435674	3.49554e-14	chr6	36308494	-	-	-
cg14556762	4.07704e-14	chr1	170532470	-	-	-
cg15489693	4.3048e-14	chr4	10498037	-	-	-
cg08503681	4.3337e-14	chr5	145895884	-	-	-
cg01798157	4.74288e-14	chr1	203276595	-	-	-
cg09152259	4.81515e-14	chr2	128156114	-	-	-
cg10501360	5.04313e-14	chr10	49671665	-	-	-
cg17980119	5.15282e-14	chr2	219472607	-	-	-
cg21574271	5.18566e-14	chr4	96051461	-	-	-
cg14427590	5.35035e-14	chr17	60695089	-	-	-
cg06540458	5.61788e-14	chr1	226951747	-	-	-
cg08937102	5.6869e-14	chr1	1690389	-	-	-
cg18745416	6.00856e-14	chr6	152011399	-	-	-
cg13347910	6.61534e-14	chr6	10555853	cg07264048	0.72602	0.000289176
cg13347910	6.61534e-14	chr6	10555853	cg12242450	0.708653	-0.000291217
cg13347910	6.61534e-14	chr6	10555853	cg08027484	0.0904295	0.00118923
cg13347910	6.61534e-14	chr6	10555853	cg12695465	0.788942	0.000234769
cg00575529	6.80962e-14	chr6	30685080	cg16253551	0.00375763	0.00059861
cg25219643	7.02401e-14	chr11	86106473	-	-	-
cg25344672	7.13282e-14	chr9	135285207	cg02735762	2.03402e-08	-0.00239651
cg07276534	7.27334e-14	chr3	193534580	-	-	-
cg17610169	7.62027e-14	chr11	10750973	cg07276621	0.00220596	0.00228334
cg00512459	7.91417e-14	chr15	88266173	-	-	-
cg24340029	8.12823e-14	chr9	136039283	-	-	-
cg05287480	8.49419e-14	chr7	27176127	cg11908057	1.138e-06	0.00651605
cg25112877	8.70519e-14	chr2	159702723	-	-	-
cg19035792	9.06736e-14	chr22	38382245	-	-	-
cg08041350	9.10795e-14	chr17	25819112	-	-	-
cg18503234	9.17144e-14	chr11	68847839	cg26433582	3.33536e-05	-0.00386283
cg08026631	9.40166e-14	chr1	151372335	-	-	-
cg26728709	1.03375e-13	chr4	114823338	-	-	-
cg25137841	1.03973e-13	chr22	31536585	cg08457421	4.60895e-05	0.00268188
cg25137841	1.03973e-13	chr22	31536585	cg25937577	0.00070687	0.00271968
cg25137841	1.03973e-13	chr22	31536585	cg05815196	0.00178539	0.00220297
cg25137841	1.03973e-13	chr22	31536585	cg00727590	0.00203897	0.00202786
cg03390636	1.05422e-13	chr15	80843452	-	-	-
cg14419435	1.06277e-13	chr17	48906982	-	-	-
cg05526498	1.06447e-13	chr17	49012893	cg13241751	1.69043e-06	-0.00305303
cg27508620	1.07583e-13	chr7	21209725	cg08701183	0.00523137	0.00227028
cg27508620	1.07583e-13	chr7	21209725	cg16448636	0.00883381	0.00189172
cg00781658	1.11245e-13	chr19	41805850	-	-	-
cg03747456	1.13951e-13	chr12	52586127	-	-	-
cg20752878	1.1723e-13	chr17	7080538	-	-	-
cg12192749	1.19026e-13	chr7	17029795	-	-	-
cg10714509	1.20199e-13	chr1	234680511	-	-	-
cg13622265	1.24595e-13	chr9	124584474	-	-	-
cg26262157	1.2588e-13	chr10	6214079	cg08994060	0.0988407	-0.000910388
cg26262157	1.2588e-13	chr10	6214079	cg05014727	0.20191	-0.000846968
cg26396492	1.2706e-13	chr20	19915762	-	-	-
cg09022230	1.28258e-13	chr7	5457225	-	-	-
cg24916358	1.30692e-13	chr10	126315761	-	-	-
cg04920452	1.30888e-13	chr17	76227681	cg05767562	0.00326135	0.00234431
cg23007087	1.34273e-13	chr15	90380258	-	-	-
cg10250177	1.34345e-13	chr1	32739752	-	-	-
cg10489463	1.364e-13	chr2	33546572	-	-	-
cg23587050	1.40454e-13	chr11	110301128	-	-	-
cg05626664	1.4076e-13	chr1	208394231	-	-	-
cg08070725	1.44146e-13	chr13	39991764	-	-	-
cg02392124	1.48215e-13	chr10	28876249	-	-	-
cg02439077	1.50093e-13	chr10	72202215	cg04840290	3.65449e-05	0.00208002
cg02439077	1.50093e-13	chr10	72202215	cg08724254	3.05449e-05	0.00199271
cg15527674	1.50839e-13	chr11	61248474	cg10949576	3.93662e-06	0.00327255
cg04997045	1.53368e-13	chr4	1240068	cg17404981	0.0153129	-0.00217065
cg12813802	1.55546e-13	chr8	97316933	-	-	-
cg12024104	1.56953e-13	chr12	6662581	-	-	-
cg09761503	1.70257e-13	chr7	142659349	-	-	-
cg01787084	1.70821e-13	chr16	87371097	-	-	-
cg13733403	1.72455e-13	chr19	6528291	-	-	-
cg06652329	1.75962e-13	chr12	102874566	-	-	-
cg07047815	1.77419e-13	chr11	1909656	-	-	-
cg02525826	1.81586e-13	chr4	55091178	-	-	-
cg21124375	1.89883e-13	chr2	232765392	cg17186087	3.14389e-05	0.00296778
cg20924136	1.91439e-13	chr2	230808359	-	-	-
cg10695490	1.9253e-13	chr19	49659299	-	-	-
cg07063912	1.9658e-13	chr2	238598832	cg20732367	4.80464e-06	0.000927731
cg00351443	2.00805e-13	chr10	105252720	cg07869830	1.06645e-06	0.00364794
cg10689689	2.02341e-13	chr11	63677197	-	-	-
cg09229492	2.05685e-13	chr16	50626578	-	-	-
cg13078421	2.1491e-13	chr19	2624622	-	-	-
cg15442737	2.1515e-13	chr8	141370229	-	-	-
cg27315157	2.17709e-13	chr1	79086197	-	-	-
cg11540997	2.17893e-13	chr15	45407818	-	-	-
cg18728264	2.24352e-13	chr11	118766491	-	-	-
cg18214661	2.25326e-13	chr8	17471997	-	-	-
cg03654783	2.27856e-13	chr1	156634034	-	-	-
cg08899667	2.29272e-13	chr6	31761055	cg02980249	1.84026e-05	-0.00380494
cg08899667	2.29272e-13	chr6	31761055	cg03877020	7.96941e-08	0.00175777
cg08899667	2.29272e-13	chr6	31761055	cg02597894	0.00026362	-0.00266773
cg08899667	2.29272e-13	chr6	31761055	cg15948030	8.69894e-05	-0.00249536
cg08899667	2.29272e-13	chr6	31761055	cg09514717	1.69412e-06	0.00106612
cg14292619	2.30913e-13	chr12	75784617	cg02789485	4.87317e-07	-0.00427681
cg08531140	2.33197e-13	chr11	67143062	-	-	-
cg17571207	2.37944e-13	chr22	33257641	-	-	-
cg00153101	2.38635e-13	chr1	2431753	-	-	-
cg15028899	2.46376e-13	chr11	120275443	-	-	-
cg13428066	2.59236e-13	chr11	2677768	cg07556018	0.00014342	-0.00286129
cg18436214	2.62468e-13	chr10	77268489	-	-	-
cg07069759	2.63157e-13	chr10	47134171	cg07000686	0.0126137	0.00163565
cg17489312	2.63622e-13	chr1	9376039	cg26363759	1.62179e-13	-0.0136252
cg08110488	2.65106e-13	chr1	82136224	-	-	-
cg24924577	2.78376e-13	chr15	90735148	-	-	-
cg12497007	2.83773e-13	chr16	29828301	cg15777760	2.07503e-11	-0.00464095
cg01832549	2.88514e-13	chr1	19774989	-	-	-
cg24401487	3.04961e-13	chr1	230416880	cg12526197	0.00161274	-0.00252155
cg11426726	3.11671e-13	chr15	63845726	-	-	-
cg03904291	3.11837e-13	chr11	119019361	cg03222066	0.00399219	0.00234347
cg02888917	3.14791e-13	chr6	32940425	cg10919398	0.0850018	0.000302632
cg02888917	3.14791e-13	chr6	32940425	cg21580173	0.00650105	0.000399493
cg27239243	3.20048e-13	chr2	101945867	-	-	-
cg23238677	3.53689e-13	chr2	170157334	-	-	-
cg14353958	3.63402e-13	chr9	71947038	-	-	-
cg13309628	3.72719e-13	chr20	3801056	-	-	-
cg23414595	3.88892e-13	chr22	30129607	-	-	-
cg12214451	3.90751e-13	chr4	114900175	cg18378811	0.00230924	0.00326786
cg27381979	3.93809e-13	chr3	13537787	-	-	-
cg04845871	4.02632e-13	chr1	207996319	-	-	-
cg00834923	4.16391e-13	chr16	85393998	-	-	-
cg10824354	4.2242e-13	chr17	47049956	-	-	-
cg23208717	4.22588e-13	chr7	150082688	-	-	-
cg11236515	4.34274e-13	chr2	74213762	-	-	-
cg19442415	4.70006e-13	chr11	116567334	-	-	-
cg12622182	4.70378e-13	chr1	38513641	cg17791651	0.00154337	0.00211808
cg04802801	4.73749e-13	chr6	30034711	-	-	-
cg25567674	4.78027e-13	chr3	123751655	cg07349815	2.49928e-05	0.00366513
cg12577010	4.97254e-13	chr7	134832544	cg21363348	2.76216e-05	-0.00211717
cg12577010	4.97254e-13	chr7	134832544	cg14710552	0.00293871	-0.00275383
cg12577010	4.97254e-13	chr7	134832544	cg08016257	0.00428941	-0.00171139
cg23061725	5.05386e-13	chr2	202126379	-	-	-
cg01187562	5.14584e-13	chr11	76382128	cg10788371	6.02386e-06	0.00304079
cg02154252	5.32249e-13	chr1	79472532	cg18592365	0.000217221	0.0019874
cg02154252	5.32249e-13	chr1	79472532	cg13175159	0.000840102	0.00254135
cg19401033	5.36801e-13	chr3	107148372	-	-	-
cg03663556	5.42881e-13	chr7	50900556	-	-	-
cg04499029	5.51914e-13	chr19	13210356	cg18299835	0.11773	0.000373329
cg26096752	5.55282e-13	chr5	66530611	-	-	-
cg23674602	5.57748e-13	chr10	74023752	-	-	-
cg09940188	5.65464e-13	chr17	1686671	cg23679982	0.168769	-0.000952822
cg04505252	5.74889e-13	chr6	15244745	-	-	-
cg08783253	5.75226e-13	chr17	40996565	-	-	-
cg27480377	5.9816e-13	chr3	197518634	-	-	-
cg13932501	6.22961e-13	chr9	94060853	-	-	-
cg15161667	6.38564e-13	chr11	46940613	-	-	-
cg21800906	6.54468e-13	chr11	32914818	-	-	-
cg00587472	7.0143e-13	chr2	6952860	-	-	-
cg01538731	7.28227e-13	chr16	87757018	cg05830220	0.0617471	-0.00132719
cg09560590	7.6812e-13	chr5	143191663	cg04225775	0.00780412	-0.00135269
cg09560590	7.6812e-13	chr5	143191663	cg02228160	0.00421215	-0.00157817
cg18870258	8.08623e-13	chr20	9460935	-	-	-
cg13784312	8.0966e-13	chr9	134609065	-	-	-
cg05413199	8.20162e-13	chr16	67430454	-	-	-
cg01289541	8.30212e-13	chr3	170282058	-	-	-
cg07243147	8.31196e-13	chr7	150744274	-	-	-
cg10406027	8.38333e-13	chr16	11876912	cg02535219	0.054902	-0.000940187
cg21788755	8.75944e-13	chr3	48508391	-	-	-
cg06029700	9.09723e-13	chr12	6473311	cg03196720	0.0691101	-0.00181057
cg18865207	9.692e-13	chr1	160765919	-	-	-
cg02186444	9.75103e-13	chr17	73120977	-	-	-
cg16306870	9.91467e-13	chr3	194868790	cg21937377	0.11165	-0.00119464
cg16306870	9.91467e-13	chr3	194868790	cg19760965	0.327824	-0.000993701
cg05339037	1.02474e-12	chr19	13951168	-	-	-
cg09626867	1.02856e-12	chr3	45053351	-	-	-
cg14656043	1.0501e-12	chr10	35419996	-	-	-
cg25414605	1.06468e-12	chr11	67182672	cg26800893	3.01171e-07	-0.00362508
cg25414605	1.06468e-12	chr11	67182672	cg10422334	2.37672e-06	-0.0030515
cg13638867	1.08114e-12	chr11	2241568	-	-	-
cg07732037	1.1175e-12	chr12	123707827	cg21805179	0.00905076	-0.00248877
cg07106169	1.12663e-12	chr2	95740362	cg00866476	0.000206059	-0.00256728
cg11132223	1.13521e-12	chr1	169696560	-	-	-
cg03485674	1.15131e-12	chr16	50347895	cg10341242	1.32416e-05	-0.00260991
cg24776736	1.15863e-12	chr12	66356357	-	-	-
cg09255851	1.20202e-12	chr16	24555610	-	-	-
cg12194745	1.20916e-12	chr17	79423649	-	-	-
cg10428805	1.22894e-12	chr19	12035959	-	-	-
cg24166100	1.25e-12	chr2	218886643	-	-	-
cg09722609	1.25379e-12	chr5	149887422	-	-	-
cg21626540	1.26316e-12	chr2	10720198	-	-	-
cg01847614	1.26492e-12	chr6	43027266	cg10177591	0.123831	0.000247278
cg23754392	1.27185e-12	chr10	22611454	-	-	-
cg08872703	1.27844e-12	chr1	109849854	cg07196577	6.11462e-09	0.00432598
cg11591485	1.28394e-12	chr3	124839640	-	-	-
cg27640064	1.28957e-12	chr7	4752983	-	-	-
cg12741184	1.32389e-12	chr17	1397079	-	-	-
cg13675859	1.33826e-12	chr6	47002973	-	-	-
cg17714703	1.36862e-12	chr19	4912221	-	-	-
cg04052934	1.38726e-12	chr6	147179017	-	-	-
cg00499707	1.45927e-12	chr20	34679665	cg21028946	6.82744e-05	0.00238975
cg17692230	1.46208e-12	chr4	103360578	-	-	-
cg11399195	1.49255e-12	chr1	10364025	-	-	-
cg00424169	1.49923e-12	chr13	31506837	cg16290689	0.376108	0.000587026
cg00424169	1.49923e-12	chr13	31506837	cg27420922	0.721886	0.000200632
cg10016208	1.51927e-12	chr19	19143972	-	-	-
cg15053190	1.52712e-12	chr22	18893313	-	-	-
cg22374525	1.54506e-12	chr1	116370764	cg21852513	2.17047e-05	0.00232907
cg05404233	1.5673e-12	chr16	11490439	-	-	-
cg00721016	1.56942e-12	chr11	76745087	-	-	-
cg04384912	1.6233e-12	chr15	80325923	-	-	-
cg16874095	1.71024e-12	chr14	34529121	-	-	-
cg22422264	1.71026e-12	chr15	50792856	-	-	-
cg23890469	1.72775e-12	chr10	88715317	cg05046097	5.44861e-06	0.0030888
cg23100720	1.75299e-12	chr6	155770386	-	-	-
cg06272045	1.75675e-12	chr15	99979059	-	-	-
cg20503117	1.77084e-12	chr3	5164013	-	-	-
cg11067714	1.77106e-12	chr5	139492230	cg24119717	2.05175e-07	0.00400758
cg11067714	1.77106e-12	chr5	139492230	cg00079023	0.000135758	0.00213905
cg11067714	1.77106e-12	chr5	139492230	cg13613983	1.39925e-05	0.00103081
cg27585939	1.77202e-12	chr11	108983607	-	-	-
cg01723892	1.77268e-12	chr1	233004866	-	-	-
cg20314438	1.78305e-12	chr6	126661369	-	-	-
cg02573176	1.81094e-12	chr8	82607505	-	-	-
cg00448875	1.84983e-12	chr3	133611626	cg19793598	5.71854e-09	0.00486659
cg00448875	1.84983e-12	chr3	133611626	cg16954004	5.40528e-07	0.002855
cg10708898	1.88474e-12	chr1	35309303	-	-	-
cg19856897	1.91266e-12	chr7	142495846	cg16767506	0.00182461	-0.00373123
cg19856897	1.91266e-12	chr7	142495846	cg17230773	0.0146069	-0.00251792
cg19856897	1.91266e-12	chr7	142495846	cg13264840	0.0457854	-0.00240385
cg19856897	1.91266e-12	chr7	142495846	cg21785034	0.135534	-0.00104515
cg01799671	1.91702e-12	chr16	81560752	-	-	-
cg09143713	1.94185e-12	chr20	9141615	-	-	-
cg23513600	1.97536e-12	chr3	171171401	-	-	-
cg05943996	1.98486e-12	chr14	42075975	-	-	-
cg18064714	2.03026e-12	chr7	20824556	cg14141380	0.000154908	0.000781466
cg00293940	2.04875e-12	chr12	60044871	-	-	-
cg07788865	2.09123e-12	chr10	30101042	-	-	-
cg26828842	2.09825e-12	chr18	67952086	-	-	-
cg00034559	2.11865e-12	chr2	39892124	-	-	-
cg24453118	2.19715e-12	chr13	47229927	-	-	-
cg06768010	2.20145e-12	chr2	74729502	cg11985480	3.48004e-05	0.00437577
cg06768010	2.20145e-12	chr2	74729502	cg17105139	2.27744e-05	0.00369477
cg06768010	2.20145e-12	chr2	74729502	cg10738368	1.97249e-05	0.00262441
cg05515099	2.2186e-12	chr3	69482656	-	-	-
cg01556246	2.2776e-12	chr8	8204802	cg25474235	2.60708e-07	-0.00468478
cg04411893	2.27841e-12	chr3	185300709	cg02872623	3.07349e-21	0.00226615
cg19087119	2.29029e-12	chr11	3400323	-	-	-
cg00582562	2.31333e-12	chr17	46388465	cg24636368	0.117166	0.00106163
cg00582562	2.31333e-12	chr17	46388465	cg08441803	0.197917	0.00142508
cg19628934	2.39037e-12	chr14	77499391	-	-	-
cg23730027	2.44281e-12	chr3	57995180	cg17338821	0.000685593	-0.00239583
cg27019717	2.50648e-12	chr14	52351055	-	-	-
cg06164260	2.63829e-12	chr3	187454439	-	-	-
cg13993853	2.66165e-12	chr13	21277342	-	-	-
cg01572884	2.7705e-12	chr1	110610266	-	-	-
cg21166916	2.89031e-12	chr22	42316481	-	-	-
cg07719604	2.9812e-12	chr16	67232460	-	-	-
cg26815802	3.01615e-12	chr7	44613874	-	-	-
cg24956866	3.02516e-12	chr7	134464129	cg16253634	0.0047608	0.00175243
cg24956866	3.02516e-12	chr7	134464129	cg14009688	0.00192103	0.00293684
cg13536265	3.04985e-12	chr14	24836539	-	-	-
cg16426670	3.0546e-12	chr20	2675996	cg05857996	0.000468858	0.00381619
cg09580592	3.07883e-12	chr17	907643	cg19029445	0.0039421	0.00290871
cg15428620	3.08984e-12	chr10	102792835	-	-	-
cg03297901	3.13534e-12	chr17	76117767	cg03848580	2.36251e-08	-0.0057523
cg11828203	3.17001e-12	chr7	31014714	-	-	-
cg07951519	3.19201e-12	chr17	4607306	-	-	-
cg11455018	3.22444e-12	chr16	30709778	-	-	-
cg03479289	3.24883e-12	chr11	33563377	cg14472551	0.001974	-0.00233537
cg03479289	3.24883e-12	chr11	33563377	cg08939373	0.00104761	-0.00325834
cg18854666	3.26736e-12	chr2	219247055	-	-	-
cg13873632	3.29924e-12	chr4	16853974	-	-	-
cg03366285	3.37482e-12	chr15	83474726	cg07728579	1.82646e-07	0.00422388
cg26069068	3.42056e-12	chr8	125741265	-	-	-
cg09238801	3.45499e-12	chr14	74179101	-	-	-
cg17163527	3.45877e-12	chr1	3447348	-	-	-
cg23548163	3.47848e-12	chr19	46807119	cg26749414	0.62601	0.000526389
cg07693037	3.58895e-12	chr3	128216748	-	-	-
cg06498520	3.59157e-12	chr4	186990006	cg17671280	0.000994283	-0.00234358
cg25960090	3.60998e-12	chr5	127277370	-	-	-
cg08080174	3.69948e-12	chr16	72992580	-	-	-
cg15016701	3.76014e-12	chr12	63211683	-	-	-
cg20053885	3.76335e-12	chr12	101988604	-	-	-
cg18028767	3.79112e-12	chr11	859873	-	-	-
cg08122899	3.88105e-12	chr3	49499574	-	-	-
cg02946294	3.88185e-12	chr11	17034844	-	-	-
cg18855140	3.96963e-12	chr11	114271182	cg26234034	0.00381407	0.000512712
cg16198723	4.06768e-12	chr3	112359557	cg12113356	0.00419381	0.00232676
cg16198723	4.06768e-12	chr3	112359557	cg24364668	0.0976653	0.00126996
cg11321035	4.10618e-12	chr19	13944814	-	-	-
cg01168584	4.18114e-12	chr18	2903245	-	-	-
cg03337084	4.26127e-12	chr6	31646061	-	-	-
cg19672145	4.30804e-12	chr2	65571891	-	-	-
cg09554443	4.309e-12	chr1	167487762	-	-	-
cg27005487	4.32324e-12	chr17	59484388	-	-	-
cg07357157	4.33603e-12	chr1	10690588	cg16057915	0.173209	-0.00089363
cg21968765	4.46544e-12	chr3	100712345	-	-	-
cg11727252	4.51872e-12	chr3	51752143	-	-	-
cg01258789	4.80607e-12	chr1	197237257	-	-	-
cg24020157	4.83774e-12	chr10	43697521	cg16060369	9.0795e-11	0.00669525
cg24020157	4.83774e-12	chr10	43697521	cg16595288	1.24923e-08	0.00586117
cg17779658	4.95366e-12	chr8	29606753	-	-	-
cg00539049	4.96979e-12	chr2	149933534	-	-	-
cg25426560	5.00969e-12	chr6	30640776	-	-	-
cg03652525	5.13577e-12	chr3	72149324	-	-	-
cg01999701	5.18048e-12	chr3	184456165	-	-	-
cg21301224	5.20317e-12	chr8	56813677	-	-	-
cg03732020	5.2969e-12	chr11	47282968	-	-	-
cg04592976	5.52062e-12	chr16	89984572	-	-	-
cg22284058	5.64945e-12	chr8	142237359	cg17207736	0.00166318	0.00351478
cg06457011	5.67872e-12	chr20	39767490	-	-	-
cg15239263	5.7887e-12	chr16	31086047	-	-	-
cg14479136	5.79118e-12	chr9	139222701	cg07324381	0.000114119	-0.00240266
cg23739746	5.8106e-12	chr13	114905867	-	-	-
cg08276042	6.01935e-12	chr16	2740348	-	-	-
cg06687489	6.13554e-12	chr15	52587077	-	-	-
cg17896927	6.14155e-12	chr15	93617030	cg04340651	0.0745705	-0.00113199
cg07941983	6.22779e-12	chr4	36245138	-	-	-
cg06804344	6.26086e-12	chr3	128778699	cg16098726	4.31955e-05	0.00286949
cg20337305	6.52673e-12	chr14	58711896	-	-	-
cg21404980	6.7057e-12	chr8	144599027	cg03345925	0.0001717	-0.00404744
cg00873517	6.73335e-12	chr8	136511832	-	-	-
cg14276580	6.96853e-12	chr13	40527020	-	-	-
cg08633665	7.19277e-12	chr8	128972829	-	-	-
cg11268834	7.24182e-12	chr2	224824500	-	-	-
cg10304534	7.29396e-12	chr13	95844361	-	-	-
cg25143652	7.30899e-12	chr20	62168670	-	-	-
cg03928384	7.56099e-12	chr3	46395191	-	-	-
cg22778014	7.67505e-12	chr4	109811985	-	-	-
cg12345526	7.81818e-12	chr2	173159062	-	-	-
cg18030453	8.18521e-12	chr3	45506216	-	-	-
cg20787693	8.20823e-12	chr1	26147374	-	-	-
cg02205445	8.22669e-12	chr2	144648543	-	-	-
cg01498832	8.48218e-12	chr17	78682934	-	-	-
cg25171348	8.51988e-12	chr7	28448200	cg20440891	0.0120032	0.00140276
cg06759518	8.57484e-12	chr3	72496799	cg16990174	0.00328899	0.0027378
cg06759518	8.57484e-12	chr3	72496799	cg22685502	0.035012	0.00181322
cg01394847	8.57613e-12	chr16	73101069	cg15712310	0.00692718	0.00193676
cg07181376	8.66829e-12	chr16	58035192	-	-	-
cg04466886	8.86207e-12	chr16	66521191	-	-	-
cg01939479	8.93974e-12	chr15	31195982	-	-	-
cg04004830	9.22136e-12	chr2	192711243	-	-	-
cg07351143	9.3684e-12	chr10	22623910	cg12490835	0.000221951	0.00205329
cg19884546	9.40629e-12	chr22	38082237	-	-	-
cg17986992	9.4571e-12	chr1	159825761	cg12217625	0.00658659	0.002825
cg17986992	9.4571e-12	chr1	159825761	cg24035898	0.0217439	0.00189708
cg17986992	9.4571e-12	chr1	159825761	cg00303378	0.00201361	0.00304087
cg17986992	9.4571e-12	chr1	159825761	cg25820858	3.46872e-09	0.00169125
cg13139542	9.65278e-12	chr2	8242815	-	-	-
cg14775286	9.65933e-12	chr3	137833494	-	-	-
cg19258882	9.82981e-12	chr12	56472805	-	-	-
cg05409945	9.87606e-12	chr12	52604025	-	-	-
cg05793930	9.9527e-12	chr1	110204227	-	-	-
cg24873093	1.01082e-11	chr1	45991060	-	-	-
cg08439728	1.01221e-11	chr6	31097073	-	-	-
cg22321327	1.02208e-11	chr11	47639458	-	-	-
cg01121022	1.03717e-11	chr14	104338788	-	-	-
cg16940801	1.04404e-11	chr15	72523516	cg22171725	0.0171612	0.000405167
cg21376799	1.05487e-11	chr6	30094960	cg14645861	0.00515638	0.0018906
cg21376799	1.05487e-11	chr6	30094960	cg12860635	0.0171518	0.0021256
cg21376799	1.05487e-11	chr6	30094960	cg06893296	0.0332837	0.00210397
cg21376799	1.05487e-11	chr6	30094960	cg26477792	0.0113898	0.00258875
cg21376799	1.05487e-11	chr6	30094960	cg20167366	0.0215497	0.00237858
cg21376799	1.05487e-11	chr6	30094960	cg21697794	0.00839038	0.00199927
cg21376799	1.05487e-11	chr6	30094960	cg26719062	0.0295342	0.0018641
cg03750061	1.06103e-11	chr10	119131167	-	-	-
cg20512303	1.0762e-11	chr5	131592959	cg27615366	1.53234e-05	0.00261081
cg20512303	1.0762e-11	chr5	131592959	cg07262247	5.75272e-06	0.00373094
cg22907189	1.10664e-11	chr5	172430563	-	-	-
cg22530449	1.10841e-11	chr3	184560962	-	-	-
cg13587908	1.13354e-11	chr9	139616233	-	-	-
cg24247370	1.15256e-11	chr13	99142703	-	-	-
cg21577233	1.15988e-11	chr1	201507860	-	-	-
cg04257388	1.16124e-11	chr10	16741464	cg12208848	1.1749e-05	0.00222875
cg04463638	1.1739e-11	chr22	19512712	cg05460329	0.00952252	0.00205778
cg04463638	1.1739e-11	chr22	19512712	cg16773741	0.0311041	0.00191724
cg04463638	1.1739e-11	chr22	19512712	cg14553765	0.032761	0.00173077
cg06250734	1.17417e-11	chr16	46723432	-	-	-
cg02194129	1.18813e-11	chr14	104171313	cg14172849	0.00939843	-0.00197038
cg14246703	1.19773e-11	chr9	138869077	-	-	-
cg22928599	1.2097e-11	chr19	46999403	-	-	-
cg11039241	1.22951e-11	chr17	186214	-	-	-
cg21922731	1.24434e-11	chr12	57157130	-	-	-
cg20843286	1.24892e-11	chr10	102045959	-	-	-
cg14732969	1.26511e-11	chr3	97542158	-	-	-
cg04345034	1.27924e-11	chr15	70797389	-	-	-
cg25050026	1.28975e-11	chr3	158519410	cg11632438	0.000118384	0.00318707
cg25050026	1.28975e-11	chr3	158519410	cg24324441	9.1278e-05	0.00310347
cg25050026	1.28975e-11	chr3	158519410	cg13419925	0.000414937	0.00342873
cg25050026	1.28975e-11	chr3	158519410	cg01971181	0.000842538	0.00376646
cg00962029	1.2918e-11	chr16	4475691	cg07617560	0.00463963	0.000581471
cg07361491	1.33606e-11	chr18	19749535	-	-	-
cg15717719	1.33912e-11	chr2	24150218	-	-	-
cg18515031	1.34251e-11	chr10	73988469	-	-	-
cg14499274	1.35755e-11	chr9	136705398	-	-	-
cg00646396	1.3604e-11	chr1	26482755	-	-	-
cg13714797	1.36641e-11	chr9	7103479	-	-	-
cg24824686	1.36685e-11	chr10	129797777	-	-	-
cg26799474	1.36856e-11	chr2	202098951	-	-	-
cg22065514	1.38803e-11	chr3	48602040	cg10179004	0.00114449	0.00260568
cg06832677	1.39561e-11	chr2	119976764	-	-	-
cg17356733	1.40029e-11	chr21	34774627	-	-	-
cg14906690	1.42158e-11	chr10	76573506	cg04359418	0.000213217	0.00341514
cg14906690	1.42158e-11	chr10	76573506	cg27102629	0.00096327	0.003309
cg25928629	1.42869e-11	chr2	218515567	-	-	-
cg20286956	1.43355e-11	chr1	39547918	-	-	-
cg15552493	1.48594e-11	chr2	102387391	-	-	-
cg08764162	1.4872e-11	chr10	31147088	-	-	-
cg01750375	1.50842e-11	chr20	43343365	-	-	-
cg27565899	1.51393e-11	chr1	110166664	cg20885089	2.86188e-11	0.00144532
cg04834534	1.51909e-11	chr5	175815541	cg16470576	0.00692837	0.000441208
cg18727936	1.52144e-11	chr10	135051044	cg19875532	1.15913e-05	0.00336801
cg18727936	1.52144e-11	chr10	135051044	cg23845574	0.00132042	0.00260701
cg18727936	1.52144e-11	chr10	135051044	cg04347264	0.00482523	0.0026552
cg18727936	1.52144e-11	chr10	135051044	cg02645368	0.00134324	0.00223869
cg18727936	1.52144e-11	chr10	135051044	cg00162806	0.000856946	0.00282239
cg18201671	1.54592e-11	chr1	223317548	-	-	-
cg03438520	1.56455e-11	chr13	77600571	-	-	-
cg13783786	1.57058e-11	chr9	112697363	-	-	-
cg19592472	1.60189e-11	chr20	3052274	cg26267561	0.00823653	-0.00228252
cg19592472	1.60189e-11	chr20	3052274	cg01644611	0.151153	-0.000625528
cg19592472	1.60189e-11	chr20	3052274	cg04731988	0.00891625	-0.00233499
cg19592472	1.60189e-11	chr20	3052274	cg13285174	0.352635	-0.000754668
cg19592472	1.60189e-11	chr20	3052274	cg13725599	0.381872	-0.00025476
cg09999250	1.61393e-11	chr5	68462783	cg10556830	0.00124865	0.000690444
cg09999250	1.61393e-11	chr5	68462783	cg24088685	0.0118506	0.000482732
cg19851816	1.62926e-11	chr22	50657907	-	-	-
cg02327719	1.63806e-11	chr1	26185386	-	-	-
cg07705835	1.65922e-11	chr3	9959128	-	-	-
cg13856340	1.67475e-11	chr9	127888818	-	-	-
cg11969813	1.68837e-11	chr17	79816559	cg04050119	5.9892e-08	0.00129832
cg11969813	1.68837e-11	chr17	79816559	cg17614750	3.06391e-07	0.00112039
cg06664254	1.69142e-11	chr16	75628226	-	-	-
cg23145336	1.77237e-11	chr6	32060816	cg24504289	1.75374e-05	0.00290889
cg00812761	1.80586e-11	chr4	53799391	-	-	-
cg01814186	1.80945e-11	chr16	69600788	-	-	-
cg01634146	1.81847e-11	chr19	13127389	cg27392771	1.18074e-05	0.00272265
cg01634146	1.81847e-11	chr19	13127389	cg15783941	4.82592e-05	0.00415194
cg05387269	1.85389e-11	chr1	1306946	-	-	-
cg12743470	1.8663e-11	chr14	74815085	-	-	-
cg00458681	1.86639e-11	chr22	19010419	-	-	-
cg02483931	1.87255e-11	chr17	34202461	-	-	-
cg16883533	1.88199e-11	chr12	7079667	cg20595394	0.0169741	0.000453279
cg27504369	1.90287e-11	chr22	39353550	-	-	-
cg16730908	1.91141e-11	chr18	43652592	-	-	-
cg08899895	2.01916e-11	chr16	85684853	-	-	-
cg23516824	2.03618e-11	chr5	76134399	-	-	-
cg13695646	2.05314e-11	chr5	78407509	-	-	-
cg08951907	2.06568e-11	chr17	18218556	-	-	-
cg10791696	2.08626e-11	chr10	43818911	cg14769703	0.0187669	0.00179648
cg14142087	2.09993e-11	chr9	110479859	-	-	-
cg11199014	2.11047e-11	chr19	39798563	-	-	-
cg25995980	2.1791e-11	chr10	46993515	cg15248828	0.00010546	0.00210326
cg02768162	2.1903e-11	chr12	108992148	-	-	-
cg24839718	2.2394e-11	chr19	37568953	cg03391040	0.00848661	0.000453141
cg18822950	2.24614e-11	chr17	46810934	-	-	-
cg05669285	2.25537e-11	chr8	48873906	-	-	-
cg06825512	2.26699e-11	chr18	10453969	-	-	-
cg23014759	2.26789e-11	chr1	147059047	-	-	-
cg16876823	2.29829e-11	chr19	2987082	-	-	-
cg04322572	2.29918e-11	chr10	43447618	cg03325667	0.00563953	0.00217652
cg23624621	2.30066e-11	chr4	74731300	-	-	-
cg14916382	2.35585e-11	chr5	49962977	-	-	-
cg02768283	2.35989e-11	chr3	51573192	-	-	-
cg14986464	2.36392e-11	chr6	31669902	-	-	-
cg06238004	2.36898e-11	chr17	42029727	cg01703581	1.07074e-07	0.00138611
cg12085660	2.38032e-11	chr19	44124104	-	-	-
cg08318732	2.38763e-11	chr19	53192577	-	-	-
cg17942328	2.40919e-11	chr20	34542602	-	-	-
cg13573513	2.41688e-11	chr12	14996143	-	-	-
cg05437446	2.49449e-11	chr13	113622743	cg14864103	0.0431165	-0.00116571
cg05437446	2.49449e-11	chr13	113622743	cg19540316	0.0742945	-0.000968761
cg05437446	2.49449e-11	chr13	113622743	cg21090298	0.00494407	-0.00194187
cg11672277	2.49628e-11	chr18	32556104	-	-	-
cg14292870	2.54819e-11	chr12	6887543	-	-	-
cg15901783	2.54863e-11	chr13	77461426	cg20248204	0.0437725	0.00163713
cg11934832	2.5671e-11	chr18	45683841	-	-	-
cg07037725	2.57536e-11	chr5	141699580	-	-	-
cg26723524	2.58233e-11	chr7	39775803	-	-	-
cg24718903	2.59954e-11	chr19	50138797	cg08547432	1.88086e-06	0.00146165
cg14190522	2.6085e-11	chr9	124344221	-	-	-
cg11482879	2.65062e-11	chr17	4480083	-	-	-
cg05203213	2.67245e-11	chr2	73419551	-	-	-
cg06299037	2.75834e-11	chr19	40971696	-	-	-
cg04830409	2.77118e-11	chr12	64615927	-	-	-
cg27004669	2.77651e-11	chr22	28010598	-	-	-
cg00112238	2.84583e-11	chr1	54719938	-	-	-
cg00138497	2.85638e-11	chr9	139760673	-	-	-
cg13975062	2.86396e-11	chr3	108308228	-	-	-
cg19818308	2.87709e-11	chr14	75946745	-	-	-
cg08021348	2.88514e-11	chr2	20280676	-	-	-
cg15015109	2.91736e-11	chr17	65136480	-	-	-
cg11386376	2.92148e-11	chr1	55106106	-	-	-
cg03213259	2.92327e-11	chr16	67189948	cg16416152	3.8565e-08	0.00146585
cg03213259	2.92327e-11	chr16	67189948	cg05976840	0.00260157	0.00206602
cg11757040	2.94375e-11	chr14	73209188	cg13588403	0.00503961	0.00305508
cg08133584	2.9514e-11	chr16	609679	-	-	-
cg20525527	2.96235e-11	chr17	17056629	cg01890836	5.09569e-06	-0.00241789
cg13464062	2.97093e-11	chr7	33148868	-	-	-
cg20348196	2.97938e-11	chr6	32408284	cg17606183	0.000790895	-0.00277421
cg02815053	3.01455e-11	chr2	3381671	-	-	-
cg21574435	3.03579e-11	chr3	49027409	-	-	-
cg26957187	3.12013e-11	chr7	71799982	-	-	-
cg10494848	3.12508e-11	chr6	57127617	-	-	-
cg15542713	3.13926e-11	chr1	42385581	-	-	-
cg01234929	3.20105e-11	chr11	4115909	-	-	-
cg00771688	3.22415e-11	chr2	120124593	cg20863947	0.0288565	0.000337613
cg23987137	3.26344e-11	chr5	58653624	-	-	-
cg09119776	3.29266e-11	chr10	104387263	-	-	-
cg21175307	3.29382e-11	chr15	69110447	-	-	-
cg05217983	3.31024e-11	chr6	45406867	-	-	-
cg13586051	3.34957e-11	chr3	58200471	-	-	-
cg10619144	3.36481e-11	chr18	43677957	-	-	-
cg01083340	3.39276e-11	chr11	66176265	-	-	-
cg03531211	3.40343e-11	chr6	32920102	-	-	-
cg06088759	3.49222e-11	chr1	166890644	-	-	-
cg26047066	3.5181e-11	chr1	221069136	-	-	-
cg07664358	3.56444e-11	chr11	125439729	-	-	-
cg25431974	3.59583e-11	chr2	233352936	-	-	-
cg07858848	3.61637e-11	chr2	43087177	-	-	-
cg16092991	3.64077e-11	chr4	15004611	-	-	-
cg06357743	3.67363e-11	chr6	30041727	cg23752348	0.00139145	0.00228808
cg24044763	3.70028e-11	chr1	160370683	-	-	-
cg20864214	3.73337e-11	chr11	73054121	-	-	-
cg09296536	3.80346e-11	chr2	40392494	-	-	-
cg03463641	3.88954e-11	chr2	25565497	-	-	-
cg07087557	3.9437e-11	chr1	227128210	cg21261477	0.0833331	0.000315252
cg07087557	3.9437e-11	chr1	227128210	cg01811416	0.0250306	0.000495075
cg17615115	3.94427e-11	chr17	60905352	-	-	-
cg27649295	4.06704e-11	chr6	124125227	-	-	-
cg04952324	4.08678e-11	chr7	73727108	-	-	-
cg23780514	4.10304e-11	chr18	71959249	-	-	-
cg23863881	4.11451e-11	chr19	17622413	cg27467005	0.00588582	0.000486184
cg18949794	4.14948e-11	chr7	130123340	-	-	-
cg24498885	4.17399e-11	chr13	45770307	-	-	-
cg05204193	4.17924e-11	chrX	30904380	-	-	-
cg08745334	4.19696e-11	chr4	1754069	-	-	-
cg08351536	4.24423e-11	chr17	60885250	-	-	-
cg04453124	4.34495e-11	chr10	79596240	cg03110921	1.84634e-07	0.00460536
cg16045390	4.37415e-11	chr17	37896620	cg25038082	0.000104234	0.00251926
cg16045390	4.37415e-11	chr17	37896620	cg01692252	5.37933e-07	0.00454633
cg16045390	4.37415e-11	chr17	37896620	cg10516146	0.00679507	0.00176687
cg25049733	4.38331e-11	chr6	1987269	-	-	-
cg05358900	4.47901e-11	chr12	32553295	-	-	-
cg18462381	4.53369e-11	chr10	129536718	-	-	-
cg19816107	4.53489e-11	chr7	33101939	-	-	-
cg02876145	4.54794e-11	chr14	100842825	-	-	-
cg27106204	4.5815e-11	chr7	40905203	-	-	-
cg10377921	4.59571e-11	chr19	15391946	-	-	-
cg16310095	4.59898e-11	chr1	155952959	-	-	-
cg06067425	4.60253e-11	chr4	141418804	-	-	-
cg23415489	4.62229e-11	chr3	47324472	-	-	-
cg08854834	4.67845e-11	chr21	30517941	-	-	-
cg26525025	4.68275e-11	chr12	52521183	-	-	-
cg26897054	4.69883e-11	chr19	42721870	-	-	-
cg24265280	4.94013e-11	chr6	154832000	-	-	-
cg10905180	4.94984e-11	chr11	4701824	-	-	-
cg13601957	5.01376e-11	chr8	60218373	-	-	-
cg26188726	5.0554e-11	chr16	31225957	-	-	-
cg14535006	5.07846e-11	chr20	18448030	-	-	-
cg27554769	5.10749e-11	chr1	202896170	-	-	-
cg07157107	5.11272e-11	chr8	42623730	-	-	-
cg23409168	5.2297e-11	chr8	117101690	-	-	-
cg23610447	5.23627e-11	chr6	113650073	-	-	-
cg13912311	5.26573e-11	chr9	127265348	cg02835964	3.87289e-06	0.00342132
cg13912311	5.26573e-11	chr9	127265348	cg12490887	8.3503e-05	0.00282459
cg25425537	5.29562e-11	chr2	6910518	cg00931181	0.000627428	0.00354743
cg16459182	5.39715e-11	chr12	50236606	-	-	-
cg16963852	5.48201e-11	chr3	150479084	-	-	-
cg00232483	5.4904e-11	chr16	19849514	-	-	-
cg05840541	5.50968e-11	chr22	50482925	cg02879960	0.000191334	-0.00333423
cg13276306	5.53489e-11	chr8	108344200	-	-	-
cg12424598	5.53584e-11	chr1	151788227	-	-	-
cg21488617	5.58324e-11	chr1	38022586	cg21171625	0.0156334	0.00157368
cg08551248	5.59566e-11	chr1	40255129	-	-	-
cg16137564	5.61221e-11	chr14	89024217	-	-	-
cg00497630	5.62124e-11	chr17	26733052	-	-	-
cg18143792	5.67875e-11	chr1	26250290	cg16464704	6.46901e-08	0.00142498
cg17819250	5.68026e-11	chr8	36380237	-	-	-
cg12646642	5.69954e-11	chr1	44440766	-	-	-
cg13772414	5.73211e-11	chr2	222383060	-	-	-
cg13896106	5.74099e-11	chr17	72754589	-	-	-
cg03418876	5.78428e-11	chr17	48799340	-	-	-
cg25144135	5.81299e-11	chr1	1144012	-	-	-
cg11064797	5.82386e-11	chr5	141016628	cg26849931	4.00266e-06	0.00272833
cg19764555	5.83792e-11	chr11	62315119	cg22625903	2.11826e-05	0.000997879
cg18328933	5.86707e-11	chr3	52008538	-	-	-
cg06271067	5.92182e-11	chr2	225384862	-	-	-
cg18518916	5.96777e-11	chr4	185456125	-	-	-
cg17353337	5.98485e-11	chr6	138866898	cg24324628	0.0172629	0.00140374
cg17353337	5.98485e-11	chr6	138866898	cg13280041	0.161874	0.00103553
cg17353337	5.98485e-11	chr6	138866898	cg15962969	0.0217026	0.00170547
cg02532488	6.06312e-11	chr11	65343341	cg15217978	0.116683	0.000283153
cg00230074	6.07666e-11	chr17	72358042	cg11541486	0.0100122	0.00165879
cg00230074	6.07666e-11	chr17	72358042	cg10866062	0.00183868	0.00221542
cg00230074	6.07666e-11	chr17	72358042	cg08084655	0.00938242	0.0014754
cg25205758	6.09223e-11	chr6	144385672	-	-	-
cg10022533	6.10915e-11	chr1	236723124	-	-	-
cg17298925	6.13121e-11	chr5	6828054	-	-	-
cg07175580	6.15e-11	chr1	206971605	-	-	-
cg21369679	6.19192e-11	chr16	47007757	-	-	-
cg18147098	6.24343e-11	chr1	212688916	cg23075506	0.805643	0.000225584
cg06561216	6.32365e-11	chr7	44925251	-	-	-
cg19759478	6.37842e-11	chr1	112291876	-	-	-
cg14755009	6.40533e-11	chr11	126153305	-	-	-
cg05886811	6.44949e-11	chr6	17280740	cg04876424	6.43051e-06	0.00341709
cg13660719	6.48758e-11	chr6	30852963	cg17091577	0.00226933	0.00250313
cg13660719	6.48758e-11	chr6	30852963	cg15656686	0.00377885	0.00193947
cg13660719	6.48758e-11	chr6	30852963	cg26321999	0.00720272	0.00227845
cg13660719	6.48758e-11	chr6	30852963	cg09965419	0.0269787	0.00219275
cg13660719	6.48758e-11	chr6	30852963	cg07187855	0.0299187	0.00223981
cg13660719	6.48758e-11	chr6	30852963	cg24566261	0.0422052	0.00127303
cg07667560	6.50252e-11	chr19	42637805	-	-	-
cg18688599	6.50424e-11	chr5	10353401	-	-	-
cg26052635	6.52202e-11	chr2	29339307	-	-	-
cg24497897	6.56333e-11	chr11	65658826	-	-	-
cg12690119	6.57025e-11	chr3	141043080	-	-	-
cg25960854	6.62027e-11	chr19	1160184	-	-	-
cg18290775	6.72184e-11	chr14	69954135	-	-	-
cg18805457	6.8035e-11	chr5	145829759	-	-	-
cg10938046	6.8593e-11	chr6	43969577	-	-	-
cg06449094	6.86298e-11	chr11	822397	-	-	-
cg20075683	6.87508e-11	chr5	132083910	cg09884635	0.000394385	0.00297677
cg26581729	6.93721e-11	chr9	139939792	-	-	-
cg26966384	7.00215e-11	chr9	36190885	-	-	-
cg09697999	7.02157e-11	chr7	733198	cg09848638	0.00712087	0.00217561
cg13747794	7.04265e-11	chr15	78557094	-	-	-
cg15186869	7.05066e-11	chr14	93673274	-	-	-
cg06574296	7.06218e-11	chr2	239007919	cg15871206	0.00527553	-0.00295438
cg06574296	7.06218e-11	chr2	239007919	cg19391697	0.0166865	-0.00283436
cg02123534	7.07834e-11	chr7	965485	cg03634833	0.0305655	-0.00158621
cg24218077	7.13457e-11	chr11	125495856	-	-	-
cg00803638	7.14808e-11	chr6	35464304	cg04293930	3.92539e-06	0.00104644
cg07739604	7.16134e-11	chr12	124950990	-	-	-
cg25197194	7.45197e-11	chr3	128758787	-	-	-
cg15416442	7.50366e-11	chr14	59244557	-	-	-
cg13099892	7.51589e-11	chr4	174013995	-	-	-
cg00097536	7.52948e-11	chr2	43454476	-	-	-
cg02706110	7.5854e-11	chr22	24552132	-	-	-
cg20345948	7.65563e-11	chr4	2464014	-	-	-
cg19103704	7.68295e-11	chr19	40440963	-	-	-
cg15540623	7.73003e-11	chr12	52388221	-	-	-
cg08086221	7.83259e-11	chr19	48112482	-	-	-
cg22783262	8.02788e-11	chr22	45098346	-	-	-
cg01130991	8.33869e-11	chr17	46510392	-	-	-
cg11020853	8.34925e-11	chr3	43020564	cg12268888	0.000266204	0.000890604
cg08417338	8.48795e-11	chr15	43663582	-	-	-
cg02264407	8.62751e-11	chr13	76430665	-	-	-
cg03460756	8.64627e-11	chr17	45353128	-	-	-
cg09616559	8.67107e-11	chr2	25921151	-	-	-
cg10517535	8.70394e-11	chr17	9929698	-	-	-
cg11261958	8.75122e-11	chr3	118958539	-	-	-
cg07206725	8.79111e-11	chr5	133702808	-	-	-
cg04249586	8.836e-11	chr4	111119946	-	-	-
cg04348643	8.92389e-11	chr3	153572883	-	-	-
cg08100497	8.94594e-11	chr5	139422525	-	-	-
cg23887948	8.95441e-11	chr15	74494854	cg22672067	2.44893e-06	0.00385629
cg23887948	8.95441e-11	chr15	74494854	cg00075967	1.18855e-06	0.00443844
cg06991495	8.96965e-11	chr22	38714466	cg01441777	0.263521	0.000512014
cg06991495	8.96965e-11	chr22	38714466	cg10142237	0.391156	0.000403217
cg06991495	8.96965e-11	chr22	38714466	cg26449680	0.16499	0.000703073
cg03614189	8.97307e-11	chr8	82598326	-	-	-
cg27299047	8.99911e-11	chr7	2103248	-	-	-
cg08274637	9.06563e-11	chr13	51417923	cg20400592	0.00155619	0.00272737
cg08274637	9.06563e-11	chr13	51417923	cg27051129	0.0427087	0.0015624
cg08274637	9.06563e-11	chr13	51417923	cg05965387	0.00881762	0.00247031
cg12924588	9.08695e-11	chr2	68694517	-	-	-
cg13160963	9.20144e-11	chr6	11538582	-	-	-
cg13422817	9.23404e-11	chr12	4550927	-	-	-
cg06859463	9.27975e-11	chr11	46300215	-	-	-
cg18200741	9.27995e-11	chr2	33780366	-	-	-
cg03028337	9.36302e-11	chr2	56410087	cg06241374	0.00112394	0.00278376
cg04483863	9.79219e-11	chr5	173171737	-	-	-
cg01184449	9.92658e-11	chr2	42396170	-	-	-
cg24062472	9.97551e-11	chr9	100818849	-	-	-
cg15540144	1.01396e-10	chr2	99553141	-	-	-
cg04873053	1.01884e-10	chr1	53935918	-	-	-
cg01000831	1.02083e-10	chr10	73156460	-	-	-
cg18162477	1.02397e-10	chr1	24969428	-	-	-
cg04357965	1.02477e-10	chr5	77945347	-	-	-
cg22138096	1.04389e-10	chr7	41772439	-	-	-
cg26380291	1.04739e-10	chr10	114787843	-	-	-
cg19824006	1.05958e-10	chr2	200718119	cg17379405	3.01321e-07	-0.00506303
cg09523086	1.06178e-10	chr21	33984856	cg12922931	0.00832542	0.000387693
cg01252023	1.06595e-10	chr11	67207574	cg02222982	0.00270287	-0.001782
cg07129696	1.0666e-10	chr2	209119949	-	-	-
cg22926842	1.06948e-10	chr22	42336869	-	-	-
cg11953775	1.07646e-10	chr1	207597011	-	-	-
cg06536333	1.08311e-10	chr6	41339977	-	-	-
cg16824126	1.08478e-10	chr22	41626394	-	-	-
cg01586524	1.12815e-10	chr8	67341819	-	-	-
cg14223001	1.14499e-10	chr11	44978881	-	-	-
cg18714585	1.14925e-10	chr12	123868665	-	-	-
cg09360974	1.15723e-10	chr11	66496490	-	-	-
cg02056062	1.18616e-10	chr3	149374914	cg15043384	0.0107182	0.00250874
cg02056062	1.18616e-10	chr3	149374914	cg14557185	0.0273922	0.00333633
cg09430689	1.18626e-10	chr14	76127296	-	-	-
cg10394788	1.19156e-10	chr9	124360547	cg04661709	1.06618e-06	0.00607982
cg10665199	1.20907e-10	chr7	133106180	-	-	-
cg16205352	1.21079e-10	chr12	49688176	cg24059075	0.000859668	0.00215048
cg16205352	1.21079e-10	chr12	49688176	cg08812802	0.0329048	0.00168068
cg10783149	1.22241e-10	chr14	55707866	cg14035860	0.00105804	0.0039348
cg08049553	1.22932e-10	chr17	73257843	-	-	-
cg01243072	1.23147e-10	chr2	43398171	cg00360761	8.21789e-05	-0.00327347
cg01243072	1.23147e-10	chr2	43398171	cg07502661	0.0105784	-0.0016056
cg22573917	1.23453e-10	chr12	49371628	-	-	-
cg06219995	1.23865e-10	chr1	16374768	-	-	-
cg04738379	1.24596e-10	chr15	81282102	cg02643343	0.00139778	0.000869439
cg08302713	1.24839e-10	chr6	53409850	-	-	-
cg18789261	1.25846e-10	chr12	82752393	-	-	-
cg08640466	1.25943e-10	chr6	35153213	-	-	-
cg23091302	1.27498e-10	chr3	19389409	-	-	-
cg19000349	1.2764e-10	chr2	75061841	-	-	-
cg10147507	1.28044e-10	chr3	57113767	-	-	-
cg13692902	1.30899e-10	chr5	34915868	-	-	-
cg03371384	1.31208e-10	chr11	69260271	cg04729730	9.02311e-06	0.00144074
cg25149551	1.32487e-10	chr1	156897062	-	-	-
cg15165154	1.32654e-10	chr5	139041014	-	-	-
cg25287071	1.32781e-10	chr1	226878419	-	-	-
cg21422361	1.32992e-10	chr7	1884392	-	-	-
cg05871607	1.33663e-10	chr1	28241317	cg09844983	0.0148505	0.000445099
cg12991385	1.34104e-10	chr6	29599259	cg22679406	0.0475023	0.00162147
cg12991385	1.34104e-10	chr6	29599259	cg03127104	0.330133	0.000557718
cg12991385	1.34104e-10	chr6	29599259	cg17806418	0.131132	0.00136229
cg12991385	1.34104e-10	chr6	29599259	cg01765653	0.375867	0.000498512
cg12991385	1.34104e-10	chr6	29599259	cg20139800	0.210009	0.000774258
cg12991385	1.34104e-10	chr6	29599259	cg21644740	0.361395	0.000865493
cg12991385	1.34104e-10	chr6	29599259	cg12292060	0.0174395	0.00216536
cg01824466	1.34388e-10	chr8	95959531	-	-	-
cg02215171	1.35209e-10	chr4	89379156	-	-	-
cg14565151	1.36124e-10	chr12	95945384	-	-	-
cg20250874	1.3682e-10	chr13	47127354	-	-	-
cg04627240	1.38046e-10	chr19	42746847	-	-	-
cg14941466	1.38468e-10	chr18	66382226	-	-	-
cg08733960	1.38881e-10	chr6	52529248	-	-	-
cg16483490	1.3931e-10	chr2	111879711	-	-	-
cg10853063	1.42323e-10	chr12	120315422	cg19988880	0.00294822	0.000498425
cg14619949	1.43485e-10	chr5	76116169	cg00499700	0.0138405	-0.00151333
cg06362796	1.43981e-10	chr12	132196343	-	-	-
cg21222426	1.45573e-10	chr9	20339790	-	-	-
cg15677497	1.45624e-10	chr6	30585191	-	-	-
cg11824191	1.46031e-10	chr1	183274124	-	-	-
cg12843872	1.46484e-10	chr7	90894352	-	-	-
cg26915329	1.47586e-10	chr13	60033345	-	-	-
cg02691192	1.47642e-10	chr17	59693501	-	-	-
cg10089014	1.4775e-10	chr14	59950484	-	-	-
cg14640466	1.48854e-10	chr8	135056370	-	-	-
cg09555736	1.48958e-10	chr16	474271	cg02102075	0.00025753	-0.0032178
cg19734190	1.50279e-10	chr4	6993556	-	-	-
cg18089145	1.5177e-10	chr14	39572493	-	-	-
cg16776035	1.53642e-10	chr17	74542680	-	-	-
cg16192203	1.53679e-10	chr3	119217218	cg09157144	0.000495791	0.000872431
cg23786152	1.54349e-10	chr10	105610562	-	-	-
cg16449186	1.546e-10	chr3	186545470	-	-	-
cg15065896	1.59901e-10	chr3	37285038	-	-	-
cg05898524	1.60617e-10	chr1	156083276	-	-	-
cg02896465	1.61098e-10	chr19	11485452	-	-	-
cg25398580	1.61586e-10	chr12	88536147	-	-	-
cg10198479	1.63142e-10	chr16	85268435	-	-	-
cg12001357	1.64385e-10	chr2	233410852	cg12405341	5.55369e-09	0.00141386
cg12001357	1.64385e-10	chr2	233410852	cg05911928	2.36666e-07	0.00123139
cg12127149	1.66272e-10	chr14	102487020	-	-	-
cg01807919	1.66403e-10	chr17	7518403	-	-	-
cg02326058	1.6719e-10	chr8	8993102	-	-	-
cg11775492	1.68588e-10	chr12	51158663	-	-	-
cg22936253	1.687e-10	chr10	90752569	-	-	-
cg05969148	1.69241e-10	chr19	51307846	-	-	-
cg10712623	1.71473e-10	chr3	25469577	-	-	-
cg11739399	1.71975e-10	chr1	206669785	-	-	-
cg07075930	1.72261e-10	chr18	7567717	-	-	-
cg06550057	1.72341e-10	chr2	200336200	-	-	-
cg11810998	1.74105e-10	chr1	212819593	-	-	-
cg18891387	1.74573e-10	chr19	5903977	-	-	-
cg01312997	1.75206e-10	chr2	128180646	-	-	-
cg05897316	1.757e-10	chr3	40657497	-	-	-
cg09120934	1.75896e-10	chr11	120187999	-	-	-
cg19695978	1.77138e-10	chr15	70877381	-	-	-
cg03803818	1.80081e-10	chr12	110637414	-	-	-
cg04097131	1.81294e-10	chr6	15298461	-	-	-
cg00789034	1.85223e-10	chr6	158245090	-	-	-
cg16310045	1.85789e-10	chr10	114813758	-	-	-
cg00944421	1.86172e-10	chr16	68269483	cg01660934	0.000258125	0.0029718
cg00944421	1.86172e-10	chr16	68269483	cg22190721	0.0067197	0.00277113
cg00944421	1.86172e-10	chr16	68269483	cg05510337	2.05086e-10	-0.0035734
cg13597554	1.88043e-10	chr15	49732282	-	-	-
cg00032036	1.8858e-10	chr19	7600417	-	-	-
cg05902173	1.88748e-10	chr6	139013757	-	-	-
cg05294095	1.88943e-10	chr19	38865080	-	-	-
cg17494199	1.90903e-10	chr13	106834942	-	-	-
cg15260428	1.90957e-10	chr12	132381902	-	-	-
cg00501876	1.9266e-10	chr3	39193251	-	-	-
cg10265365	1.93102e-10	chr19	42827690	-	-	-
cg24927135	1.93701e-10	chr15	63449340	-	-	-
cg07352544	1.93893e-10	chr1	26126233	-	-	-
cg05544807	1.94825e-10	chr2	25475916	-	-	-
cg07503785	1.9514e-10	chr11	76033473	-	-	-
cg13928490	1.99263e-10	chr13	51640442	cg12006375	0.00248793	-0.00250095
cg05258935	2.00126e-10	chr19	39086923	cg02798280	0.0289559	0.00222039
cg26657240	2.00429e-10	chr15	81475061	-	-	-
cg07042014	2.00584e-10	chr14	24783620	-	-	-
cg14129664	2.0085e-10	chr19	42498319	-	-	-
cg08497766	2.03698e-10	chr10	6019877	-	-	-
cg26850469	2.03782e-10	chr3	53051694	-	-	-
cg10799440	2.04369e-10	chr8	120685686	-	-	-
cg01444716	2.04652e-10	chr20	11898557	cg04682802	0.0398278	-0.00167169
cg01444716	2.04652e-10	chr20	11898557	cg05822633	0.0248709	-0.00208907
cg01444716	2.04652e-10	chr20	11898557	cg19048331	1.89821e-07	-0.00591222
cg24939194	2.05731e-10	chr7	2563611	-	-	-
cg06000330	2.07231e-10	chr7	19183231	-	-	-
cg04691540	2.08284e-10	chr1	179198414	-	-	-
cg05591701	2.0912e-10	chr6	30569211	-	-	-
cg02438611	2.10005e-10	chr17	55828107	cg23679492	0.001278	0.00281421
cg01708636	2.10541e-10	chr4	166301085	-	-	-
cg21273029	2.12413e-10	chr6	149068556	-	-	-
cg25155396	2.12685e-10	chr6	7261525	-	-	-
cg18346576	2.13509e-10	chr2	27938071	-	-	-
cg16501436	2.14347e-10	chr6	32821039	cg01897517	0.00559271	0.000460948
cg16501436	2.14347e-10	chr6	32821039	cg20729846	0.00799419	0.000539084
cg02739013	2.1562e-10	chr4	114681314	-	-	-
cg00324693	2.158e-10	chr20	2821357	cg00231920	0.000104575	0.000915908
cg12113316	2.16859e-10	chr8	37729089	-	-	-
cg04348689	2.18905e-10	chr14	93765993	-	-	-
cg06525670	2.2086e-10	chr13	30528708	-	-	-
cg03495688	2.22571e-10	chr9	6007586	-	-	-
cg12784049	2.23902e-10	chr10	103893589	-	-	-
cg23288818	2.24019e-10	chr1	21671570	cg21820517	0.0184565	0.000446155
cg09569432	2.24838e-10	chr19	39826668	cg02436686	0.00857481	0.000554312
cg09569432	2.24838e-10	chr19	39826668	cg20650545	0.00160999	0.000552681
cg21092177	2.27754e-10	chr17	73128031	-	-	-
cg05475386	2.28258e-10	chr12	65723693	-	-	-
cg11033273	2.29126e-10	chr11	35966115	-	-	-
cg07256006	2.29155e-10	chr1	156182774	-	-	-
cg26915799	2.33239e-10	chr1	201852272	-	-	-
cg20019356	2.34494e-10	chr14	64764216	-	-	-
cg00541544	2.34795e-10	chr22	39150255	cg11086738	3.06288e-09	0.00154059
cg11043990	2.35213e-10	chr17	74235759	-	-	-
cg14034325	2.35578e-10	chr10	43891459	-	-	-
cg13941235	2.35997e-10	chr9	137270186	-	-	-
cg23386330	2.38979e-10	chr11	13977556	-	-	-
cg11025974	2.40164e-10	chr2	152830521	cg08719380	0.119907	0.000815091
cg12838168	2.41627e-10	chr3	194085842	-	-	-
cg16956745	2.45934e-10	chr1	36689900	-	-	-
cg22065124	2.46761e-10	chr13	73649955	-	-	-
cg23677657	2.49249e-10	chr7	96619076	-	-	-
cg11469321	2.51301e-10	chr4	104021294	-	-	-
cg14461963	2.51452e-10	chr10	12111049	-	-	-
cg24224803	2.53689e-10	chr6	160183104	-	-	-
cg02255004	2.5425e-10	chr4	80748660	-	-	-
cg08165151	2.54683e-10	chr6	88411075	-	-	-
cg24794206	2.58638e-10	chr6	155316492	-	-	-
cg02646021	2.60932e-10	chr2	223176846	-	-	-
cg18587063	2.61956e-10	chr11	122940457	-	-	-
cg21702128	2.62293e-10	chr5	142784721	cg17342132	5.78254e-08	-0.00401147
cg10438089	2.62425e-10	chr17	47818514	-	-	-
cg20540327	2.65542e-10	chr15	72668275	-	-	-
cg06942064	2.65595e-10	chr1	208417143	-	-	-
cg20023184	2.6946e-10	chr15	50150583	-	-	-
cg00098280	2.69806e-10	chr18	29523426	-	-	-
cg13754949	2.72165e-10	chr2	100105657	-	-	-
cg14789804	2.72221e-10	chr12	58087958	-	-	-
cg15630458	2.72711e-10	chr8	142986649	cg26542567	0.0362333	0.00162006
cg13823169	2.73723e-10	chr9	139776893	-	-	-
cg06690633	2.74871e-10	chr14	65438715	-	-	-
cg23230564	2.77032e-10	chr5	31470890	-	-	-
cg06362282	2.77854e-10	chr6	33245893	cg13882090	8.44183e-07	-0.0030906
cg06362282	2.77854e-10	chr6	33245893	cg17200690	8.00256e-05	-0.00271467
cg06362282	2.77854e-10	chr6	33245893	cg03108070	0.000388183	-0.00256103
cg06362282	2.77854e-10	chr6	33245893	cg21618521	0.00260119	-0.00207658
cg06362282	2.77854e-10	chr6	33245893	cg22878489	0.00558199	-0.00276973
cg08204702	2.78134e-10	chr5	59189849	-	-	-
cg05514299	2.80429e-10	chr17	74868670	-	-	-
cg10716612	2.81589e-10	chr4	184113429	-	-	-
cg07747571	2.83326e-10	chr3	12910409	-	-	-
cg17539315	2.84324e-10	chr12	50794919	cg18801245	0.01006	0.000463188
cg05518939	2.84366e-10	chr3	121554459	-	-	-
cg09244754	2.86976e-10	chr6	122792965	-	-	-
cg25437531	2.90564e-10	chr11	33880362	-	-	-
cg09259843	2.93011e-10	chr2	25452362	-	-	-
cg05100916	2.93852e-10	chr7	112090586	-	-	-
cg17272224	2.94355e-10	chr2	45237885	cg04364219	5.50275e-08	0.00443584
cg19351701	2.94979e-10	chr7	27212935	cg14935646	9.09154e-09	0.00527412
cg09109411	2.97698e-10	chr5	149319112	cg09646173	1.7281e-09	0.00492097
cg09898695	2.98081e-10	chr15	41135793	-	-	-
cg05707190	2.9812e-10	chr15	99558427	-	-	-
cg11286618	2.98332e-10	chr2	74685465	cg05591758	0.0197691	0.000338693
cg06927324	2.99009e-10	chr14	74111701	-	-	-
cg24803517	3.02452e-10	chr5	94621517	-	-	-
cg24561305	3.03298e-10	chr13	29149132	-	-	-
cg01912955	3.03426e-10	chr6	100906383	-	-	-
cg10350350	3.05012e-10	chr11	43983977	-	-	-
cg21184629	3.13685e-10	chr9	38621834	cg08577743	0.0208389	0.00051593
cg00216504	3.16682e-10	chr7	91763516	-	-	-
cg03609269	3.17605e-10	chr1	53393023	-	-	-
cg13149245	3.19007e-10	chr15	65105500	-	-	-
cg12897370	3.19371e-10	chr6	155055079	-	-	-
cg14773228	3.19392e-10	chr2	121627212	-	-	-
cg05674475	3.24906e-10	chr4	42154385	-	-	-
cg04332914	3.26831e-10	chr3	53381587	-	-	-
cg13265914	3.27612e-10	chr8	21999630	-	-	-
cg18125479	3.30318e-10	chr14	51411049	-	-	-
cg19352726	3.31038e-10	chr6	42757805	-	-	-
cg20739223	3.31201e-10	chr2	64371680	-	-	-
cg11753286	3.32778e-10	chr6	32164000	cg09756415	0.00984286	0.000423605
cg01739167	3.38199e-10	chr17	4806344	-	-	-
cg10308810	3.3835e-10	chr10	49514273	cg01512155	6.53005e-06	0.00294705
cg00982136	3.39252e-10	chr2	201726139	cg21990144	0.000111536	-0.00307821
cg09152866	3.40393e-10	chr6	11714562	-	-	-
cg21105928	3.40638e-10	chr15	40143956	-	-	-
cg10472651	3.40896e-10	chr16	66555859	-	-	-
cg09866743	3.41984e-10	chr3	35706038	-	-	-
cg15035133	3.42598e-10	chr22	37962637	-	-	-
cg15903213	3.44257e-10	chr10	43522190	-	-	-
cg11637191	3.47356e-10	chr1	231557525	-	-	-
cg06825833	3.47552e-10	chr13	111566802	-	-	-
cg02855778	3.48739e-10	chr7	157462914	-	-	-
cg12180253	3.49357e-10	chr19	3435746	-	-	-
cg26271591	3.50567e-10	chr2	178125956	-	-	-
cg22835157	3.50752e-10	chr15	41218352	-	-	-
cg03746015	3.51071e-10	chr16	11141000	-	-	-
cg01899130	3.55996e-10	chr14	55348681	-	-	-
cg26008908	3.56898e-10	chr12	120799332	-	-	-
cg26925644	3.59175e-10	chr11	118476517	cg27488648	3.06145e-06	0.00261988
cg12790037	3.62403e-10	chr3	37035117	-	-	-
cg04994481	3.62419e-10	chr14	65345381	cg00157987	1.54079e-08	0.00142969
cg16071359	3.64513e-10	chr2	169312933	-	-	-
cg07777703	3.65169e-10	chr17	40811829	-	-	-
cg21631918	3.66105e-10	chr15	74501549	cg24222546	0.013523	0.0019339
cg21631918	3.66105e-10	chr15	74501549	cg23719157	0.0308347	0.00203266
cg21849780	3.68174e-10	chr2	99226313	-	-	-
cg22845765	3.69567e-10	chr5	146970636	-	-	-
cg03801144	3.70514e-10	chr9	127951957	-	-	-
cg11371681	3.74963e-10	chr1	26606896	-	-	-
cg00383763	3.75417e-10	chr1	202682124	-	-	-
cg05670596	3.7622e-10	chr3	46448496	-	-	-
cg23037611	3.77663e-10	chr5	113697946	-	-	-
cg05382782	3.78899e-10	chr11	117801332	-	-	-
cg09197074	3.8525e-10	chr11	122933690	-	-	-
cg26347745	3.87405e-10	chr3	129159008	cg03061024	0.0393068	0.000287318
cg13752254	3.90263e-10	chr19	55940813	-	-	-
cg27506442	3.90294e-10	chr13	30948716	-	-	-
cg04165030	3.92256e-10	chr5	175843293	-	-	-
cg25612391	3.93015e-10	chr19	19216451	-	-	-
cg07133729	3.95882e-10	chr7	98977840	-	-	-
cg05910443	3.98857e-10	chr7	101688675	cg03310939	0.0176792	-0.00204587
cg16975959	4.00207e-10	chr2	223184510	-	-	-
cg04716261	4.02181e-10	chr1	2937999	-	-	-
cg14070755	4.02481e-10	chr2	238394933	-	-	-
cg25107978	4.07233e-10	chr12	57916571	cg14737592	0.00148451	0.000607545
cg08658594	4.10135e-10	chr12	11062035	-	-	-
cg11344692	4.12814e-10	chr8	61429175	-	-	-
cg16087527	4.14411e-10	chr10	978019	-	-	-
cg00569418	4.21456e-10	chr19	50192100	-	-	-
cg06577463	4.23236e-10	chr17	78120714	-	-	-
cg17192381	4.29979e-10	chr18	60792598	-	-	-
cg14518658	4.33388e-10	chr22	37726676	-	-	-
cg03494795	4.34094e-10	chr9	133710827	-	-	-
cg20566420	4.34135e-10	chr12	122327043	-	-	-
cg06651054	4.39617e-10	chr15	83680015	-	-	-
cg01891736	4.41253e-10	chr16	11655159	-	-	-
cg25735922	4.45754e-10	chr11	76432800	-	-	-
cg06214220	4.46293e-10	chr9	36400252	-	-	-
cg12796306	4.54517e-10	chr8	67406954	-	-	-
cg07434407	4.60489e-10	chr8	17941764	-	-	-
cg15131146	4.62716e-10	chr1	26101755	-	-	-
cg19115490	4.64017e-10	chr6	37483925	-	-	-
cg18765542	4.64051e-10	chr11	46354101	-	-	-
cg12927772	4.67703e-10	chr9	86571585	-	-	-
cg00410926	4.68895e-10	chr9	35563534	-	-	-
cg26033520	4.69286e-10	chr10	74004071	-	-	-
cg02361027	4.7313e-10	chr2	170217401	-	-	-
cg07217350	4.7968e-10	chr5	162934022	cg22017733	1.05928e-05	-0.00493938
cg27429749	4.83547e-10	chr11	57333612	-	-	-
cg26883033	4.86063e-10	chr10	80027004	cg10857905	8.53514e-08	0.00503753
cg19588519	4.90034e-10	chr10	125817817	-	-	-
cg13958614	4.95656e-10	chr5	72744196	-	-	-
cg07551659	4.96743e-10	chr15	57669165	-	-	-
cg18537222	4.96999e-10	chr3	12435731	-	-	-
cg18900591	4.98495e-10	chr20	50419193	cg19871388	0.0841542	0.00137784
cg18900591	4.98495e-10	chr20	50419193	cg04312620	0.0179482	0.00194858
cg05310240	4.98516e-10	chr17	47979069	-	-	-
cg16694480	4.98622e-10	chr1	19732786	-	-	-
cg01373189	5.00667e-10	chr13	33002820	-	-	-
cg04159302	5.01157e-10	chr5	150162068	-	-	-
cg08528970	5.0248e-10	chr4	76640579	-	-	-
cg05742294	5.03373e-10	chr8	124169368	-	-	-
cg04722901	5.12719e-10	chr5	16812392	-	-	-
cg05915362	5.1735e-10	chr6	159274480	cg11456838	7.30167e-07	0.0047751
cg15270851	5.18167e-10	chr13	111358291	-	-	-
cg23891487	5.19153e-10	chr12	93969700	cg07215749	2.04835e-07	0.00109507
cg05937055	5.1974e-10	chr1	181128764	-	-	-
cg00460983	5.21326e-10	chr10	91133941	-	-	-
cg24266651	5.2187e-10	chr11	7506655	-	-	-
cg09793866	5.23638e-10	chr8	38009548	-	-	-
cg05133578	5.29754e-10	chr12	46663407	-	-	-
cg06940720	5.30752e-10	chr5	1526929	-	-	-
cg21772826	5.32508e-10	chr3	189040394	-	-	-
cg00123478	5.37168e-10	chr4	10458165	-	-	-
cg18014844	5.419e-10	chr1	55230402	-	-	-
cg20236750	5.4239e-10	chr10	95516908	-	-	-
cg10120652	5.45553e-10	chr8	9182252	-	-	-
cg23815462	5.47692e-10	chr19	57923049	-	-	-
cg27359668	5.48057e-10	chr13	113673103	-	-	-
cg23067281	5.50363e-10	chr14	92980103	-	-	-
cg14836522	5.5208e-10	chr1	31375133	-	-	-
cg07724982	5.52351e-10	chr5	7869189	-	-	-
cg04073608	5.53765e-10	chr11	65268100	-	-	-
cg00592063	5.57037e-10	chr2	71295358	-	-	-
cg01715745	5.59949e-10	chr1	54930156	-	-	-
cg06620514	5.64416e-10	chr14	74793271	-	-	-
cg06767187	5.69296e-10	chr7	2640127	-	-	-
cg06732395	5.70491e-10	chr5	180018722	-	-	-
cg00041872	5.7198e-10	chr1	46632690	-	-	-
cg15054197	5.73647e-10	chr19	18433911	-	-	-
cg24045875	5.7718e-10	chr20	61425320	-	-	-
cg16020551	5.80087e-10	chr9	130890638	-	-	-
cg11945474	5.84529e-10	chr2	55717980	-	-	-
cg01523370	5.84705e-10	chr3	120068337	-	-	-
cg14310696	5.85534e-10	chr3	87276184	-	-	-
cg01519164	5.86425e-10	chr14	69619846	-	-	-
cg07176842	5.8661e-10	chr14	43972223	-	-	-
cg25820693	5.9045e-10	chr1	151119084	cg05622647	0.000598545	0.000652976
cg25820693	5.9045e-10	chr1	151119084	cg06179645	0.00162611	0.000645452
cg05584950	5.91174e-10	chr2	86012847	-	-	-
cg04425005	5.95643e-10	chr4	146783253	-	-	-
cg03587511	5.97055e-10	chr1	44115742	-	-	-
cg20292636	5.98403e-10	chr1	204328377	-	-	-
cg05890727	6.0096e-10	chr14	55764647	-	-	-
cg02736908	6.01029e-10	chr17	29887376	-	-	-
cg23032421	6.0248e-10	chr3	3152038	-	-	-
cg05955566	6.0795e-10	chr12	99038273	-	-	-
cg08726195	6.09118e-10	chr7	77427851	cg26358246	0.0485677	0.000317795
cg08726195	6.09118e-10	chr7	77427851	cg09856066	0.121879	0.000257114
cg14490972	6.14017e-10	chr6	43484812	cg17866734	0.0189718	0.000377559
cg21484940	6.15392e-10	chr7	48129992	cg10317717	0.0589071	0.0022645
cg21484940	6.15392e-10	chr7	48129992	cg22860780	2.24499e-08	0.00126706
cg21484940	6.15392e-10	chr7	48129992	cg07087130	0.101224	0.00134804
cg21484940	6.15392e-10	chr7	48129992	cg02399030	8.93157e-09	0.00115609
cg01044662	6.18081e-10	chr2	75938360	-	-	-
cg01946193	6.19067e-10	chr20	47895123	cg16704590	4.30636e-07	0.00376187
cg05452345	6.19592e-10	chr5	102455768	-	-	-
cg14265704	6.20448e-10	chr2	71131201	-	-	-
cg22086973	6.2298e-10	chr5	77590574	-	-	-
cg21035241	6.2304e-10	chr19	50168129	-	-	-
cg09258240	6.33185e-10	chr14	100613518	-	-	-
cg14333542	6.36783e-10	chr10	75647561	-	-	-
cg02256576	6.37251e-10	chr16	66995192	-	-	-
cg05563107	6.38089e-10	chr19	50528575	-	-	-
cg01824804	6.45054e-10	chr5	121413478	-	-	-
cg23741330	6.4509e-10	chr6	116832940	-	-	-
cg11294761	6.50312e-10	chr17	80275530	-	-	-
cg26688911	6.55263e-10	chr20	39969536	-	-	-
cg20794351	6.56914e-10	chr8	21908746	cg25460807	6.30736e-07	0.00422418
cg20794351	6.56914e-10	chr8	21908746	cg25875537	0.00125127	0.00170371
cg12962778	6.57634e-10	chr12	54778312	-	-	-
cg03087607	6.6036e-10	chr6	134210667	-	-	-
cg15626350	6.68159e-10	chr6	152130207	cg00601836	0.163503	0.00124402
cg11750756	6.70661e-10	chr12	50135418	-	-	-
cg15034393	6.7368e-10	chr3	152856773	-	-	-
cg09338033	6.817e-10	chr13	73633700	cg04339360	1.6021e-05	-0.00420334
cg10874314	6.85423e-10	chr10	129766623	-	-	-
cg01161725	6.86171e-10	chr18	32924152	-	-	-
cg01246266	6.87666e-10	chr17	76126490	cg16301617	7.75263e-09	-0.00387594
cg18341116	6.90272e-10	chr6	82957506	-	-	-
cg00796821	6.92849e-10	chr7	128551757	-	-	-
cg22539505	6.94132e-10	chr3	50330110	-	-	-
cg26656658	6.99649e-10	chr12	121615078	cg12121075	0.00612328	0.00221365
cg01790646	6.99887e-10	chr2	240321229	-	-	-
cg01037108	7.01263e-10	chr5	137911220	-	-	-
cg11789321	7.05046e-10	chr5	56773063	-	-	-
cg26468696	7.07868e-10	chr5	141331010	-	-	-
cg18369654	7.10888e-10	chr1	145417038	-	-	-
cg14521421	7.11771e-10	chr11	8862019	-	-	-
cg14015503	7.16226e-10	chr19	57862554	-	-	-
cg23355126	7.17468e-10	chr21	34852107	-	-	-
cg21223094	7.18031e-10	chr12	11975515	-	-	-
cg05484920	7.1907e-10	chr19	49588520	-	-	-
cg01599633	7.30961e-10	chr17	65372452	-	-	-
cg15103195	7.38151e-10	chr7	100797603	-	-	-
cg11442185	7.39494e-10	chr12	56693681	-	-	-
cg00570362	7.43696e-10	chr4	48344328	-	-	-
cg02564756	7.45617e-10	chr3	128902977	-	-	-
cg03303585	7.47599e-10	chr4	75585178	-	-	-
cg09133386	7.50442e-10	chr6	20404188	cg14751398	0.00600096	0.000537627
cg11886014	7.54628e-10	chr5	41904500	cg17720466	7.09712e-07	-0.00258399
cg11765288	7.55879e-10	chr7	18535767	-	-	-
cg03450829	7.60317e-10	chr11	1772468	-	-	-
cg25015038	7.63897e-10	chr14	89604062	-	-	-
cg00895196	7.64615e-10	chr6	22147182	-	-	-
cg18133934	7.66585e-10	chr22	23523310	-	-	-
cg12967093	7.68317e-10	chr2	218621493	-	-	-
cg00653609	7.72204e-10	chr6	39082964	-	-	-
cg26256521	7.73479e-10	chr14	105147537	-	-	-
cg13555278	7.73609e-10	chr1	26348484	-	-	-
cg07965894	7.77323e-10	chr3	44036453	-	-	-
cg24256946	7.7859e-10	chr19	796991	-	-	-
cg24727620	7.97512e-10	chr7	86781902	-	-	-
cg08594681	7.97882e-10	chr8	27468684	-	-	-
cg04376719	8.12456e-10	chr19	1028379	-	-	-
cg07658646	8.17974e-10	chr12	11002197	-	-	-
cg22732731	8.19341e-10	chr2	220491907	-	-	-
cg26129353	8.20417e-10	chr18	55316927	-	-	-
cg24890964	8.2454e-10	chr20	36153642	-	-	-
cg20155566	8.31306e-10	chr17	26926074	-	-	-
cg06388350	8.38406e-10	chr4	95334135	-	-	-
cg09068198	8.42771e-10	chr2	65357064	cg02258066	0.000214835	0.000688218
cg03875330	8.43236e-10	chr19	11455923	-	-	-
cg07562100	8.45961e-10	chr15	68569975	-	-	-
cg23425079	8.48808e-10	chr6	31703503	-	-	-
cg04702538	8.50487e-10	chr17	16318972	-	-	-
cg01974027	8.56739e-10	chr1	114694766	-	-	-
cg16666935	8.56832e-10	chr13	31736119	-	-	-
cg20930094	8.57939e-10	chr2	113522299	-	-	-
cg03462733	8.59294e-10	chr15	80445229	-	-	-
cg04784315	8.69457e-10	chr9	125797284	-	-	-
cg02619205	8.74341e-10	chr9	117157157	-	-	-
cg07471614	8.76155e-10	chr8	125855152	-	-	-
cg09167861	8.8386e-10	chrX	135251741	-	-	-
cg09636727	8.8523e-10	chr1	77477593	-	-	-
cg22998476	8.85302e-10	chr10	74058092	-	-	-
cg05076730	8.91401e-10	chr8	129060815	-	-	-
cg16129988	8.94089e-10	chr3	48647215	-	-	-
cg23378165	9.02598e-10	chr17	9550256	cg12130768	0.0161389	0.0017247
cg03680932	9.04199e-10	chr6	16306683	cg04330057	0.00252756	0.00280717
cg20679955	9.07218e-10	chr18	2846761	-	-	-
cg10416593	9.09471e-10	chr22	50966123	-	-	-
cg14372466	9.10865e-10	chr18	3448468	-	-	-
cg17606003	9.11488e-10	chr10	102989376	-	-	-
cg16300030	9.12518e-10	chr6	32908980	cg20392842	0.00393756	-0.00309442
cg16300030	9.12518e-10	chr6	32908980	cg22324029	0.0188276	-0.00239442
cg05729581	9.13888e-10	chr11	3078854	-	-	-
cg16092017	9.1496e-10	chr5	134827643	-	-	-
cg26706803	9.1544e-10	chr16	50293530	-	-	-
cg00986050	9.23263e-10	chr20	37376913	-	-	-
cg13677897	9.27405e-10	chr7	5570593	-	-	-
cg19802929	9.35657e-10	chr14	32396820	-	-	-
cg21132931	9.48235e-10	chr17	43138592	-	-	-
cg19205909	9.51452e-10	chr22	42353671	-	-	-
cg12976582	9.54804e-10	chr3	50359583	cg05118960	0.000205728	0.00376923
cg18604823	9.56565e-10	chr19	56687364	-	-	-
cg20384735	9.57148e-10	chr1	231376893	-	-	-
cg21291356	9.58979e-10	chr19	52692821	-	-	-
cg13670898	9.64007e-10	chr14	56792319	-	-	-
cg21269523	9.68691e-10	chr2	88927294	-	-	-
cg10211518	9.76121e-10	chr19	633735	-	-	-
cg14887509	9.79206e-10	chr1	27816781	-	-	-
cg24093139	9.80698e-10	chr17	74582379	-	-	-
cg00079598	9.81372e-10	chr11	123676903	-	-	-
cg02750385	9.8201e-10	chr13	41885554	-	-	-
cg05251190	9.86931e-10	chr10	104196206	-	-	-
cg14831266	9.87865e-10	chr1	33283905	-	-	-
cg05477463	9.93647e-10	chr16	67218055	-	-	-
cg19763699	1.00717e-09	chr10	17756784	-	-	-
cg22697136	1.01277e-09	chr1	11714248	-	-	-
cg17205324	1.01684e-09	chr14	23835595	cg18454133	0.000110968	0.00260469
cg08151281	1.02199e-09	chr1	167905380	-	-	-
cg01735318	1.02232e-09	chr2	24307664	-	-	-
cg14914519	1.02859e-09	chr17	14205882	cg10519417	6.29912e-08	0.00415698
cg02007567	1.03766e-09	chr16	10912696	cg09175009	0.0378168	0.000778047
cg25562664	1.03897e-09	chr3	119529148	-	-	-
cg07399288	1.04411e-09	chr7	66767504	-	-	-
cg07286341	1.04423e-09	chr5	176923805	-	-	-
cg27230009	1.04639e-09	chr3	11241399	-	-	-
cg07103201	1.05466e-09	chr17	20171047	-	-	-
cg00715988	1.05513e-09	chr14	96968640	-	-	-
cg08125972	1.05563e-09	chr19	36705377	cg10667810	4.57056e-08	-0.00245929
cg24625240	1.05643e-09	chr11	126081434	-	-	-
cg01961018	1.05826e-09	chr14	67999752	-	-	-
cg11368628	1.06019e-09	chr11	1856183	-	-	-
cg01937803	1.06109e-09	chr14	103605307	-	-	-
cg12893736	1.0626e-09	chr17	72429636	-	-	-
cg05779219	1.06333e-09	chr20	23032166	-	-	-
cg12819393	1.07187e-09	chr9	127240449	-	-	-
cg00088410	1.07481e-09	chr3	72621886	-	-	-
cg19604369	1.07973e-09	chr10	101604657	-	-	-
cg07567308	1.08196e-09	chr20	3149320	-	-	-
cg03828939	1.08507e-09	chr16	2525452	-	-	-
cg01596963	1.08827e-09	chr11	62455830	-	-	-
cg17622952	1.09079e-09	chr11	76025189	-	-	-
cg04539476	1.10336e-09	chr14	23351487	-	-	-
cg15481493	1.10855e-09	chr11	35133274	-	-	-
cg00306421	1.11203e-09	chr18	21033656	cg21515243	0.0010366	0.000810676
cg16465559	1.12397e-09	chr8	105502059	-	-	-
cg01693598	1.13062e-09	chr1	47998637	-	-	-
cg25047378	1.13344e-09	chr1	44412582	-	-	-
cg03753609	1.13501e-09	chr5	34656973	-	-	-
cg20414838	1.13751e-09	chr1	53704138	-	-	-
cg03443996	1.14482e-09	chr10	21784983	-	-	-
cg16600996	1.15193e-09	chr22	29699230	-	-	-
cg02678305	1.15359e-09	chr6	30460322	-	-	-
cg00431236	1.15407e-09	chr2	264988	-	-	-
cg03221914	1.15451e-09	chr6	27783331	cg10184431	0.0176857	0.00143974
cg08537737	1.15958e-09	chr8	70743047	-	-	-
cg01519238	1.17047e-09	chr8	145515711	-	-	-
cg11024464	1.17272e-09	chr3	119188307	-	-	-
cg23458168	1.17595e-09	chr19	30864867	-	-	-
cg17974142	1.17861e-09	chr3	113464438	-	-	-
cg22982536	1.18131e-09	chr13	24735537	-	-	-
cg00904823	1.18207e-09	chr10	112418708	-	-	-
cg18327994	1.18598e-09	chr9	132372705	-	-	-
cg27395342	1.18809e-09	chr8	13224310	-	-	-
cg08267038	1.18943e-09	chr3	113325595	-	-	-
cg05643110	1.19539e-09	chr3	155572308	-	-	-
cg11229872	1.19905e-09	chr2	175195899	-	-	-
cg04697265	1.20468e-09	chr11	130683700	-	-	-
cg00297680	1.21049e-09	chr19	36869860	-	-	-
cg11261575	1.21154e-09	chr12	113573751	-	-	-
cg11057205	1.21288e-09	chr8	134588243	-	-	-
cg16182479	1.21395e-09	chr17	41832466	-	-	-
cg13240639	1.22075e-09	chr22	30162856	-	-	-
cg10803034	1.2254e-09	chr11	3178188	-	-	-
cg24643922	1.22577e-09	chr10	134236975	-	-	-
cg04693721	1.22831e-09	chr12	58176694	-	-	-
cg24500630	1.25042e-09	chr11	110436181	-	-	-
cg27460715	1.25394e-09	chr7	73668680	-	-	-
cg01109464	1.26672e-09	chr15	60292819	-	-	-
cg21850518	1.26723e-09	chr17	42357520	-	-	-
cg03871267	1.30144e-09	chr5	67483475	-	-	-
cg02416781	1.30304e-09	chr5	82331856	-	-	-
cg18037230	1.30532e-09	chr19	33463091	-	-	-
cg05623562	1.30947e-09	chr18	77793509	-	-	-
cg10495047	1.31795e-09	chr5	139017667	-	-	-
cg04772086	1.32249e-09	chr1	51434994	-	-	-
cg02303505	1.32702e-09	chr8	91592157	-	-	-
cg06089988	1.33254e-09	chr1	153748485	-	-	-
cg05367661	1.33436e-09	chr7	48075128	-	-	-
cg13928411	1.34083e-09	chr16	22103791	-	-	-
cg11276388	1.34113e-09	chr6	12064975	-	-	-
cg12622986	1.34838e-09	chr9	135458173	-	-	-
cg02485566	1.35421e-09	chr7	153749759	-	-	-
cg06907842	1.36768e-09	chr18	42260451	-	-	-
cg03184439	1.36968e-09	chr17	73008867	-	-	-
cg15690598	1.37411e-09	chr8	134806615	-	-	-
cg07599713	1.37683e-09	chr6	91411191	-	-	-
cg02856070	1.38308e-09	chr11	65686288	-	-	-
cg06400699	1.3832e-09	chr1	228328509	-	-	-
cg05831672	1.38355e-09	chr10	103543172	-	-	-
cg13552866	1.38421e-09	chrX	15808408	-	-	-
cg12551813	1.39271e-09	chr1	200781121	-	-	-
cg15118447	1.39299e-09	chr6	159220343	-	-	-
cg10542027	1.39505e-09	chr5	78532229	cg09529537	0.0212419	0.000448003
cg00531307	1.39532e-09	chr14	50998683	-	-	-
cg14528881	1.39697e-09	chr13	113864354	-	-	-
cg08398371	1.39981e-09	chr19	41814839	-	-	-
cg13930468	1.40708e-09	chr4	18022372	-	-	-
cg04246167	1.40944e-09	chr3	58984465	-	-	-
cg11687746	1.4115e-09	chr2	88354768	-	-	-
cg21355487	1.41331e-09	chr10	49688893	-	-	-
cg02742969	1.42189e-09	chr5	172175604	-	-	-
cg20059928	1.42195e-09	chr15	40361485	-	-	-
cg12800962	1.42203e-09	chr20	48626437	-	-	-
cg23598480	1.42422e-09	chr2	60102800	-	-	-
cg16807061	1.42931e-09	chr17	2757748	-	-	-
cg04315264	1.43019e-09	chr6	35436252	-	-	-
cg27625732	1.43705e-09	chr9	131549075	-	-	-
cg23225147	1.43754e-09	chr11	2907754	-	-	-
cg20150667	1.44028e-09	chr10	102747550	cg04387475	0.000949166	0.00057938
cg19642148	1.4443e-09	chr3	47844666	-	-	-
cg22438324	1.4552e-09	chr14	20922915	cg21337430	0.00293474	0.000520085
cg04701628	1.46108e-09	chr16	31492263	-	-	-
cg05638787	1.46279e-09	chr15	41062273	-	-	-
cg05908442	1.46804e-09	chr15	77800637	-	-	-
cg19861824	1.46823e-09	chr4	16901058	-	-	-
cg12444076	1.47289e-09	chr21	45722068	-	-	-
cg07491676	1.4754e-09	chr15	76400783	-	-	-
cg05871254	1.47732e-09	chr17	14213225	-	-	-
cg13598881	1.48505e-09	chr6	2783665	-	-	-
cg02157224	1.49463e-09	chr8	38368889	-	-	-
cg19761245	1.5005e-09	chr4	41366989	-	-	-
cg09481121	1.51394e-09	chr5	78985425	-	-	-
cg02671806	1.52465e-09	chr15	65477420	-	-	-
cg24603481	1.53733e-09	chr1	44884784	-	-	-
cg11046380	1.53812e-09	chr2	172543743	-	-	-
cg23474268	1.54392e-09	chr19	19174709	-	-	-
cg18783055	1.55218e-09	chr6	88639609	-	-	-
cg09351035	1.55494e-09	chr11	748060	-	-	-
cg06808305	1.55509e-09	chr2	63270824	-	-	-
cg21205139	1.55913e-09	chr4	156681475	-	-	-
cg17696044	1.55967e-09	chr11	70449316	cg11155924	0.0614378	-0.00125858
cg13242895	1.5636e-09	chr1	216805707	-	-	-
cg20032723	1.56372e-09	chr11	126174041	-	-	-
cg00100012	1.56976e-09	chr20	37302983	cg08475379	0.0134268	0.000562382
cg00860322	1.57304e-09	chr5	54528989	-	-	-
cg24757978	1.58722e-09	chr3	69003455	-	-	-
cg11021222	1.5886e-09	chr12	97300417	-	-	-
cg16605127	1.59382e-09	chr19	10207191	-	-	-
cg18334681	1.5986e-09	chr6	132066129	-	-	-
cg03648361	1.6009e-09	chr17	73893010	-	-	-
cg21115120	1.60362e-09	chr5	157158441	-	-	-
cg04106903	1.60788e-09	chr1	67518745	cg06894381	0.000107323	0.000778464
cg24981400	1.61274e-09	chr2	100047526	-	-	-
cg11789444	1.63688e-09	chr3	119814398	-	-	-
cg06157335	1.63765e-09	chr1	53164003	-	-	-
cg00302793	1.6418e-09	chr4	102268125	-	-	-
cg16317457	1.64295e-09	chr11	123173103	-	-	-
cg21491967	1.64316e-09	chr6	156276515	-	-	-
cg18748332	1.65754e-09	chr12	54020076	-	-	-
cg10901633	1.66977e-09	chr3	4814459	-	-	-
cg08792677	1.67803e-09	chr11	75379173	-	-	-
cg27455781	1.68202e-09	chr15	65647600	-	-	-
cg21148128	1.68386e-09	chr6	135375750	-	-	-
cg04498971	1.70576e-09	chr17	56084468	-	-	-
cg24119607	1.71049e-09	chr5	139047739	-	-	-
cg09915703	1.71265e-09	chr11	62599750	-	-	-
cg13560200	1.72946e-09	chr7	44646066	-	-	-
cg07018087	1.72964e-09	chr5	170860508	-	-	-
cg05644480	1.73145e-09	chr19	45418020	-	-	-
cg08936794	1.73184e-09	chr1	43833873	-	-	-
cg03734391	1.73233e-09	chr19	56182200	-	-	-
cg00327947	1.73305e-09	chr16	85482849	-	-	-
cg16752400	1.73874e-09	chr8	66131741	-	-	-
cg14029001	1.73976e-09	chr6	41998500	-	-	-
cg18666075	1.74459e-09	chr3	156833184	-	-	-
cg18179833	1.74804e-09	chr5	112312951	-	-	-
cg00637802	1.7502e-09	chr12	113590234	-	-	-
cg26360924	1.75797e-09	chr1	118793005	-	-	-
cg09188980	1.7625e-09	chr11	14993378	cg25783352	0.000601298	0.00202887
cg09188980	1.7625e-09	chr11	14993378	cg02077276	2.32037e-05	0.0025268
cg09188980	1.7625e-09	chr11	14993378	cg05061471	0.000551345	0.00247416
cg08936785	1.76756e-09	chr1	117452320	-	-	-
cg18805835	1.77576e-09	chr5	138775054	-	-	-
cg02538833	1.7824e-09	chr1	9822207	-	-	-
cg08457898	1.78711e-09	chr19	15343786	-	-	-
cg07378091	1.80778e-09	chr19	12662277	cg12257625	0.000303545	0.000820185
cg13365543	1.81008e-09	chr11	9596475	cg27268513	0.0113883	0.000452255
cg19370084	1.81478e-09	chr12	125671504	-	-	-
cg00157359	1.81765e-09	chr11	66233183	-	-	-
cg25264101	1.81915e-09	chr19	14064374	-	-	-
cg27311092	1.82143e-09	chr16	19142612	-	-	-
cg22956598	1.82218e-09	chr17	13973019	-	-	-
cg12069248	1.82875e-09	chr11	65628378	cg22258976	0.00079334	0.000685296
cg12069248	1.82875e-09	chr11	65628378	cg04739401	0.00194038	0.000655185
cg09095222	1.832e-09	chr3	157816094	-	-	-
cg20824977	1.83287e-09	chr15	59978600	-	-	-
cg13443592	1.83653e-09	chr10	43429755	-	-	-
cg24807850	1.83977e-09	chr1	3165391	-	-	-
cg22171829	1.84616e-09	chr7	95225520	-	-	-
cg06649899	1.84652e-09	chr16	67261154	-	-	-
cg15370815	1.84727e-09	chr11	108093335	cg19288979	0.0163972	0.000366898
cg15370815	1.84727e-09	chr11	108093335	cg02105423	0.00756396	0.000467899
cg07615342	1.85803e-09	chr3	45266820	-	-	-
cg00980581	1.86257e-09	chr6	36238095	-	-	-
cg13770461	1.86369e-09	chr11	46016312	-	-	-
cg14178506	1.86389e-09	chr19	23456575	-	-	-
cg13993914	1.87911e-09	chr9	140165710	-	-	-
cg25213452	1.8858e-09	chr1	206630385	-	-	-
cg12996305	1.89233e-09	chr17	2295923	-	-	-
cg21605781	1.8951e-09	chr12	105630720	-	-	-
cg03445287	1.919e-09	chr8	21823731	cg02889774	3.93981e-06	-0.0032514
cg22810489	1.92406e-09	chr19	45927585	-	-	-
cg05021842	1.92746e-09	chr19	3464940	cg11344997	0.0537118	0.00209224
cg24220767	1.9316e-09	chr4	186317793	cg06277849	5.85998e-10	-0.00379244
cg00238994	1.9325e-09	chr19	2977310	-	-	-
cg05699921	1.93462e-09	chr1	205286927	-	-	-
cg22033281	1.93737e-09	chr11	111325754	-	-	-
cg01407900	1.93778e-09	chr16	56965658	-	-	-
cg09726654	1.94119e-09	chr2	158114268	cg20469837	0.00112413	0.00154811
cg16236770	1.9425e-09	chr11	62573142	-	-	-
cg09418618	1.94802e-09	chr8	75266264	-	-	-
cg17879376	1.95138e-09	chr1	32212024	-	-	-
cg26349332	1.9527e-09	chr9	37592199	-	-	-
cg01682285	1.95594e-09	chr14	81422160	-	-	-
cg11038280	1.95619e-09	chr7	92466132	-	-	-
cg12883980	1.96078e-09	chr13	50707586	cg08004525	1.31646e-07	0.00534181
cg12883980	1.96078e-09	chr13	50707586	cg13204699	3.18899e-06	0.00423527
cg08461772	1.97387e-09	chr7	95026248	-	-	-
cg24260323	1.9773e-09	chr15	47497566	-	-	-
cg10533282	1.97905e-09	chr15	99602454	-	-	-
cg25840210	2.00595e-09	chr13	45152287	-	-	-
cg08683249	2.00858e-09	chr6	43612627	-	-	-
cg24123198	2.01059e-09	chr4	184018031	cg01278041	0.000337532	0.0024666
cg15843331	2.01588e-09	chr11	61063144	-	-	-
cg10789050	2.0199e-09	chr3	31713847	-	-	-
cg02036581	2.02336e-09	chr19	1267269	-	-	-
cg20287514	2.02779e-09	chr1	25869837	cg10867751	1.21251e-08	-0.00317721
cg26163284	2.02964e-09	chr19	42787174	-	-	-
cg08356262	2.03178e-09	chr5	75838704	-	-	-
cg06193393	2.03312e-09	chr7	99869454	-	-	-
cg26247064	2.0391e-09	chr11	74466198	-	-	-
cg11177833	2.04057e-09	chr17	4692377	-	-	-
cg24980765	2.0497e-09	chr3	122378918	-	-	-
cg11425280	2.05105e-09	chr12	104851172	-	-	-
cg21399717	2.06136e-09	chr8	102263157	-	-	-
cg27200267	2.06172e-09	chr12	1726059	-	-	-
cg25198784	2.06192e-09	chr6	99963468	-	-	-
cg09549591	2.06488e-09	chr11	11523491	-	-	-
cg20612002	2.0692e-09	chr15	48470256	-	-	-
cg19653589	2.07044e-09	chr19	2614177	-	-	-
cg04157161	2.07211e-09	chr17	7906847	-	-	-
cg10700334	2.08482e-09	chr3	118753610	-	-	-
cg18502630	2.0859e-09	chr9	139871955	-	-	-
cg05151228	2.09356e-09	chr1	110752952	-	-	-
cg02760293	2.10114e-09	chr5	146258785	-	-	-
cg15961693	2.10141e-09	chr6	139689053	-	-	-
cg13647973	2.10775e-09	chr19	56061337	-	-	-
cg06442489	2.10907e-09	chr19	58630612	-	-	-
cg02598224	2.11225e-09	chr2	97001430	-	-	-
cg10575219	2.11937e-09	chr7	105313992	-	-	-
cg25565476	2.1258e-09	chr7	106270744	-	-	-
cg15721359	2.12862e-09	chr13	52699305	-	-	-
cg15235185	2.13229e-09	chr1	193028809	-	-	-
cg06489653	2.13621e-09	chr2	99061716	-	-	-
cg05562817	2.14112e-09	chr19	51871466	-	-	-
cg03670158	2.14484e-09	chr17	41323431	-	-	-
cg15131784	2.14585e-09	chr3	139108705	-	-	-
cg17066620	2.15386e-09	chr22	37882518	-	-	-
cg21904489	2.1575e-09	chr3	119071213	-	-	-
cg25605289	2.16617e-09	chr1	151974222	-	-	-
cg00883212	2.16931e-09	chr2	173795201	-	-	-
cg06513659	2.17871e-09	chr17	74448689	-	-	-
cg01618834	2.18925e-09	chr6	31633788	cg24682634	0.00846529	0.000447682
cg01618834	2.18925e-09	chr6	31633788	cg24277128	0.0196387	0.000462363
cg17499941	2.19356e-09	chr5	87975812	cg04819775	5.81941e-06	0.00202187
cg09868597	2.20315e-09	chr5	112849442	-	-	-
cg07223240	2.2127e-09	chr6	170468271	-	-	-
cg17839611	2.22288e-09	chr17	47286802	-	-	-
cg13359765	2.22346e-09	chr1	234350988	-	-	-
cg22398616	2.22553e-09	chr13	53314203	-	-	-
cg13626632	2.24605e-09	chr9	124131165	cg05939335	5.10141e-07	0.00123986
cg04088152	2.24695e-09	chr1	6062462	-	-	-
cg06690760	2.27511e-09	chr3	71631298	cg06479142	4.83649e-06	-0.00383226
cg05175466	2.27926e-09	chr13	52586483	cg07148139	0.000439205	0.00082474
cg04052570	2.28333e-09	chr14	88459528	-	-	-
cg02108176	2.2844e-09	chr1	22109593	-	-	-
cg01045622	2.29804e-09	chr10	79686064	-	-	-
cg16322208	2.30245e-09	chr19	2151722	-	-	-
cg09220816	2.30705e-09	chr16	30546310	-	-	-
cg27246744	2.31931e-09	chr3	31746590	-	-	-
cg07516483	2.32367e-09	chr8	77586264	-	-	-
cg04522045	2.32994e-09	chr2	172958324	cg08508041	4.40235e-05	0.00105094
cg01745867	2.33592e-09	chr6	30710816	-	-	-
cg14560064	2.34073e-09	chr9	125675653	-	-	-
cg17308417	2.34481e-09	chr6	33422190	cg24891034	0.00171901	0.000604861
cg07841367	2.36812e-09	chr1	31538636	-	-	-
cg15433297	2.37192e-09	chr8	110374792	-	-	-
cg12495954	2.38333e-09	chr16	53738234	-	-	-
cg10495393	2.40415e-09	chr2	208402967	-	-	-
cg07011168	2.405e-09	chr10	49797259	-	-	-
cg01833485	2.4076e-09	chr1	216860692	-	-	-
cg09278276	2.40876e-09	chr11	66384033	cg18130076	0.00795338	0.000403732
cg10784813	2.40934e-09	chr16	11348678	cg03014241	0.00109273	0.00230121
cg04772575	2.4114e-09	chr12	123431865	-	-	-
cg00533649	2.42019e-09	chr19	42431930	-	-	-
cg23087306	2.42479e-09	chr10	119294055	-	-	-
cg25839330	2.42563e-09	chr3	40351130	-	-	-
cg03364781	2.42694e-09	chr4	113298593	-	-	-
cg25095518	2.42747e-09	chr2	98329337	-	-	-
cg15455772	2.44064e-09	chr8	33269701	-	-	-
cg16047471	2.44363e-09	chr12	26274563	-	-	-
cg08453968	2.44428e-09	chr20	23331934	-	-	-
cg08743556	2.45384e-09	chr8	125487621	-	-	-
cg09364089	2.45605e-09	chr1	92948788	-	-	-
cg21626848	2.46434e-09	chr17	39969267	-	-	-
cg00478326	2.47034e-09	chr15	78978136	-	-	-
cg11639692	2.47554e-09	chr3	42543933	-	-	-
cg06599908	2.50902e-09	chr19	54931632	-	-	-
cg21117978	2.51404e-09	chr2	64957132	-	-	-
cg14537243	2.52224e-09	chr17	66193605	cg18585273	0.0130607	0.000456374
cg16739178	2.52926e-09	chr16	85470674	-	-	-
cg25984423	2.54281e-09	chr4	4250135	-	-	-
cg26771557	2.56231e-09	chr17	16955261	-	-	-
cg11789681	2.57324e-09	chr15	74046708	-	-	-
cg04237075	2.58124e-09	chr9	34637949	-	-	-
cg26430116	2.59198e-09	chr6	42989600	-	-	-
cg07113549	2.60451e-09	chr3	98312651	cg24998020	0.00618394	0.000678248
cg09404429	2.60839e-09	chr17	21367130	-	-	-
cg23586138	2.60886e-09	chr2	27719544	-	-	-
cg01840575	2.62042e-09	chr2	38977957	-	-	-
cg08972170	2.62933e-09	chr7	30185776	-	-	-
cg26682661	2.65308e-09	chr3	38561466	-	-	-
cg02484274	2.66082e-09	chr4	122618147	-	-	-
cg05598064	2.66135e-09	chr1	39339225	-	-	-
cg26691175	2.6655e-09	chr1	229761129	-	-	-
cg00151922	2.67956e-09	chr20	10652103	-	-	-
cg19486048	2.68557e-09	chr8	141521216	-	-	-
cg24449091	2.69177e-09	chr1	167773027	-	-	-
cg24674640	2.69772e-09	chr7	104628750	-	-	-
cg03705947	2.74669e-09	chr1	68152081	-	-	-
cg03341377	2.74724e-09	chr3	39309355	-	-	-
cg08857478	2.75156e-09	chr17	74722826	-	-	-
cg23431730	2.75343e-09	chr12	53887070	-	-	-
cg08873779	2.7584e-09	chr16	88772658	-	-	-
cg18358061	2.75954e-09	chr3	134126698	-	-	-
cg18491775	2.77223e-09	chr10	76586186	-	-	-
cg14629287	2.78025e-09	chr6	29716767	-	-	-
cg05096634	2.7843e-09	chr6	138483208	cg13096541	0.0121691	0.000615649
cg04897804	2.7867e-09	chr5	157078629	-	-	-
cg14421700	2.79775e-09	chr17	77755965	cg22892904	4.25389e-06	0.00390533
cg26681847	2.79887e-09	chr11	120208749	-	-	-
cg25568716	2.81842e-09	chr11	16760490	-	-	-
cg22959236	2.81913e-09	chr5	52856869	-	-	-
cg27275941	2.82406e-09	chr3	15751015	-	-	-
cg27544190	2.82658e-09	chr21	33785434	cg14442408	0.00334706	0.00140922
cg27049201	2.83402e-09	chr7	128695169	-	-	-
cg13167562	2.83937e-09	chr2	102972315	-	-	-
cg09260830	2.84001e-09	chr9	80263587	-	-	-
cg23083424	2.85174e-09	chr10	75415875	-	-	-
cg00591515	2.85437e-09	chr19	54971526	-	-	-
cg24067118	2.86327e-09	chr10	102806933	cg04270401	0.238686	0.00084639
cg13393195	2.86766e-09	chr12	113659153	-	-	-
cg12339328	2.87479e-09	chr20	18491484	-	-	-
cg05354989	2.88273e-09	chr17	56429503	-	-	-
cg23015991	2.88358e-09	chr12	20556313	-	-	-
cg06984657	2.88689e-09	chr6	43597208	-	-	-
cg06096913	2.89168e-09	chr13	43230376	-	-	-
cg24737900	2.91245e-09	chr17	72869117	-	-	-
cg23846443	2.91897e-09	chr6	155777949	-	-	-
cg15700989	2.92229e-09	chr17	79442098	-	-	-
cg22441846	2.92836e-09	chr4	159694181	-	-	-
cg17254383	2.93326e-09	chr17	53363128	-	-	-
[truncated: 1,819 more rows]

## Sheet: Supp Table 5
110 maternal smoking associated DMPs were identified at a threshold of P < 1x10-7. Genomic locations are based on hg19.
ProbeID	EWAS of maternal smoking		Chr	Pos	Gene Annotation		PACE consoritum EWAS of Sustained Smoking in Newborns
	P-value	Regression coefficient			UCSC RefGene Name	UCSC RefGene Group	Regression coefficient	P-value
cg00213123	1.22342e-12	0.0172629	chr15	75019070	CYP1A1	TSS1500	0.012	2.02e-22
cg00253658	7.881e-20	0.0465147	chr16	54210496			0.043	7.18e-37
cg00501876	5.00188e-11	-0.0116271	chr3	39193251	CSRNP1	5'UTR	NA	NA
cg00930606	1.07899e-08	-0.0122499	chr22	31740944	PATZ1;PATZ1;PATZ1;PATZ1	1stExon;1stExon;1stExon;1stExon	-0.009	6.12e-13
cg01359532	1.23478e-12	0.01744	chr15	75045126	CYP1A2	Body	0.015	3.27e-23
cg01668281	8.72411e-09	-0.0154734	chr21	37915281	CLDN14;CLDN14	5'UTR;TSS1500	-0.01	1.37e-12
cg01952185	8.18668e-23	0.041061	chr5	134813213			0.029	8.67e-27
cg01970407	1.53614e-09	0.0177331	chr5	323320	AHRR	Body	0.014	6.8e-20
cg02574073	1.22083e-10	0.0333431	chr17	46682398	LOC404266;LOC404266;HOXB6	Body;Body;TSS200	0.019	3.26e-06
cg02583484	2.65041e-12	-0.0174078	chr12	54677008	HNRNPA1;HNRPA1L-2;HNRNPA1	Body;Body;Body	-0.006	6.32e-15
cg03043406	7.40473e-09	-0.0182852	chr1	45242356	RPS8;SNORD38A	Body;TSS1500	-0.008	0.000182
cg03769939	5.01867e-08	-0.0149245	chr1	25254129	RUNX3;RUNX3	Body;Body	-0.006	0.000263
cg03991871	6.41414e-08	-0.0237548	chr5	368447	AHRR	Body	-0.015	3.63e-27
cg04180046	2.55579e-42	0.0676424	chr7	45002736	MYO1G	Body	0.05	4.18e-124
cg04224247	2.89741e-15	-0.0293341	chrX	9984515	WWC3	5'UTR	NA	NA
cg04359840	7.69567e-08	-0.0142417	chr16	17563300	XYLT1	Body	-0.011	2.52e-09
cg04459939	1.08873e-09	0.0242312	chr15	90291141			0.023	1.66e-13
cg04535902	9.12962e-11	-0.0462931	chr1	92947332	GFI1;GFI1;GFI1	Body;Body;Body	-0.024	1.39e-22
cg04598670	5.30626e-10	-0.0193059	chr7	68697651			-0.024	5.35e-24
cg05174975	1.72851e-09	-0.0145575	chr17	37008030	RPL23	Body	-0.008	7.44e-08
cg05348875	1.22395e-09	-0.0390521	chr2	206628625	NRP2;NRP2;NRP2;NRP2;NRP2	Body;Body;Body;Body;Body	-0.026	1.13e-10
cg05549655	1.91289e-27	0.0329647	chr15	75019143	CYP1A1	TSS1500	0.019	1.08e-49
cg05575921	1.44385e-107	-0.0792246	chr5	373378	AHRR	Body	-0.064	1.64e-193
cg05888755	6.28471e-09	0.025174	chr17	46682319	LOC404266;LOC404266;HOXB6;HOXB6	Body;Body;1stExon;5'UTR	NA	NA
cg05928290	3.75388e-08	0.028296	chr14	54418728	BMP4;BMP4;BMP4	Body;Body;Body	0.024	1.48e-19
cg06235438	8.74851e-14	-0.0146093	chr16	30485966	ITGAL;ITGAL	Body;Body	-0.005	1.09e-07
cg06338710	5.10709e-12	-0.0647569	chr1	92946187	GFI1;GFI1;GFI1	Body;Body;Body	-0.037	5.56e-49
cg07069636	3.13577e-08	-0.0117304	chr16	30671749			-0.007	1.37e-09
cg07243147	9.67786e-08	-0.0130506	chr7	150744274	ACCN3;ACCN3;ABCB8;ACCN3	TSS1500;TSS1500;3'UTR;TSS1500	NA	NA
cg07339236	7.83208e-15	-0.0211864	chr20	50312490	ATP9A	Body	-0.013	1.39e-48
cg07742396	1.2379e-08	-0.0111883	chr1	27853060			-0.007	5.78e-09
cg08553327	1.7e-08	-0.0122911	chr6	31543647	TNF	1stExon	NA	NA
cg09662411	1.62725e-20	-0.0730992	chr1	92946132	GFI1;GFI1;GFI1	Body;Body;Body	-0.054	6.35e-76
cg09935388	1.49532e-48	-0.115287	chr1	92947588	GFI1;GFI1;GFI1	Body;Body;Body	-0.099	6.61e-111
cg10145533	3.48272e-08	0.019217	chr8	20350779			0.018	4.46e-08
cg10187927	5.27834e-08	0.0171594	chr5	135364060	TGFBI	TSS1500	0.013	3e-12
cg10239319	1.09631e-09	-0.0193675	chr4	6073656	JAKMIP1;JAKMIP1	Body;Body	NA	NA
cg10312186	1.25515e-08	-0.02243	chr6	170403583			-0.018	4.42e-21
cg10399789	2.15733e-08	-0.0390459	chr1	92945668	GFI1;GFI1;GFI1	Body;Body;Body	-0.026	1.17e-34
cg10520740	1.56396e-13	-0.0161867	chr12	1952798	CACNA2D4	Body	-0.011	6.08e-18
cg10673740	2.93323e-09	0.0183537	chr10	121411826	BAG3	Body	0.009	1.05e-09
cg10841124	2.56776e-08	0.0103346	chr5	433274	AHRR	Body	0.005	7.11e-09
cg10855531	3.21438e-09	-0.0156272	chr2	62702472			-0.007	1.77e-06
cg10906729	8.24697e-12	0.0308412	chr17	46682390	LOC404266;LOC404266;HOXB6	Body;Body;TSS200	0.016	4.32e-06
cg11207515	3.38908e-12	-0.0257535	chr7	146904205	CNTNAP2	Body	-0.023	1.93e-17
cg11429111	8.42181e-22	0.0382798	chr5	134813329			0.03	8.81e-34
cg11641006	7.27722e-15	0.0272724	chr2	235213874			0.019	5.01e-16
cg11813497	2.75172e-26	0.03703	chr10	14372879	FRMD4A	TSS200	0.027	1.88e-37
cg11902777	1.82323e-11	-0.00802095	chr5	368843	AHRR	Body	-0.007	6.09e-43
cg11924019	2.9857e-22	0.0352025	chr15	75019283	CYP1A1	TSS1500	0.025	1.19e-47
cg12101586	3.86331e-25	0.0488816	chr15	75019203	CYP1A1	TSS1500	0.045	3.67e-50
cg12803068	2.10611e-47	0.0808848	chr7	45002919	MYO1G	Body	0.07	2.64e-134
cg12806681	1.11153e-08	-0.0189739	chr5	368394	AHRR	Body	-0.01	4.44e-20
cg12876356	4.23909e-33	-0.124379	chr1	92946825	GFI1;GFI1;GFI1	Body;Body;Body	-0.094	8.35e-99
cg13279811	2.81622e-13	-0.0219989	chr3	24725365			-0.012	1.19e-09
cg13547053	3.17155e-08	0.0129574	chr2	179184864	OSBPL6;OSBPL6	TSS200;Body	0.013	2.11e-18
cg13570656	9.66408e-22	0.0469343	chr15	75019196	CYP1A1	TSS1500	0.047	6.31e-41
cg13784312	1.92768e-09	-0.0178949	chr9	134609065	RAPGEF1	Body	-0.016	1.63e-15
cg13834112	8.11872e-10	0.020484	chr15	90361639			0.022	6.33e-25
cg14157435	2.85233e-10	-0.0424911	chr2	206628692	NRP2;NRP2;NRP2;NRP2;NRP2	Body;Body;Body;Body;Body	-0.028	1.61e-10
cg14179389	7.07178e-45	-0.0769359	chr1	92947961	GFI1;GFI1;GFI1	Body;Body;Body	-0.068	2.79e-101
cg14565151	1.76443e-08	0.0156877	chr12	95945384	USP44	TSS200	0.014	4.27e-10
cg14736365	1.16793e-09	0.0231027	chr5	173947646			0.02	9.06e-17
cg14817490	1.15047e-09	-0.0169487	chr5	392920	AHRR	Body	-0.015	3.13e-14
cg15016771	6.48992e-11	0.0246091	chr2	235403218	ARL4C;ARL4C	3'UTR;1stExon	0.013	7.98e-07
cg15507334	4.36615e-27	0.0310666	chr10	14372913	FRMD4A	TSS200	0.02	8.96e-34
cg15578140	1.67466e-10	0.0158431	chr7	147718109	MIR548F3;CNTNAP2	Body;Body	0.016	1.54e-21
cg15892280	1.44315e-12	-0.0171444	chr21	40180000	ETS2	5'UTR	-0.011	1e-13
cg16057408	1.74715e-08	0.0127774	chr14	101196998	DLK1	Body	NA	NA
cg16255816	2.28235e-08	-0.01251	chr17	39889811	HAP1;HAP1;HAP1	Body;Body;Body	-0.005	1.2e-09
cg16331632	5.81971e-08	0.0154014	chr14	60783238			0.007	0.000129
cg16517298	3.57738e-12	-0.0248796	chr1	230413174	GALNT2	Body	-0.023	3.24e-13
cg16848873	4.81747e-13	0.0334539	chr17	46682308	LOC404266;LOC404266;HOXB6;HOXB6	Body;Body;1stExon;5'UTR	0.012	6.44e-05
cg17852385	8.73944e-11	0.0227013	chr15	75019188	CYP1A1	TSS1500	0.014	7.3e-18
cg17924476	5.26626e-15	0.0306535	chr5	323794	AHRR	Body	0.019	8.8e-23
cg18092474	1.38141e-23	0.0531584	chr15	75019302	CYP1A1	TSS1500	0.052	8.13e-51
cg18096987	2.03022e-09	-0.013865	chr3	11623873	VGLL4;VGLL4;VGLL4	Body;TSS200;Body	-0.017	5.65e-23
cg18146737	9.25128e-28	-0.110821	chr1	92946700	GFI1;GFI1;GFI1	Body;Body;Body	-0.094	6.14e-91
cg18316974	4.60305e-22	-0.086458	chr1	92947035	GFI1;GFI1;GFI1	Body;Body;Body	-0.052	1.47e-67
cg18473733	6.19453e-11	-0.0143634	chr19	16437362	KLF2	Body	-0.01	5.18e-15
cg18493761	1.85561e-09	0.0267097	chr11	125386885			0.025	9.32e-20
cg18680834	2.62945e-08	0.017833	chr19	30863349	ZNF536;ZNF536	1stExon;5'UTR	0.009	1.14e-05
cg18684142	3.82435e-09	0.0338312	chr17	46682394	LOC404266;LOC404266;HOXB6	Body;Body;TSS200	0.021	1.21e-06
cg18703066	2.02904e-17	-0.0168648	chr2	105363536			-0.008	4.63e-29
cg19089201	1.27499e-22	0.0365344	chr7	45002287	MYO1G	3'UTR	0.019	3.56e-78
cg20344448	6.15317e-16	0.0255029	chr10	14372431	FRMD4A	5'UTR	0.018	1.23e-26
cg20816447	2.24955e-08	-0.0227988	chr4	15480781	CC2D2A;CC2D2A;CC2D2A	Body;Body;Body	-0.02	9.44e-14
cg21161138	6.54485e-18	-0.026151	chr5	399360	AHRR	Body	-0.022	1.78e-54
cg21253335	5.02972e-10	0.0231842	chr5	87835928			0.015	3.38e-12
cg22057874	4.70485e-08	0.0137605	chr2	179184866	OSBPL6;OSBPL6	TSS200;Body	0.014	1.8e-12
cg22132788	1.90232e-30	0.0352118	chr7	45002486	MYO1G	Body	0.023	2.85e-100
cg22308949	3.17827e-09	-0.0252987	chr2	206628553	NRP2;NRP2;NRP2;NRP2;NRP2	Body;Body;Body;Body;Body	-0.016	7.83e-12
cg22481770	9.66321e-09	0.0143994	chr3	156324118			0.008	6.32e-09
cg22549041	9.26046e-27	0.0600431	chr15	75019251	CYP1A1	TSS1500	0.066	3.59e-60
cg22937882	1.07919e-12	0.0152171	chr5	405774	AHRR;LOC100310782	Body;TSS1500	0.013	4.54e-60
cg23067299	1.37336e-21	0.0306035	chr5	323907	AHRR	Body	0.029	9.93e-57
cg23414595	4.73701e-10	-0.0172899	chr22	30129607	ZMAT5;ZMAT5	Body;Body	-0.013	1.52e-12
cg23458168	2.36901e-08	0.0228076	chr19	30864867	ZNF536	5'UTR	0.014	5.75e-10
cg23916896	4.38233e-11	-0.0200516	chr5	368804	AHRR	Body	-0.012	1e-24
cg24720008	8.16727e-09	0.0175655	chr10	44788044			NA	NA
cg25189904	3.61188e-12	-0.0239726	chr1	68299493	GNG12	TSS1500	-0.024	1.38e-32
cg25325512	1.09374e-08	-0.0257893	chr6	37142220	PIM1	3'UTR	-0.021	2.6e-15
cg25464840	8.07987e-20	0.0264974	chr10	14372910	FRMD4A	TSS200	0.021	1.26e-34
cg25949550	2.08737e-33	-0.0158118	chr7	145814306	CNTNAP2	Body	-0.014	1.68e-119
cg26516004	2.99326e-15	0.0196795	chr15	75019376	CYP1A1	TSS1500	0.013	6.13e-37
cg26681628	2.12178e-11	0.0211763	chr16	54210550			0.022	1.35e-28
cg26703534	3.58329e-09	-0.0138885	chr5	377358	AHRR	Body	-0.009	2.14e-17
cg26764244	2.65545e-14	-0.0198205	chr1	68299511	GNG12	TSS1500	-0.016	1.89e-24
cg26889659	1.7492e-09	-0.0340082	chr6	684090	EXOC2	5'UTR	-0.042	1.14e-24
cg27434149	5.72014e-10	0.031096	chr10	62332846			0.025	8.49e-13

## Sheet: Supp Table 6
Conditional analysis within 70 distinct loci associated with maternal smoking.
ProbeID of Index DMP	EWAS of maternal smoking (weeks) P-value	Chr	Pos	ProbeID of Secondary DMP	EWAS of maternal smoking adjusted for index DMP
					P-value	Regression coefficient
cg05575921	1.44385e-107	5	373378	cg11902777	0.835746	-0.00029773
cg05575921	1.44385e-107	5	373378	cg23916896	0.112806	-0.00591347
cg05575921	1.44385e-107	5	373378	cg26703534	0.324699	-0.00284444
cg05575921	1.44385e-107	5	373378	cg12806681	0.0133005	-0.0102399
cg05575921	1.44385e-107	5	373378	cg03991871	0.0226279	-0.0124842
cg09935388	1.49532e-48	1	92947588	cg14179389	8.49739e-15	-0.0406191
cg09935388	1.49532e-48	1	92947588	cg12876356	0.0299724	0.0115119
cg09935388	1.49532e-48	1	92947588	cg18146737	0.000110328	0.0211022
cg09935388	1.49532e-48	1	92947588	cg18316974	3.70347e-06	0.0253146
cg09935388	1.49532e-48	1	92947588	cg09662411	5.18622e-06	0.0230429
cg09935388	1.49532e-48	1	92947588	cg06338710	1.07938e-11	0.0451802
cg09935388	1.49532e-48	1	92947588	cg04535902	1.38967e-13	0.0375562
cg09935388	1.49532e-48	1	92947588	cg10399789	1.04332e-10	0.0357211
cg12803068	2.10611e-47	7	45002919	cg04180046	6.57303e-07	0.0195616
cg12803068	2.10611e-47	7	45002919	cg22132788	0.548751	0.00130577
cg12803068	2.10611e-47	7	45002919	cg19089201	0.0763888	0.00596751
cg25949550	2.08737e-33	7	145814306	NA	NA	NA
cg05549655	1.91289e-27	15	75019143	cg22549041	7.68782e-06	0.0192751
cg05549655	1.91289e-27	15	75019143	cg12101586	0.00016976	0.0132096
cg05549655	1.91289e-27	15	75019143	cg18092474	0.00119341	0.0127666
cg05549655	1.91289e-27	15	75019143	cg11924019	0.00305956	0.00813512
cg05549655	1.91289e-27	15	75019143	cg13570656	0.00214439	0.0117552
cg05549655	1.91289e-27	15	75019143	cg26516004	0.0264496	0.00486222
cg05549655	1.91289e-27	15	75019143	cg00213123	0.0150762	0.00556516
cg05549655	1.91289e-27	15	75019143	cg17852385	0.590209	-0.00153858
cg15507334	4.36615e-27	10	14372913	cg11813497	7.95195e-08	0.0161678
cg15507334	4.36615e-27	10	14372913	cg25464840	0.105543	0.00331699
cg15507334	4.36615e-27	10	14372913	cg20344448	0.0426242	0.00540851
cg01952185	8.18668e-23	5	134813213	cg11429111	0.000897432	0.00911662
cg23067299	1.37336e-21	5	323907	cg17924476	0.000100301	0.0141677
cg23067299	1.37336e-21	5	323907	cg01970407	0.00193552	0.00898798
cg00253658	7.881e-20	16	54210496	cg26681628	0.388349	0.00212242
cg21161138	6.54485e-18	5	399360	NA	NA	NA
cg18703066	2.02904e-17	2	105363536	NA	NA	NA
cg04224247	2.89741e-15	23	9984515	NA	NA	NA
cg11641006	7.27722e-15	2	235213874	NA	NA	NA
cg07339236	7.83208e-15	20	50312490	NA	NA	NA
cg26764244	2.65545e-14	1	68299511	cg25189904	0.0011079	-0.00960501
cg06235438	8.74851e-14	16	30485966	NA	NA	NA
cg10520740	1.56396e-13	12	1952798	NA	NA	NA
cg13279811	2.81622e-13	3	24725365	NA	NA	NA
cg16848873	4.81747e-13	17	46682308	cg10906729	0.0306811	0.00665998
cg16848873	4.81747e-13	17	46682308	cg02574073	0.140242	0.00512126
cg16848873	4.81747e-13	17	46682308	cg18684142	0.901278	0.000433763
cg16848873	4.81747e-13	17	46682308	cg05888755	0.750612	0.000891587
cg22937882	1.07919e-12	5	405774	NA	NA	NA
cg01359532	1.23478e-12	15	75045126	NA	NA	NA
cg15892280	1.44315e-12	21	40180000	NA	NA	NA
cg02583484	2.65041e-12	12	54677008	NA	NA	NA
cg11207515	3.38908e-12	7	146904205	NA	NA	NA
cg16517298	3.57738e-12	1	230413174	NA	NA	NA
cg00501876	5.00188e-11	3	39193251	NA	NA	NA
cg18473733	6.19453e-11	19	16437362	NA	NA	NA
cg15016771	6.48992e-11	2	235403218	NA	NA	NA
cg15578140	1.67466e-10	7	147718109	NA	NA	NA
cg14157435	2.85233e-10	2	206628692	cg05348875	0.299222	-0.00312991
cg14157435	2.85233e-10	2	206628692	cg22308949	0.346928	-0.00206343
cg23414595	4.73701e-10	22	30129607	NA	NA	NA
cg21253335	5.02972e-10	5	87835928	NA	NA	NA
cg04598670	5.30626e-10	7	68697651	NA	NA	NA
cg27434149	5.72014e-10	10	62332846	NA	NA	NA
cg13834112	8.11872e-10	15	90361639	NA	NA	NA
cg04459939	1.08873e-09	15	90291141	NA	NA	NA
cg10239319	1.09631e-09	4	6073656	NA	NA	NA
cg14817490	1.15047e-09	5	392920	NA	NA	NA
cg14736365	1.16793e-09	5	173947646	NA	NA	NA
cg05174975	1.72851e-09	17	37008030	NA	NA	NA
cg26889659	1.7492e-09	6	684090	NA	NA	NA
cg18493761	1.85561e-09	11	125386885	NA	NA	NA
cg13784312	1.92768e-09	9	134609065	NA	NA	NA
cg18096987	2.03022e-09	3	11623873	NA	NA	NA
cg10673740	2.93323e-09	10	121411826	NA	NA	NA
cg10855531	3.21438e-09	2	62702472	NA	NA	NA
cg03043406	7.40473e-09	1	45242356	NA	NA	NA
cg24720008	8.16727e-09	10	44788044	NA	NA	NA
cg01668281	8.72411e-09	21	37915281	NA	NA	NA
cg22481770	9.66321e-09	3	156324118	NA	NA	NA
cg00930606	1.07899e-08	22	31740944	NA	NA	NA
cg25325512	1.09374e-08	6	37142220	NA	NA	NA
cg07742396	1.2379e-08	1	27853060	NA	NA	NA
cg10312186	1.25515e-08	6	170403583	NA	NA	NA
cg08553327	1.7e-08	6	31543647	NA	NA	NA
cg16057408	1.74715e-08	14	101196998	NA	NA	NA
cg14565151	1.76443e-08	12	95945384	NA	NA	NA
cg20816447	2.24955e-08	4	15480781	NA	NA	NA
cg16255816	2.28235e-08	17	39889811	NA	NA	NA
cg23458168	2.36901e-08	19	30864867	cg18680834	0.00381591	0.00772719
cg10841124	2.56776e-08	5	433274	NA	NA	NA
cg07069636	3.13577e-08	16	30671749	NA	NA	NA
cg13547053	3.17155e-08	2	179184864	cg22057874	0.00190976	0.00686565
cg10145533	3.48272e-08	8	20350779	NA	NA	NA
cg05928290	3.75388e-08	14	54418728	NA	NA	NA
cg03769939	5.01867e-08	1	25254129	NA	NA	NA
cg10187927	5.27834e-08	5	135364060	NA	NA	NA
cg16331632	5.81971e-08	14	60783238	NA	NA	NA
cg04359840	7.69567e-08	16	17563300	NA	NA	NA
cg07243147	9.67786e-08	7	150744274	NA	NA	NA

## Sheet: Supp Table 7
143 DMPs associated with maternal smoking selected for mediation analysis
ProbeID	chr	pos	Gene Annotation	Birth weight ~ maternal smoking		EWAS of maternal smoking		EWAS of birth weight		EWAS of birth weight adjusted for maternal smoking		Sobel test P-value
				P-value	Regression coefficient	P-value	Regression coefficient	P-value	Regression coefficient	P-value	Regression coefficient
cg00213123	chr15	75019070	CYP1A1	3.20627e-14	-282.418	3.14615e-12	0.0163685	0.595313	-1.22157e-06	1.26499e-13	-281.36	0.0474589
cg00253658	chr16	54210496		3.20627e-14	-282.418	1.23184e-23	0.0498627	3.30533e-07	-2.5188e-05	4.6634e-10	-241.272	1.84266e-06
cg00501876	chr3	39193251	CSRNP1	3.20627e-14	-282.418	5.9448e-10	-0.0109145	0.987265	-2.60926e-08	8.36581e-16	-302.12	0.172866
cg00930606	chr22	31740944	PATZ1;PATZ1;PATZ1;PATZ1	3.20627e-14	-282.418	1.04266e-10	-0.0134259	0.0307657	4.2281e-06	5.39778e-13	-274.384	0.00184853
cg01359532	chr15	75045126	CYP1A2	3.20627e-14	-282.418	5.98619e-14	0.0178354	0.0196027	-5.32781e-06	6.02786e-14	-286.515	0.206285
cg01668281	chr21	37915281	CLDN14;CLDN14	3.20627e-14	-282.418	2.42108e-10	-0.0165879	0.0100377	6.33411e-06	1.42525e-12	-267.651	0.00387959
cg01731783	chr14	74211788	C14orf43;C14orf43	3.20627e-14	-282.418	4.4517e-08	-0.00906581	0.0345884	3.34322e-06	6.42472e-14	-282.239	0.129492
cg01952185	chr5	134813213		3.20627e-14	-282.418	4.64031e-25	0.0418074	0.00239167	-1.18731e-05	3.10249e-13	-284.376	0.00121088
cg01970407	chr5	323320	AHRR	3.20627e-14	-282.418	1.47471e-09	0.0171615	0.165548	-3.71885e-06	2.52814e-14	-287.817	0.732268
cg02532700	chr22	37257404	NCF4;NCF4	3.20627e-14	-282.418	9.93701e-08	-0.0143551	0.00856191	6.81882e-06	5.95616e-14	-280.102	0.155967
cg02574073	chr17	46682398	LOC404266;LOC404266;HOXB6	3.20627e-14	-282.418	1.53288e-10	0.0322151	0.492383	-3.28827e-06	3.93896e-15	-295.54	0.274391
cg02583484	chr12	54677008	HNRNPA1;HNRPA1L-2;HNRNPA1	3.20627e-14	-282.418	2.70056e-14	-0.0183578	0.00718846	6.10962e-06	4.88208e-13	-275.45	0.0166765
cg03037030	chr6	31543300	TNF	3.20627e-14	-282.418	6.42621e-08	-0.0117879	0.0227624	4.6571e-06	5.42653e-13	-269.6	0.0059128
cg03043406	chr1	45242356	RPS8;SNORD38A	3.20627e-14	-282.418	3.33692e-11	-0.0203917	0.00194967	9.16229e-06	9.09284e-13	-269.129	0.00183579
cg03144619	chr1	230415668	GALNT2	3.20627e-14	-282.418	2.31374e-08	-0.0314905	0.0108806	1.3839e-05	1.42215e-13	-280.187	0.0408843
cg03769939	chr1	25254129	RUNX3;RUNX3	3.20627e-14	-282.418	2.35793e-08	-0.0148074	0.264304	2.81443e-06	2.07596e-14	-288.595	0.692865
cg03796381	chr15	36650033		3.20627e-14	-282.418	8.22307e-09	0.0149347	0.000358665	-8.79176e-06	5.98211e-12	-257.428	0.000703954
cg03991871	chr5	368447	AHRR	3.20627e-14	-282.418	6.81628e-09	-0.0246791	0.129918	6.16267e-06	3.11841e-14	-286.501	0.507848
cg04180046	chr7	45002736	MYO1G	3.20627e-14	-282.418	1.40894e-45	0.0681323	4.07122e-05	-1.96955e-05	5.57584e-11	-269.268	7.72432e-05
cg04224247	chrX	9984515	WWC3	3.20627e-14	-282.418	4.53187e-16	-0.0291681	0.109073	5.52321e-06	4.9032e-13	-277.017	0.00282214
cg04359840	chr16	17563300	XYLT1	3.20627e-14	-282.418	7.24232e-08	-0.0137902	0.769562	7.30886e-07	1.79533e-14	-288.77	0.732622
cg04425624	chr6	31543565	TNF	3.20627e-14	-282.418	4.90398e-08	-0.0109127	0.000358524	6.58133e-06	2.66635e-13	-273.003	0.0192564
cg04459939	chr15	90291141		3.20627e-14	-282.418	4.54295e-11	0.0257421	0.00751552	-9.98763e-06	4.17013e-15	-297.589	0.104387
cg04488758	chr12	95945366	USP44	3.20627e-14	-282.418	9.16559e-08	0.013695	0.0167295	-5.83467e-06	1.68413e-14	-287.067	0.667068
cg04535902	chr1	92947332	GFI1;GFI1;GFI1	3.20627e-14	-282.418	1.19835e-12	-0.049165	0.00206437	1.95608e-05	2.418e-12	-266.785	0.000928633
cg04598670	chr7	68697651		3.20627e-14	-282.418	2.69632e-11	-0.0200899	0.0878949	4.85882e-06	2.75606e-12	-264.528	0.00141783
cg05174975	chr17	37008030	RPL23	3.20627e-14	-282.418	1.52965e-10	-0.0149663	0.14424	3.25858e-06	3.49745e-14	-287.299	0.229188
cg05348875	chr2	206628625	NRP2;NRP2;NRP2;NRP2;NRP2	3.20627e-14	-282.418	2.45356e-11	-0.0415688	0.0360684	1.24595e-05	1.04084e-12	-269.883	0.00652595
cg05460571	chr8	8630364		3.20627e-14	-282.418	2.79465e-08	-0.0138199	5.19294e-05	9.40188e-06	9.29371e-12	-251.551	0.00257062
cg05549655	chr15	75019143	CYP1A1	3.20627e-14	-282.418	2.30395e-29	0.0331382	0.00286635	-8.5476e-06	8.28093e-13	-279.531	0.000397286
cg05575921	chr5	373378	AHRR	3.20627e-14	-282.418	8.29403e-119	-0.0819583	1.16705e-10	2.37239e-05	0.000150567	-178.772	8.52071e-14
cg05888755	chr17	46682319	LOC404266;LOC404266;HOXB6;HOXB6	3.20627e-14	-282.418	5.40611e-09	0.0245392	0.65043	-1.83134e-06	1.29004e-15	-300.364	0.0940902
cg05923197	chr14	54418804	BMP4;BMP4;BMP4	3.20627e-14	-282.418	2.26377e-08	0.0330256	0.00452784	-1.6198e-05	1.62064e-14	-290.287	0.669795
cg05928290	chr14	54418728	BMP4;BMP4;BMP4	3.20627e-14	-282.418	6.24483e-09	0.0289573	0.00755258	-1.28198e-05	5.11776e-15	-295.899	0.730723
cg06235438	chr16	30485966	ITGAL;ITGAL	3.20627e-14	-282.418	5.88692e-15	-0.0148439	0.0704841	3.32808e-06	4.61456e-15	-298.405	0.98912
cg06338710	chr1	92946187	GFI1;GFI1;GFI1	3.20627e-14	-282.418	6.13461e-14	-0.0682256	0.00133896	2.70387e-05	6.66313e-12	-261.836	0.000243068
cg07069636	chr16	30671749		3.20627e-14	-282.418	6.95411e-10	-0.0128037	0.00299075	5.75897e-06	2.17819e-14	-288.591	0.849105
cg07339236	chr20	50312490	ATP9A	3.20627e-14	-282.418	4.02236e-17	-0.0222299	0.000902768	8.38739e-06	9.34812e-13	-274.753	0.00879064
cg07452706	chr14	105649097	NUDT14	3.20627e-14	-282.418	3.21892e-08	-0.0117894	0.000430064	7.17656e-06	7.31983e-13	-268.201	0.00600809
cg07742396	chr1	27853060		3.20627e-14	-282.418	1.12315e-09	-0.011659	0.0315724	3.93394e-06	3.79797e-12	-261.819	0.000175191
cg07796597	chr10	11379739		3.20627e-14	-282.418	1.97062e-08	-0.0146406	0.0227719	5.8167e-06	6.50243e-14	-283.173	0.136929
cg07814318	chr15	31624584	KLF13	3.20627e-14	-282.418	7.02285e-08	-0.0148337	3.50178e-06	1.21417e-05	1.24583e-12	-268.089	0.00157376
cg08553327	chr6	31543647	TNF	3.20627e-14	-282.418	1.58084e-11	-0.0143412	2.06552e-06	9.64205e-06	5.95207e-13	-268.096	0.0118182
cg09411730	chr11	65190946	NEAT1	3.20627e-14	-282.418	1.44259e-08	-0.037392	0.000591845	2.04827e-05	4.275e-15	-296.152	0.656248
cg09511421	chr4	116034871	NDST4;NDST4	3.20627e-14	-282.418	7.59854e-08	0.0155449	0.0862425	-4.8366e-06	1.69424e-13	-277.08	0.102505
cg09662411	chr1	92946132	GFI1;GFI1;GFI1	3.20627e-14	-282.418	1.03138e-23	-0.0767158	8.16228e-05	2.83467e-05	2.88289e-11	-258.407	4.27994e-05
cg09935388	chr1	92947588	GFI1;GFI1;GFI1	3.20627e-14	-282.418	1.39248e-55	-0.120802	2.57557e-08	4.18408e-05	2.7238e-08	-229.556	3.5755e-09
cg10145533	chr8	20350779		3.20627e-14	-282.418	2.20161e-09	0.020837	0.0019598	-9.96506e-06	2.62941e-13	-270.203	0.173188
cg10312186	chr6	170403583		3.20627e-14	-282.418	1.40909e-09	-0.0230656	0.196375	4.6521e-06	1.89785e-14	-290.505	0.76211
cg10399789	chr1	92945668	GFI1;GFI1;GFI1	3.20627e-14	-282.418	2.12618e-09	-0.0403754	0.0258931	1.39475e-05	3.45286e-13	-275.127	0.0144109
cg10520740	chr12	1952798	CACNA2D4	3.20627e-14	-282.418	1.53076e-15	-0.0169394	0.00305317	5.9692e-06	3.87922e-12	-263.593	0.00054343
cg10673740	chr10	121411826	BAG3	3.20627e-14	-282.418	6.9034e-10	0.0184391	0.0325542	-6.08434e-06	1.06487e-13	-280.102	0.111566
cg10841124	chr5	433274	AHRR	3.20627e-14	-282.418	5.607e-09	0.0104522	0.0751471	-3.08812e-06	1.12891e-13	-280.658	0.11183
cg10855531	chr2	62702472		3.20627e-14	-282.418	4.80792e-10	-0.0158899	0.0814081	4.30365e-06	1.30032e-14	-289.885	0.508106
cg10906729	chr17	46682390	LOC404266;LOC404266;HOXB6	3.20627e-14	-282.418	1.25406e-11	0.0296722	0.781583	-1.16063e-06	2.37121e-15	-298.418	0.238899
cg11207515	chr7	146904205	CNTNAP2	3.20627e-14	-282.418	6.14168e-12	-0.0245847	0.855757	6.30071e-07	1.37889e-15	-302.374	0.473187
cg11429111	chr5	134813329		3.20627e-14	-282.418	1.94026e-24	0.039445	0.000244338	-1.39065e-05	1.14633e-12	-275.748	0.000311893
cg11556164	chr7	110738315	LRRN3;IMMP2L;LRRN3;LRRN3	3.20627e-14	-282.418	5.32054e-09	-0.0138204	0.0410062	4.63021e-06	5.34468e-13	-274.32	0.0211966
cg11625488	chr6	170403557		3.20627e-14	-282.418	3.25961e-08	-0.0194868	0.0240637	7.5673e-06	7.22734e-14	-283.034	0.177552
cg11641006	chr2	235213874		3.20627e-14	-282.418	1.22916e-15	0.0273716	0.0236557	-7.43492e-06	2.1373e-15	-305.287	0.271569
cg11813497	chr10	14372879	FRMD4A	3.20627e-14	-282.418	1.71993e-25	0.0354164	0.492706	-2.25585e-06	1.85144e-16	-319.482	0.772862
cg11902777	chr5	368843	AHRR	3.20627e-14	-282.418	3.55572e-12	-0.00803309	0.285742	1.18089e-06	3.16149e-15	-301.084	0.938386
cg11924019	chr15	75019283	CYP1A1	3.20627e-14	-282.418	3.29789e-24	0.0356484	0.00179675	-1.0596e-05	1.85541e-12	-272.921	9.49823e-05
cg12062133	chr8	142548839		3.20627e-14	-282.418	5.48647e-08	0.0166736	0.445429	-2.2723e-06	9.0677e-15	-291.922	0.546999
cg12101586	chr15	75019203	CYP1A1	3.20627e-14	-282.418	9.03638e-27	0.0488952	0.0152924	-1.08482e-05	4.90385e-13	-281.564	0.000905189
cg12803068	chr7	45002919	MYO1G	3.20627e-14	-282.418	5.09529e-50	0.0806209	0.000542108	-1.86058e-05	2.0027e-11	-277.109	0.000198069
cg12806681	chr5	368394	AHRR	3.20627e-14	-282.418	1.48023e-09	-0.0194375	0.280578	3.32667e-06	4.40276e-14	-285.344	0.324122
cg12868738	chr7	148946070	ZNF212	3.20627e-14	-282.418	2.61282e-08	-0.0164699	2.14648e-10	1.76535e-05	5.54073e-12	-254.091	0.00548059
cg12876356	chr1	92946825	GFI1;GFI1;GFI1	3.20627e-14	-282.418	1.96364e-38	-0.131173	5.52871e-07	4.87941e-05	4.54256e-09	-234.177	3.02508e-08
cg13279811	chr3	24725365		3.20627e-14	-282.418	1.58713e-13	-0.0217654	0.25006	3.24999e-06	2.02599e-15	-301.924	0.653034
cg13547053	chr2	179184864	OSBPL6;OSBPL6	3.20627e-14	-282.418	1.14419e-08	0.0131343	0.0682834	-3.97403e-06	6.69346e-12	-256.834	0.000831608
cg13570656	chr15	75019196	CYP1A1	3.20627e-14	-282.418	9.12622e-24	0.0476984	0.00440215	-1.31648e-05	3.58799e-13	-281.664	0.00117516
cg13687834	chr10	3514783		3.20627e-14	-282.418	1.91679e-09	0.0188681	1.39462e-06	-1.37663e-05	1.42521e-10	-232.727	0.00167735
cg13784312	chr9	134609065	RAPGEF1	3.20627e-14	-282.418	7.66537e-09	-0.0173158	0.874599	4.36551e-07	5.7219e-18	-322.316	0.00718393
cg13822849	chr9	137999757	OLFM1	3.20627e-14	-282.418	4.03546e-08	0.0125589	0.0689167	-3.90185e-06	1.53887e-13	-277.977	0.0437484
cg13834112	chr15	90361639		3.20627e-14	-282.418	2.32358e-11	0.0217207	0.00327775	-9.01238e-06	1.89523e-14	-290.577	0.668629
cg13922488	chr19	14545201	PKN1	3.20627e-14	-282.418	1.01963e-08	-0.0106793	0.0234058	3.90392e-06	2.95e-15	-296.839	0.395811
cg14157435	chr2	206628692	NRP2;NRP2;NRP2;NRP2;NRP2	3.20627e-14	-282.418	6.33343e-12	-0.0449744	0.0240316	1.42093e-05	1.73842e-12	-266.987	0.00174134
cg14179389	chr1	92947961	GFI1;GFI1;GFI1	3.20627e-14	-282.418	1.28712e-49	-0.0788047	0.000206097	1.95351e-05	3.48665e-11	-270.622	2.41781e-05
cg14334488	chr8	143279443	NCRNA00051	3.20627e-14	-282.418	7.23087e-08	0.0156114	0.908435	-3.13558e-07	1.46597e-14	-291	0.412446
cg14565151	chr12	95945384	USP44	3.20627e-14	-282.418	2.92921e-10	0.0173438	0.000155143	-9.71581e-06	1.53932e-14	-288.906	0.533736
cg14736365	chr5	173947646		3.20627e-14	-282.418	5.78833e-09	0.0216884	0.468617	-2.5377e-06	2.98135e-16	-306.746	0.0409442
cg14817490	chr5	392920	AHRR	3.20627e-14	-282.418	5.80661e-13	-0.0196222	4.12742e-06	1.20789e-05	9.00284e-12	-259.668	0.00010744
cg14897188	chr17	6917185	RNASEK;C17orf49;C17orf49;C17orf49	3.20627e-14	-282.418	1.11303e-08	-0.0113077	0.00474118	5.34052e-06	2.08659e-13	-276.829	0.0426501
cg15016771	chr2	235403218	ARL4C;ARL4C	3.20627e-14	-282.418	5.73376e-12	0.0252264	0.000951598	-1.15683e-05	6.69068e-15	-293.501	0.229048
cg15507334	chr10	14372913	FRMD4A	3.20627e-14	-282.418	1.37327e-26	0.0299708	0.18993	-3.62836e-06	2.42604e-16	-320.332	0.499089
cg15578140	chr7	147718109	MIR548F3;CNTNAP2	3.20627e-14	-282.418	9.51823e-12	0.0164832	0.00892069	-6.21855e-06	5.31971e-14	-284.691	0.3922
cg15892280	chr21	40180000	ETS2	3.20627e-14	-282.418	1.97526e-11	-0.0160576	0.709635	-8.31243e-07	1.47146e-16	-309.159	0.00422334
cg15974931	chr8	110374294	PKHD1L1	3.20627e-14	-282.418	5.23962e-08	0.0156429	0.000344777	-9.54549e-06	2.51752e-14	-286.691	0.444256
cg16057408	chr14	101196998	DLK1	3.20627e-14	-282.418	2.40905e-08	0.0122248	0.728068	-7.41546e-07	1.01606e-14	-291.153	0.857424
cg16255816	chr17	39889811	HAP1;HAP1;HAP1	3.20627e-14	-282.418	2.23198e-08	-0.0121195	0.738524	7.01148e-07	6.97258e-14	-282	0.266818
cg16331632	chr14	60783238		3.20627e-14	-282.418	9.73271e-09	0.0158835	0.0211876	-6.18641e-06	2.6319e-14	-286.394	0.264694
cg16517298	chr1	230413174	GALNT2	3.20627e-14	-282.418	1.62193e-13	-0.0256671	0.00512856	9.28683e-06	9.46113e-15	-295.63	0.517447
cg16848873	chr17	46682308	LOC404266;LOC404266;HOXB6;HOXB6	3.20627e-14	-282.418	2.57362e-12	0.0314838	0.733253	1.48457e-06	4.74866e-16	-306.266	0.0563445
cg16875104	chr7	30635889	GARS	3.20627e-14	-282.418	4.70587e-08	-0.0233409	0.133807	6.14023e-06	3.05138e-13	-274.491	0.00334914
cg17679743	chr17	76268136		3.20627e-14	-282.418	2.14859e-08	0.0114949	0.000574078	-6.54065e-06	8.58751e-13	-265.426	0.0187442
cg17852385	chr15	75019188	CYP1A1	3.20627e-14	-282.418	2.67185e-12	0.023805	0.00793525	-8.6892e-06	1.74381e-13	-279.091	0.00575911
cg17924476	chr5	323794	AHRR	3.20627e-14	-282.418	1.04274e-15	0.0304444	0.112667	-5.76581e-06	1.09775e-13	-282.623	0.074472
cg18092474	chr15	75019302	CYP1A1	3.20627e-14	-282.418	9.48891e-26	0.0539466	0.00202309	-1.51529e-05	1.40254e-12	-275.292	0.000133606
cg18096987	chr3	11623873	VGLL4;VGLL4;VGLL4	3.20627e-14	-282.418	4.11348e-09	-0.0131467	0.759812	-6.66916e-07	2.79031e-15	-299.731	0.706641
cg18132363	chr6	166260572		3.20627e-14	-282.418	5.00937e-09	-0.0221009	0.00325233	1.04975e-05	4.23979e-13	-274.143	0.00271443
cg18146737	chr1	92946700	GFI1;GFI1;GFI1	3.20627e-14	-282.418	2.78927e-32	-0.116838	2.14002e-06	4.46887e-05	9.28706e-10	-241.832	2.342e-07
cg18316974	chr1	92947035	GFI1;GFI1;GFI1	3.20627e-14	-282.418	8.0385e-26	-0.0914401	1.18195e-05	3.60912e-05	2.15115e-10	-247.566	1.42683e-06
cg18422587	chr7	3134670		3.20627e-14	-282.418	1.11441e-08	0.0158855	0.0117976	-6.57838e-06	4.69148e-12	-257.154	0.00142368
cg18473733	chr19	16437362	KLF2	3.20627e-14	-282.418	2.96495e-12	-0.0148299	0.224542	2.49665e-06	1.48212e-13	-280.295	0.0465831
cg18493761	chr11	125386885		3.20627e-14	-282.418	2.77547e-10	0.0275059	0.0930762	-6.76216e-06	4.89114e-15	-297.079	0.778751
cg18684142	chr17	46682394	LOC404266;LOC404266;HOXB6	3.20627e-14	-282.418	3.11103e-09	0.0329902	0.652425	-2.38372e-06	4.19459e-15	-295.611	0.354035
cg18703066	chr2	105363536		3.20627e-14	-282.418	7.74918e-20	-0.0175426	0.000866905	6.18835e-06	1.46196e-12	-273.43	0.00452642
cg19089201	chr7	45002287	MYO1G	3.20627e-14	-282.418	4.94136e-24	0.0365013	0.00492491	-9.94554e-06	1.43362e-13	-287.498	0.0696846
cg19828220	chr17	46682413	LOC404266;LOC404266;HOXB6	3.20627e-14	-282.418	9.01634e-08	0.0225422	0.479992	-2.82291e-06	2.78779e-15	-297.527	0.18073
cg20344448	chr10	14372431	FRMD4A	3.20627e-14	-282.418	1.14965e-14	0.0236973	0.684775	1.19694e-06	2.24596e-16	-311.144	0.607171
cg20816447	chr4	15480781	CC2D2A;CC2D2A;CC2D2A	3.20627e-14	-282.418	6.91416e-10	-0.0244508	0.00724753	9.9595e-06	9.32697e-12	-255.842	0.000115625
cg21161138	chr5	399360	AHRR	3.20627e-14	-282.418	1.93994e-20	-0.027243	0.000365187	1.0259e-05	8.37641e-12	-264.535	0.000453259
cg21253335	chr5	87835928		3.20627e-14	-282.418	1.51742e-10	0.0230851	0.144472	-5.12123e-06	7.15124e-14	-283.391	0.0795074
cg21370522	chr6	31543219	TNF	3.20627e-14	-282.418	1.3851e-08	-0.0152759	0.00169579	8.16464e-06	6.89289e-12	-256.349	0.000258127
cg21611682	chr11	68138269	LRP5	3.20627e-14	-282.418	1.96317e-10	-0.0130648	3.36891e-06	8.96368e-06	3.32502e-12	-259.247	0.00179899
cg22057874	chr2	179184866	OSBPL6;OSBPL6	3.20627e-14	-282.418	2.29065e-09	0.014694	0.00138373	-7.5303e-06	2.49751e-12	-261.665	0.00291727
cg22132788	chr7	45002486	MYO1G	3.20627e-14	-282.418	5.11243e-31	0.0344051	0.0469015	-5.67511e-06	3.93278e-13	-287.28	0.0118727
cg22308949	chr2	206628553	NRP2;NRP2;NRP2;NRP2;NRP2	3.20627e-14	-282.418	1.07541e-10	-0.0267064	0.132805	5.98805e-06	6.08082e-13	-272.355	0.00962892
cg22481770	chr3	156324118		3.20627e-14	-282.418	1.52086e-08	0.0138649	0.15523	-3.33973e-06	4.6718e-15	-295.736	0.760234
cg22549041	chr15	75019251	CYP1A1	3.20627e-14	-282.418	4.35251e-30	0.0620018	0.000103756	-2.08105e-05	4.13419e-12	-272.073	4.67198e-05
cg22778120	chr22	45094531	PRR5;PRR5;PRR5;PRR5	3.20627e-14	-282.418	4.73831e-08	-0.0181315	4.60275e-06	1.42508e-05	7.17573e-13	-266.498	0.0189885
cg22851200	chr7	100465833	TRIP6	3.20627e-14	-282.418	4.11396e-08	-0.0158213	5.41118e-06	1.25177e-05	5.14016e-12	-256.698	0.000987447
cg22937882	chr5	405774	AHRR;LOC100310782	3.20627e-14	-282.418	5.00162e-14	0.0155782	0.00693844	-5.38577e-06	1.92611e-12	-269.07	0.00244524
cg23067299	chr5	323907	AHRR	3.20627e-14	-282.418	2.1475e-23	0.0310503	0.0629277	-5.57112e-06	5.02738e-14	-292.384	0.110227
cg23351584	chr11	86512100	PRSS23	3.20627e-14	-282.418	7.10504e-08	0.0126522	0.00112056	-7.40751e-06	2.1696e-12	-263.155	0.00111391
cg23414595	chr22	30129607	ZMAT5;ZMAT5	3.20627e-14	-282.418	1.40133e-12	-0.019553	5.79274e-06	1.17432e-05	2.49962e-14	-288.762	0.614824
cg23916896	chr5	368804	AHRR	3.20627e-14	-282.418	4.17354e-13	-0.0213732	0.00528354	7.88336e-06	1.89757e-13	-281.235	0.0438087
cg24142464	chr1	40040489	PABPC4;PABPC4;PABPC4	3.20627e-14	-282.418	2.19025e-08	-0.0100648	0.00107311	5.65661e-06	6.54115e-13	-269.454	0.00531587
cg24720008	chr10	44788044		3.20627e-14	-282.418	5.61486e-09	0.0172999	0.145986	-4.14763e-06	4.81454e-15	-295.352	0.846829
cg25189904	chr1	68299493	GNG12	3.20627e-14	-282.418	7.90644e-13	-0.0239102	0.288487	3.38583e-06	4.46974e-15	-298.79	0.621794
cg25325512	chr6	37142220	PIM1	3.20627e-14	-282.418	2.27891e-12	-0.0310203	2.35076e-07	2.16518e-05	7.31238e-12	-259.625	0.000127864
cg25464840	chr10	14372910	FRMD4A	3.20627e-14	-282.418	5.48968e-19	0.0252549	0.393201	-2.36834e-06	1.15612e-16	-318.004	0.960147
cg25949550	chr7	145814306	CNTNAP2	3.20627e-14	-282.418	1.57395e-36	-0.0161767	0.000448827	4.42237e-06	1.21565e-12	-275.185	0.00281796
cg26145873	chr3	181604621		3.20627e-14	-282.418	1.68159e-08	0.0147759	0.0148563	-6.12279e-06	4.5953e-14	-284.448	0.199461
cg26516004	chr15	75019376	CYP1A1	3.20627e-14	-282.418	6.94525e-17	0.0201924	0.00126523	-7.55675e-06	7.94587e-14	-285.211	0.0103882
cg26681628	chr16	54210550		3.20627e-14	-282.418	5.13711e-14	0.0231802	1.45648e-05	-1.29297e-05	4.12735e-11	-251.027	6.28497e-06
cg26703534	chr5	377358	AHRR	3.20627e-14	-282.418	1.34346e-09	-0.0139018	0.206643	2.76892e-06	8.80564e-15	-292.209	0.66808
cg26764244	chr1	68299511	GNG12	3.20627e-14	-282.418	1.91551e-13	-0.0185794	0.796191	6.25397e-07	1.2629e-16	-313.832	0.0282923
cg26889659	chr6	684090	EXOC2	3.20627e-14	-282.418	7.41919e-13	-0.0398081	3.83974e-08	2.89269e-05	2.40787e-10	-238.068	1.12017e-06
cg26963632	chr16	85558148		3.20627e-14	-282.418	9.83066e-08	-0.0113912	4.19123e-05	8.22196e-06	8.57921e-14	-277.066	0.298285
cg27434149	chr10	62332846		3.20627e-14	-282.418	2.16485e-12	0.0343652	5.69414e-05	-1.87429e-05	2.76564e-11	-249.964	5.3833e-05
cg27594073	chr17	3100725	OR1A2	3.20627e-14	-282.418	5.51918e-08	0.0215034	0.331956	-3.71686e-06	1.27353e-13	-278.905	0.128681

## Sheet: Supp Table 8
SIMEX adjusted mediation analysis for 3 DNA methylation sites identified as having significant mediation effects between matenral smoking and birth weight
		cg05575921					cg09935388					cg26889659
		Naïve	SIMEX adjusted				Naïve	SIMEX adjusted				Naïve	SIMEX adjusted
			sensitivity = 0.6	sensitivity = 0.7	sensitivity = 0.8	sensitivity = 0.9		sensitivity = 0.6	sensitivity = 0.7	sensitivity = 0.8	sensitivity = 0.9		sensitivity = 0.6	sensitivity = 0.7	sensitivity = 0.8	sensitivity = 0.9
Natural direct effect	Estimate	-183.275	-284.788	-263.034	-237.344	-209.252	-225.255	-301.361	-282.844	-262.506	-242.412	-251.632	-305.539	-291.616	-276.911	-262.951
	95% Confidence interval lower limit	-252.06	-393.374	-371.208	-327.26	-292.058	-282.221	-374.645	-350.534	-334.83	-302.309	-311.785	-374.62	-361.916	-341.028	-325.739
	95% Confidence interval upper limit	-115.803	-164.877	-164.666	-147.32	-126.597	-169.661	-223.278	-212.265	-200.156	-179.759	-198.452	-237.75	-232.918	-220.313	-208.895
Natural indirect effect	Estimate	-96.0559	-25.2929	-42.7594	-61.3139	-79.8561	-54.0749	-18.4845	-28.6393	-38.2907	-47.0861	-27.6988	-21.779	-23.7488	-25.434	-26.7104
	95% Confidence interval lower limit	-140.722	-115.606	-118.59	-125.971	-134.786	-78.7202	-48.4561	-57.625	-64.41	-72.3504	-44.3883	-38.6419	-40.35	-41.5605	-43.364
	95% Confidence interval upper limit	-41.1702	65.102	36.1208	6.52344	-18.4755	-25.3807	16.9106	4.61684	-7.41878	-17.0605	-14.5996	-7.91622	-10.4785	-11.7269	-13.2327
Proportion mediated	Estimate	0.346609	0.084126	0.14272	0.208506	0.279627	0.194563	0.0585939	0.092706	0.128166	0.163673	0.100122	0.067517	0.0762412	0.0850413	0.0931648
	95% Confidence interval lower limit	0.148215	-0.194837	-0.110311	-0.0232851	0.0659806	0.0945614	-0.0538291	-0.0144525	0.0251487	0.060111	0.0523961	0.0243942	0.0317047	0.0407253	0.0458858
	95% Confidence interval upper limit	0.53973	0.394052	0.395424	0.453511	0.504282	0.289396	0.169693	0.195963	0.220979	0.263875	0.156477	0.125293	0.130329	0.142104	0.14949
